# Supplementary material for: Asymmetric synthesis of 4-aryl-1,2,5-thiadiazolidin-3-one 1,1-dioxides via Pd-catalyzed hydrogenation of cyclic ketimines
Source: Royal Society of Chemistry journal article supplement (doi:10.1039/c6ob02655a), 2017-01-01
Supplement: c6ob02655a1.pdf [file c6ob02655a1.pdf]

## Supporting Information

### Asymmetric synthesis of 4-aryl-1,2,5-thiadiazolidin-3-one 1,1-dioxides by Pd-catalyzed hydrogenation of cyclic ketimines

Zhou-Hao Zhu, Meng-Lin Chen, Guo-Fang Jiang

*Email: gfjiang@hnu.edu.cn*

#### Table of Contents

|                                                               |       |
|---------------------------------------------------------------|-------|
| 1. General.....                                               | S1    |
| 2. General Procedure for Synthesis of Cyclic Ketimines 1..... | S1-2  |
| 3. Screen of Optimizations for the Acid Additives.....        | S3    |
| 4. General Procedure for Asymmetric Hydrogenation.....        | S3-5  |
| 5. Gram Scale Experiment.....                                 | S5    |
| 6. Determination of the Absolute Configuration of 2a.....     | S6    |
| 7. References.....                                            | S6    |
| 8. Copy of NMR and HPLC for the Compounds.....                | S7-57 |

## 1. General

All reactions were carried out under an atmosphere of nitrogen using the standard Schlenk techniques, unless otherwise noted. Commercially available reagents were used without further purification. Solvents were treated prior to use according to the standard methods.  $^1\text{H}$  NMR,  $^{13}\text{C}$  NMR  $^{31}\text{P}$  NMR and  $^{19}\text{F}$  NMR spectra were recorded at room temperature in  $\text{CDCl}_3$  on 400 MHz instrument with tetramethylsilane (TMS) as internal standard. Optical rotations were measured with JASCO P-1010 polarimeter. Flash column chromatography was performed on silica gel (200-300 mesh). All reactions were monitored by TLC analysis.

## 2. General Procedure for Synthesis of Cyclic Ketimines **1**

Cyclic ketimines **1** can be conveniently synthesized according to the known literature procedures.<sup>1</sup> Among them, **1a**, **1d** and **1g-h** are the known compounds.

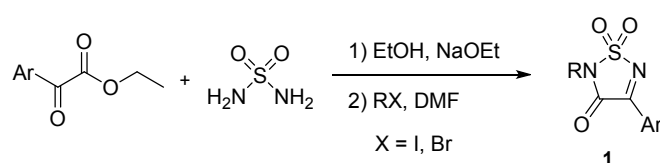

Following a known literature procedure,<sup>1</sup> to a solution of sulfamide (1.920 g, 20 mmol) in ethanol (30 mL) was slowly added sodium ethoxide (1.360 g, 20 mmol) in ethanol (5 mL). The suspension was stirred at room temperature for 15 min and then ethyl arylglyoxylate (20 mmol) in ethanol (15 mL) was added. After stirring for 15 min, the mixture was refluxed overnight and concentrated on rotary evaporator. The residue was suspended in diethyl ether for 0.5 h and the resulting white solid was filtered, which was used for the next reaction without further purification. To a suspension of the above white solid (5.0 mmol) in dimethylformamide (10 mL) was added alkyl halide (7.5 mmol), and the mixture was stirred at room temperature for 24 h. Water was added to the mixture and it was extracted with ethyl acetate. The organic extracts were washed with water, brine, dried over anhydrous sodium sulfate, filtered, and concentrated on a rotary evaporator. The residue was subjected to column chromatography on silica gel with hexanes/ethyl acetate (100:1) to give the product **1**.

**2-ethyl-4-phenyl-1,2,5-thiadiazol-3(2H)-one 1,1-dioxide (1b):** unknown compound, white solid,

m.p. = 133-134 °C, yield: 7%,  $R_f$  = 0.60 (petroleum ether/ethyl acetate 10:1).  $^1\text{H}$  NMR (400 MHz,  $\text{CDCl}_3$ )  $\delta$  8.57 (d,  $J$  = 7.7 Hz, 2H), 7.74 (t,  $J$  = 7.5 Hz, 1H), 7.57 (t,  $J$  = 7.8 Hz, 2H), 3.87 (q,  $J$  = 7.3 Hz, 2H), 1.46 (t,  $J$  = 7.3 Hz, 3H);  $^{13}\text{C}$  NMR (100 MHz,  $\text{CDCl}_3$ )  $\delta$  164.6, 156.1, 136.4, 132.3, 129.5, 127.1, 37.6, 13.2. HRMS Calculated for  $\text{C}_{10}\text{H}_{11}\text{N}_2\text{O}_3\text{S}$  ( $\text{M}+\text{H}$ )<sup>+</sup> 239.0485, found: 239.0483.

**2-benzyl-4-phenyl-1,2,5-thiadiazol-3(2H)-one 1,1-dioxide (1c):** unknown compound, white

solid, m.p. = 134-135 °C, yield: 18%,  $R_f$  = 0.46 (petroleum ether/ethyl acetate 10:1).  $^1\text{H}$  NMR (400 MHz,  $\text{CDCl}_3$ )  $\delta$  8.57 (d,  $J$  = 7.4 Hz, 2H), 7.74 (t,  $J$  = 7.5 Hz, 1H), 7.56 (t,  $J$  = 7.9 Hz, 2H), 7.52-7.45 (m, 2H), 7.43-7.31 (m, 3H), 4.91 (s, 2H);  $^{13}\text{C}$  NMR (100 MHz,  $\text{CDCl}_3$ )  $\delta$  164.6, 156.4, 136.6, 133.2, 132.4, 129.6, 129.2, 129.1, 129.0, 127.0, 45.8. HRMS Calculated for  $\text{C}_{15}\text{H}_{16}\text{N}_3\text{O}_3\text{S}$  ( $\text{M}+\text{NH}_4$ )<sup>+</sup> 318.0907, found: 318.0909.

**2-methyl-4-(*m*-tolyl)-1,2,5-thiadiazol-3(2*H*)-one 1,1-dioxide (1e):** New compound, white solid, m.p. = 119-120 °C, yield: 26%,  $R_f$  = 0.48 (petroleum ether/ethyl acetate 10:1).

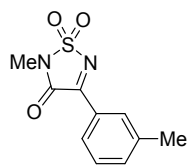

$^1\text{H NMR}$  (400 MHz,  $\text{CDCl}_3$ )  $\delta$  8.40 (d,  $J$  = 7.9 Hz, 1H), 8.35 (s, 1H), 7.55 (d,  $J$  = 7.6 Hz, 1H), 7.45 (t,  $J$  = 7.7 Hz, 1H), 3.32 (s, 3H), 2.45 (s, 3H);  $^{13}\text{C NMR}$  (100 MHz,  $\text{CDCl}_3$ )  $\delta$  165.0, 156.3, 139.6, 137.5, 132.5, 129.8, 129.5, 126.9, 26.4, 21.5. HRMS Calculated for  $\text{C}_{10}\text{H}_{11}\text{N}_2\text{O}_3\text{S}$  ( $\text{M}+\text{H}$ ) $^+$  239.0485, found: 239.0481.

**2-methyl-4-(*o*-tolyl)-1,2,5-thiadiazol-3(2*H*)-one 1,1-dioxide (1f):** New compound, yellow solid,

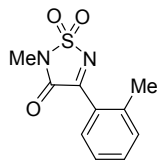

m.p. = 123-124 °C, yield: 22%,  $R_f$  = 0.28 (petroleum ether/ethyl acetate 10:1).  $^1\text{H NMR}$  (400 MHz,  $\text{CDCl}_3$ )  $\delta$  8.36 (d,  $J$  = 7.9 Hz, 1H), 7.57 (t,  $J$  = 7.5 Hz, 1H), 7.44-7.35 (m, 2H), 3.33 (s, 3H), 2.67 (s, 3H);  $^{13}\text{C NMR}$  (100 MHz,  $\text{CDCl}_3$ )  $\delta$  166.1, 156.6, 143.0, 134.9, 134.3, 132.7, 126.5, 125.2, 26.5, 22.7. HRMS Calculated for  $\text{C}_{10}\text{H}_{11}\text{N}_2\text{O}_3\text{S}$  ( $\text{M}+\text{H}$ ) $^+$  239.0485, found: 239.0486.

**4-(4-bromophenyl)-2-methyl-1,2,5-thiadiazol-3(2*H*)-one 1,1-dioxide (1i):** New compound, yellowish solid, m.p. = 202-203 °C, yield: 37%,  $R_f$  = 0.51 (petroleum ether/ethyl acetate 10:1).

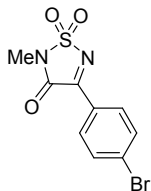

$^1\text{H NMR}$  (400 MHz,  $\text{CDCl}_3$ )  $\delta$  8.45 (d,  $J$  = 8.6 Hz, 2H), 7.73 (d,  $J$  = 8.6 Hz, 2H), 3.33 (s, 3H);  $^{13}\text{C NMR}$  (100 MHz,  $\text{CDCl}_3$ )  $\delta$  164.1, 156.0, 133.5, 133.1, 132.9, 125.8, 26.5. HRMS Calculated for  $\text{C}_9\text{H}_8\text{BrN}_2\text{O}_3\text{S}$  [ $\text{M}+\text{H}$ ] $^+$  302.9434, found: 302.9433.

**4-(4-methoxyphenyl)-2-methyl-1,2,5-thiadiazol-3(2*H*)-one 1,1-dioxide (1j):** New compound, greenish yellow solid, m.p. = 169-170 °C, yield: 16%,  $R_f$  = 0.33 (petroleum ether/ethyl acetate 10:1).

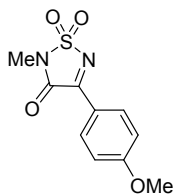

$^1\text{H NMR}$  (400 MHz,  $\text{CDCl}_3$ )  $\delta$  8.62 (d,  $J$  = 9.1 Hz, 2H), 7.03 (d,  $J$  = 9.1 Hz, 2H), 3.94 (s, 3H), 3.30 (s, 3H);  $^{13}\text{C NMR}$  (100 MHz,  $\text{CDCl}_3$ )  $\delta$  166.9, 163.3, 156.9, 135.3, 119.6, 115.3, 56.1, 26.3. HRMS Calculated for  $\text{C}_{10}\text{H}_{11}\text{N}_2\text{O}_4\text{S}$  [ $\text{M}+\text{H}$ ] $^+$  255.0434, found: 255.0435.

**2-methyl-4-(naphthalen-2-yl)-1,2,5-thiadiazol-3(2*H*)-one 1,1-dioxide (1k):** New compound, yellow solid, m.p. = 209-210 °C, yield: 21%,  $R_f$  = 0.42 (petroleum ether/ethyl acetate 10:1).

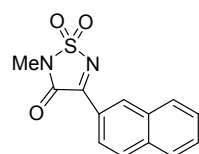

$^1\text{H NMR}$  (400 MHz,  $\text{CDCl}_3$ )  $\delta$  9.44 (s, 1H), 8.37-8.28 (m, 1H), 8.04 (d,  $J$  = 8.2 Hz, 1H), 7.96 (d,  $J$  = 8.8 Hz, 1H), 7.91 (d,  $J$  = 8.2 Hz, 1H), 7.71 (t,  $J$  = 7.4 Hz, 1H), 7.62 (t,  $J$  = 7.4 Hz, 1H), 3.36 (s, 3H);  $^{13}\text{C NMR}$  (100 MHz,  $\text{CDCl}_3$ )  $\delta$  164.4, 156.5, 137.2, 137.1, 132.7, 130.9, 130.9, 129.7, 128.3, 127.8, 125.3, 124.4, 26.5. HRMS Calculated for  $\text{C}_{13}\text{H}_{11}\text{N}_2\text{O}_3\text{S}$  ( $\text{M}+\text{H}$ ) $^+$  275.0485, found: 275.0485.

### 3. Screen of Optimizations for the Acid Additives

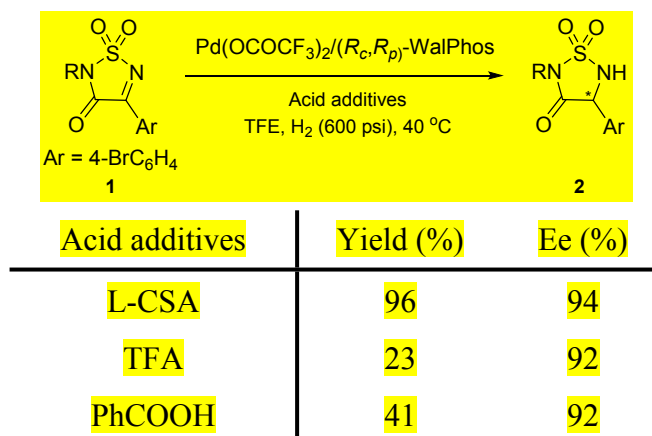

### 4. General Procedure for Asymmetric Hydrogenation

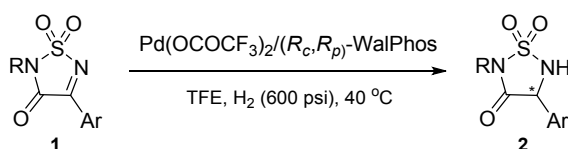

Pd(OCOCF<sub>3</sub>)<sub>2</sub> (1.3 mg, 0.004 mmol) and (*R<sub>c</sub>*,*R<sub>p</sub>*)-Walphos (4.5 mg, 0.0048 mmol) were placed in a dried Schlenk tube under nitrogen atmosphere, and degassed anhydrous acetone was added. The mixture was stirred at room temperature for 1 h, then, the solvent was removed under vacuum to give the catalyst. In a glove box, to **1** (0.20 mmol) was added the above catalyst with 3.0 mL TFE. The hydrogenation was performed at 40 °C under hydrogen gas (600 psi) in a stainless steel autoclave for 12 h. After carefully releasing the hydrogen, the autoclave was opened and the reaction mixture was evaporated in *vacuo*. Flash chromatography on silica gel using dichloromethane/methanol 100:1 as the eluent gave the products **2**.

**(*R*)-2-methyl-4-phenyl-1,2,5-thiadiazolidin-3-one 1,1-dioxide (2a)**: known compound,<sup>2</sup> yellow solid, m.p. = 69-70 °C, >99% yield, 98% ee, [α]<sub>D</sub><sup>20</sup> = -3.7 (*c* 0.90, CHCl<sub>3</sub>), R<sub>f</sub> = 0.48 (petroleum ether/ethyl acetate 3:1). <sup>1</sup>H NMR (400 MHz, CDCl<sub>3</sub>) δ 7.47-7.33 (m, 5H), 5.78 (s, 1H), 5.16 (s, 1H), 3.08 (s, 3H); <sup>13</sup>C NMR (100 MHz, CDCl<sub>3</sub>) δ 166.6, 133.5, 129.6, 129.3, 127.3, 64.1, 25.8. HPLC (AD-H column, *i*PrOH/hexane 15/85, 0.7 mL/min, 220 nm, 30 °C): t<sub>1</sub> = 11.9 min, t<sub>2</sub> = 13.4 min (major). HRMS Calculated for C<sub>9</sub>H<sub>11</sub>N<sub>2</sub>O<sub>3</sub>S (M+H)<sup>+</sup> 227.0485, found: 227.0486.

**(*R*)-2-ethyl-4-phenyl-1,2,5-thiadiazolidin-3-one 1,1-dioxide (2b)**: known compound,<sup>2</sup> yellow solid, m.p. = 94-95 °C, 98% yield, 96% ee, [α]<sub>D</sub><sup>20</sup> = +2.2 (*c* 0.94, CHCl<sub>3</sub>), R<sub>f</sub> = 0.40 (petroleum ether/ethyl acetate 3:1). <sup>1</sup>H NMR (400 MHz, CDCl<sub>3</sub>) δ 7.57-7.35 (m, 5H), 5.34 (s, 1H), 5.20 (s, 1H), 3.71 (q, *J* = 7.3 Hz, 2H), 1.37 (t, *J* = 7.3 Hz, 3H); <sup>13</sup>C NMR (100 MHz, CDCl<sub>3</sub>) δ 166.3, 133.6, 129.8, 129.5, 127.4, 63.9, 36.9, 13.6. HPLC (IC column, *i*PrOH/hexane 10/90, 0.7 mL/min, 220 nm, 30 °C): t<sub>1</sub> = 11.5 min, t<sub>2</sub> = 12.6 min (major). HRMS Calculated for C<sub>10</sub>H<sub>13</sub>N<sub>2</sub>O<sub>3</sub>S (M+H)<sup>+</sup> 241.0641, found: 241.0643.

**(*R*)-2-benzyl-4-phenyl-1,2,5-thiadiazolidin-3-one 1,1-dioxide (2c)**: New compound, white solid, m.p. = 82-83 °C, 94% yield, 94% ee, [α]<sub>D</sub><sup>20</sup> = +19.4 (*c* 1.14, CHCl<sub>3</sub>), R<sub>f</sub> = 0.48 (petroleum ether/ethyl acetate 3:1). <sup>1</sup>H NMR (400 MHz, CDCl<sub>3</sub>) δ 7.53-7.28 (m, 10H), 5.27 (s, 1H), 5.16 (s,

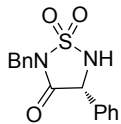
 1H), 4.74 (s, 2H); <sup>13</sup>C NMR (100 MHz, CDCl<sub>3</sub>) δ 166.6, 134.0, 133.4, 129.7, 129.4, 129.0, 129.0, 128.8, 127.3, 63.7, 45.1. HPLC (AD-H column, <sup>i</sup>PrOH/hexane 15/85, 0.7 mL/min, 220 nm, 30 °C): t<sub>1</sub> = 18.5 min, t<sub>2</sub> = 19.6 min (major). HRMS Calculated for C<sub>15</sub>H<sub>15</sub>N<sub>2</sub>O<sub>3</sub>S (M+H)<sup>+</sup> 303.0798, found: 303.0796.

**(R)-2-methyl-4-(p-tolyl)-1,2,5-thiadiazolidin-3-one 1,1-dioxide (2d):** New compound, yellow solid, m.p. = 103-104 °C, >99% yield, 97% ee, [α]<sup>20</sup><sub>D</sub> = +3.5 (c 0.95, CHCl<sub>3</sub>), R<sub>f</sub> = 0.52 (petroleum ether/ethyl acetate 3:1). <sup>1</sup>H NMR (400 MHz, CDCl<sub>3</sub>) δ 7.32 (d, J = 8.1 Hz, 2H), 7.22 (d, J = 8.0 Hz, 2H), 5.27 (s, 1H), 5.18 (s, 1H), 3.15 (s, 3H), 2.36 (s, 3H); <sup>13</sup>C NMR (100 MHz, CDCl<sub>3</sub>) δ 166.7, 139.9, 130.4, 130.2, 127.3, 64.2, 25.9, 21.4. HPLC (AD-H column, <sup>i</sup>PrOH/hexane 15/85, 0.7 mL/min, 220 nm, 30 °C): t<sub>1</sub> = 12.7 min, t<sub>2</sub> = 14.5 min (major). HRMS Calculated for C<sub>10</sub>H<sub>13</sub>N<sub>2</sub>O<sub>3</sub>S (M+H)<sup>+</sup> 241.0641, found: 241.0642.

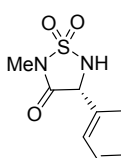
**(R)-2-methyl-4-(m-tolyl)-1,2,5-thiadiazolidin-3-one 1,1-dioxide (2e):** New compound, yellow solid, m.p. = 81-82 °C, 98% yield, 98% ee, [α]<sup>20</sup><sub>D</sub> = -2.4 (c 0.95, CHCl<sub>3</sub>), R<sub>f</sub> = 0.61 (dichloromethane). <sup>1</sup>H NMR (400 MHz, CDCl<sub>3</sub>) δ 7.34-7.27 (m, 1H), 7.26-7.18 (m, 3H), 5.38 (s, 1H), 5.17 (s, 1H), 3.16 (s, 3H), 2.37 (s, 3H); <sup>13</sup>C NMR (100 MHz, CDCl<sub>3</sub>) δ 166.6, 139.5, 133.3, 130.6, 129.4, 128.0, 124.5, 64.4, 25.9, 21.6. HPLC (AD-H column, <sup>i</sup>PrOH/hexane 15/85, 0.7 mL/min, 220 nm, 30 °C): t<sub>1</sub> = 12.1 min, t<sub>2</sub> = 13.8 min (major). HRMS Calculated for C<sub>10</sub>H<sub>13</sub>N<sub>2</sub>O<sub>3</sub>S (M+H)<sup>+</sup> 241.0641, found: 241.0641.

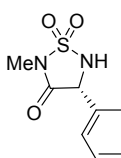
**(R)-2-methyl-4-(o-tolyl)-1,2,5-thiadiazolidin-3-one 1,1-dioxide (2f):** New compound, yellow solid, m.p. = 145-146 °C, 99% yield, 80% ee, [α]<sup>20</sup><sub>D</sub> = +28.6 (c 0.94, CHCl<sub>3</sub>), R<sub>f</sub> = 0.60 (dichloromethane). <sup>1</sup>H NMR (400 MHz, CDCl<sub>3</sub>) δ 7.35-7.21 (m, 4H), 5.48 (s, 1H), 4.97 (s, 1H), 3.20 (s, 3H), 2.45 (s, 3H); <sup>13</sup>C NMR (100 MHz, CDCl<sub>3</sub>) δ 167.0, 137.5, 131.8, 131.6, 130.1, 127.4, 127.3, 61.9, 26.0, 19.6. HPLC (AS-H column, <sup>i</sup>PrOH/hexane 30/70, 0.7 mL/min, 220 nm, 30 °C): t<sub>1</sub> = 13.1 min (major), t<sub>2</sub> = 16.6 min. HRMS Calculated for C<sub>10</sub>H<sub>13</sub>N<sub>2</sub>O<sub>3</sub>S (M+H)<sup>+</sup> 241.0641, found: 241.0643.

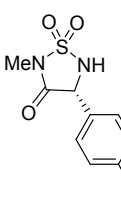
**(R)-4-(4-fluorophenyl)-2-methyl-1,2,5-thiadiazolidin-3-one 1,1-dioxide (2g):** New compound, yellow solid, m.p. = 108-109 °C, 99% yield, 97% ee, [α]<sup>20</sup><sub>D</sub> = -7.9 (c 0.96, CHCl<sub>3</sub>), R<sub>f</sub> = 0.20 (dichloromethane). <sup>1</sup>H NMR (400 MHz, CDCl<sub>3</sub>) δ 7.51-7.43 (m, 2H), 7.16-7.06 (m, 2H), 5.42 (s, 1H), 5.26 (s, 1H), 3.16 (s, 3H); <sup>13</sup>C NMR (100 MHz, CDCl<sub>3</sub>) δ 166.2, 163.5 (d, J<sub>FC</sub> = 249.4 Hz), 129.3 (d, J<sub>FC</sub> = 8.5 Hz), 129.1 (d, J<sub>FC</sub> = 3.3 Hz), 116.5 (d, J<sub>FC</sub> = 22.0 Hz), 63.5, 26.0. <sup>19</sup>F NMR (376 MHz, CDCl<sub>3</sub>) δ -111.5. HPLC (AD-H column, <sup>i</sup>PrOH/hexane 15/85, 0.7 mL/min, 220 nm, 30 °C): t<sub>1</sub> = 11.8 min, t<sub>2</sub> = 13.3 min (major). HRMS Calculated for C<sub>9</sub>H<sub>10</sub>FN<sub>2</sub>O<sub>3</sub>S (M+H)<sup>+</sup> 245.0391, found: 245.0391.

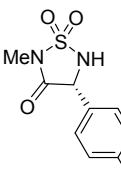
**(R)-4-(4-chlorophenyl)-2-methyl-1,2,5-thiadiazolidin-3-one 1,1-dioxide (2h):** New compound, yellow solid, m.p. = 100-101 °C, 99% yield, 96% ee, [α]<sup>20</sup><sub>D</sub> = -5.9 (c 0.97, CHCl<sub>3</sub>), R<sub>f</sub> = 0.26 (dichloromethane). <sup>1</sup>H NMR (400 MHz, CDCl<sub>3</sub>) δ 7.46-7.33 (m, 4H), 5.66 (s, 1H), 5.23 (s, 1H), 3.14 (s, 3H); <sup>13</sup>C NMR (100 MHz, CDCl<sub>3</sub>) δ 166.0, 135.8, 131.8, 129.6, 128.6, 63.4, 26.0. HPLC (AD-H column, <sup>i</sup>PrOH/hexane 10/90, 0.7 mL/min, 220 nm, 30 °C): t<sub>1</sub> = 18.0 min, t<sub>2</sub> = 19.8 min (major). HRMS Calculated for C<sub>9</sub>H<sub>10</sub>ClN<sub>2</sub>O<sub>3</sub>S (M+H)<sup>+</sup> 261.0095, found: 261.0095.

**(R)-4-(4-bromophenyl)-2-methyl-1,2,5-thiadiazolidin-3-one 1,1-dioxide (2i):** New compound,

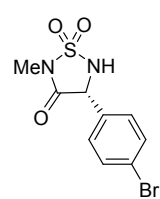

yellow solid, m.p. = 95-96 °C, 96% yield, 94% ee,  $[\alpha]_D^{20} = -5.7$  (*c* 1.21, CHCl<sub>3</sub>),  $R_f = 0.21$  (DCM). <sup>1</sup>H NMR (400 MHz, CDCl<sub>3</sub>) δ 7.55 (d, *J* = 8.5 Hz, 2H), 7.37 (d, *J* = 8.5 Hz, 2H), 5.46 (s, 1H), 5.23 (s, 1H), 3.15 (s, 3H); <sup>13</sup>C NMR (100 MHz, CDCl<sub>3</sub>) δ 166.0, 132.5, 132.3, 128.9, 124.0, 63.4, 26.0. HPLC (AD-H column, <sup>i</sup>PrOH/hexane 10/90, 0.7 mL/min, 220 nm, 30 °C): *t*<sub>1</sub> = 19.8 min, *t*<sub>2</sub> = 21.4 min (major). HRMS Calculated for C<sub>9</sub>H<sub>10</sub>BrN<sub>2</sub>O<sub>3</sub>S (M+H)<sup>+</sup> 304.9590, found: 304.9591.

**(R)-4-(4-methoxyphenyl)-2-methyl-1,2,5-thiadiazolidin-3-one 1,1-dioxide (2j):** New compound, yellow solid, m.p. = 111-112 °C, 98% yield, 97% ee,  $[\alpha]_D^{20} = +8.1$  (*c* 0.80, CHCl<sub>3</sub>),  $R_f = 0.50$  (dichloromethane). <sup>1</sup>H NMR (400 MHz, CDCl<sub>3</sub>) δ 7.36 (d, *J* = 8.7 Hz, 2H), 6.93 (d, *J* = 8.8 Hz, 2H), 5.20 (s, 1H), 5.08 (s, 1H), 3.81 (s, 3H), 3.18 (s, 3H); <sup>13</sup>C NMR (100 MHz, CDCl<sub>3</sub>) δ 166.9, 160.8, 128.9, 125.3, 114.9, 64.0, 55.6, 25.9. HPLC (AD-H column, <sup>i</sup>PrOH/hexane 15/85, 0.7 mL/min, 220 nm, 30 °C): *t*<sub>1</sub> = 17.1 min, *t*<sub>2</sub> = 18.6 min (major). HRMS Calculated for C<sub>10</sub>H<sub>13</sub>N<sub>2</sub>O<sub>4</sub>S (M+H)<sup>+</sup> 257.0591, found: 257.0594.

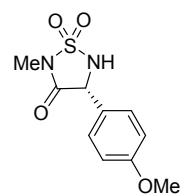

**(R)-2-methyl-4-(naphthalen-2-yl)-1,2,5-thiadiazolidin-3-one 1,1-dioxide (2k):** New compound, yellow solid, m.p. = 153-154 °C, 95% yield, 93% ee,  $[\alpha]_D^{20} = +2.0$  (*c* 1.04, CHCl<sub>3</sub>),  $R_f = 0.42$  (dichloromethane). <sup>1</sup>H NMR (400 MHz, CDCl<sub>3</sub>) δ 7.90 (s, 1H), 7.88-7.80 (m, 3H), 7.56-7.44 (m, 3H), 5.51 (s, 1H), 5.35 (s, 1H), 3.16 (s, 3H); <sup>13</sup>C NMR (100 MHz, CDCl<sub>3</sub>) δ 166.4, 133.7, 133.2, 130.6, 129.6, 128.4, 128.0, 127.3, 127.1, 124.0, 64.5, 26.0. HPLC (OJ-H column, <sup>i</sup>PrOH/hexane 30/70, 0.7 mL/min, 220 nm, 30 °C): *t*<sub>1</sub> = 37.6 min (major), *t*<sub>2</sub> = 46.2 min. HRMS Calculated for C<sub>13</sub>H<sub>13</sub>N<sub>2</sub>O<sub>3</sub>S (M+H)<sup>+</sup> 277.0641, found: 277.0641.

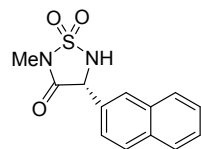

## 5. Gram Scale Experiment

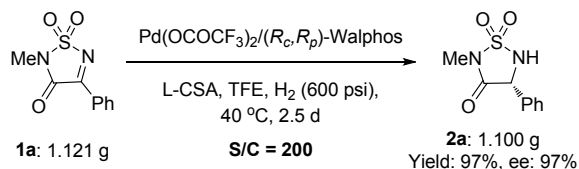

Pd(OCOCF<sub>3</sub>)<sub>2</sub> (8.3 mg, 0.025 mmol) and (*R<sub>c</sub>*,*R<sub>p</sub>*)-Walphos (28 mg, 0.030 mmol) were placed in a dried Schlenk tube under nitrogen atmosphere, and degassed anhydrous acetone was added. The mixture was stirred at room temperature for 1 h, then, the solvent was removed under vacuum to give the catalyst. In a glove box, to the mixture of **1a** (1.121 g, 5.0 mmol) and L-CSA (0.116 g, 0.5 mmol) was added the above catalyst with 25 mL TFE. The hydrogenation was performed at 40 °C under hydrogen (600 psi) in a stainless steel autoclave for 2.5 d. After carefully releasing the hydrogen, the autoclave was opened and the reaction mixture was evaporated in *vacuo*. Flash chromatography on silica gel using dichloromethane/methanol 100:1 as the eluent gave the product **2a** with 97% yield and 97% ee.

## 6. Determination of the Absolute Configuration of **2a**

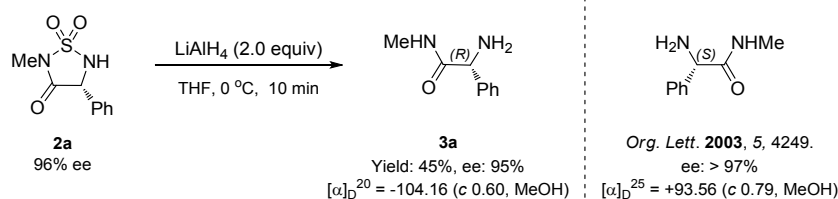

To a suspension of LiAlH<sub>4</sub> (30 mg, 0.8 mmol, 2.0 equiv) in THF (2 mL), a solution of **2a** (93 mg, 0.4 mmol, 1.0 equiv) in THF (4 mL) was added dropwise at 0 °C. After stirring for 10 min, the mixture was cooled, quenched with ice water and 10% sodium hydroxide was then added. The aqueous layer was extracted with ethyl acetate, washed with brine, dried over sodium sulfate, and concentrated under reduced pressure. The residue was purified by silica gel column chromatography to afford compound **3a**.

**(R)-2-Amino-N-methyl-2-phenylacetamide**: 30 mg, 45% yield, 95% ee, [α]<sup>20</sup><sub>D</sub> = -104.16 (c 0.60, MeOH), [lit.<sup>3</sup>: [α]<sup>25</sup><sub>D</sub> = +93.56 (c 0.79, MeOH) for the (S)-enantiomer], known compound,<sup>3</sup> yellow oil, R<sub>f</sub> = 0.20 (dichloromethane/methanol 15/1). <sup>1</sup>H NMR (400 MHz, CDCl<sub>3</sub>) δ 7.43-7.27 (m, 5H), 7.21 (brs, 1H), 4.58 (s, 1H), 2.78 (d, J = 4.9 Hz, 3H), 2.65 (brs, 2H); <sup>13</sup>C NMR (100 MHz, CDCl<sub>3</sub>) δ 173.5, 140.7, 129.0, 128.2, 127.1, 59.7, 26.2. HPLC (AS-H column, *i*PrOH/hexane 30/70, 0.7 mL/min, 220 nm, 30 °C): t<sub>1</sub> = 16.3 min (major), t<sub>2</sub> = 23.3 min.

## 7. References

- [1]. Nishimura, T.; Ebe, Y.; Fujimoto, H.; Hayashi, T. *Chem. Commun.* **2013**, 49, 5504.
- [2]. Unterhalt, B.; Hanewacker, G.-A. *Arch. Pharm. (Weinheim)* **1988**, 321, 749.
- [3]. Reichard, G. A.; Stengone, C.; Paliwal, S.; Mergelsberg, I.; Majmundar, S.; Wang, C.; Tiberi, R.; McPhail, A. T.; Piwinski, J. J.; Shih, N.-Y. *Org. Lett.* **2003**, 5, 4249.

## 8. Copy of NMR and HPLC for the Compounds

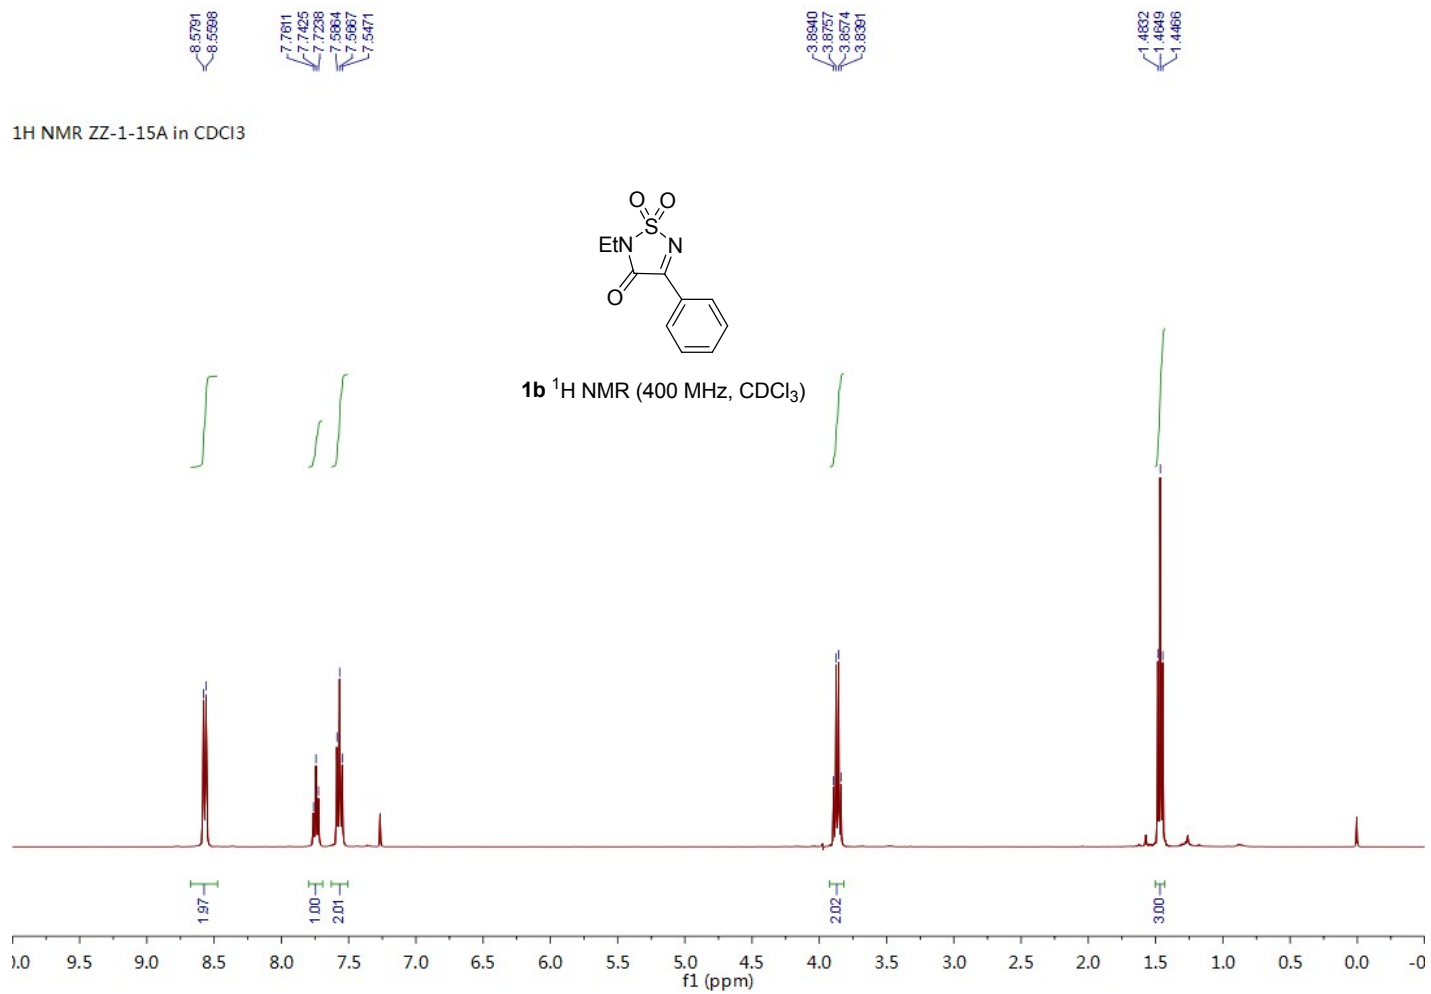



164.80

156.13

136.42

132.30

129.53

127.05

37.56

13.23

<sup>13</sup>C NMR ZZ-1-15A in CDCl<sub>3</sub>

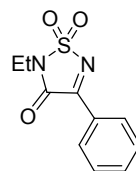

**1b** <sup>13</sup>C NMR (100 MHz, CDCl<sub>3</sub>)

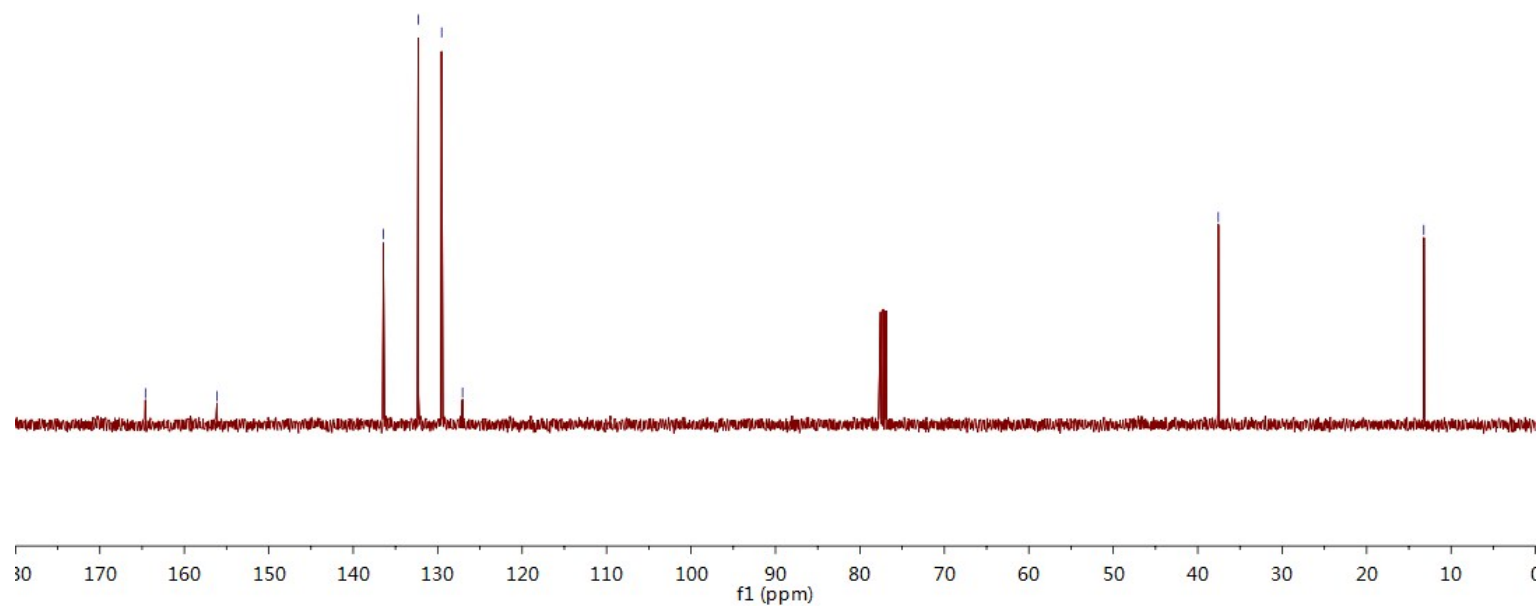

8.5756  
8.5572  
7.7561  
7.7374  
7.7187  
7.6786  
7.5967  
7.5372  
7.4983  
7.4942  
7.4785  
7.4101  
7.4003  
7.3884  
7.3693  
7.3533  
7.3343

4.9090

<sup>1</sup>H NMR ZZ-1-16B in CDCl<sub>3</sub>

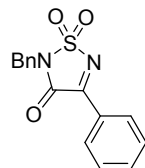

**1c** <sup>1</sup>H NMR (400 MHz, CDCl<sub>3</sub>)

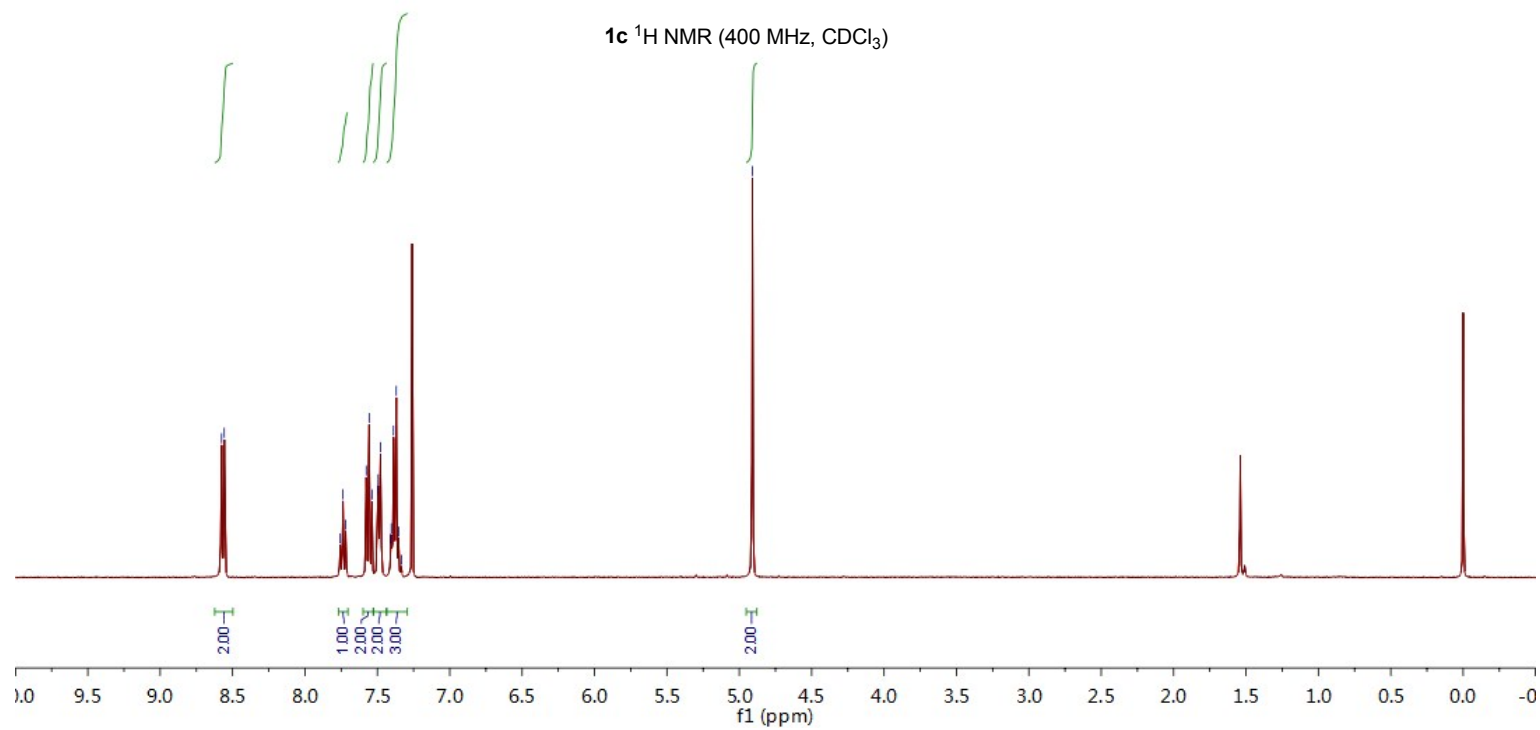

164.55  
156.36  
136.55  
133.19  
132.36  
129.55  
129.20  
129.11  
129.02  
126.98

45.84

<sup>13</sup>C NMR ZZ-1-16B in CDCl<sub>3</sub>

129.55  
129.20  
129.11  
129.02

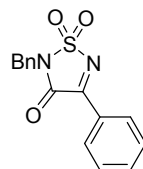

**1c** <sup>13</sup>C NMR (100 MHz, CDCl<sub>3</sub>)

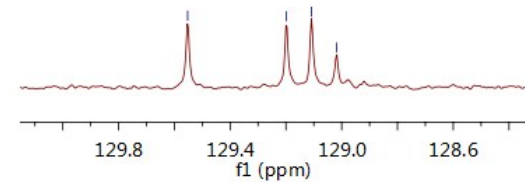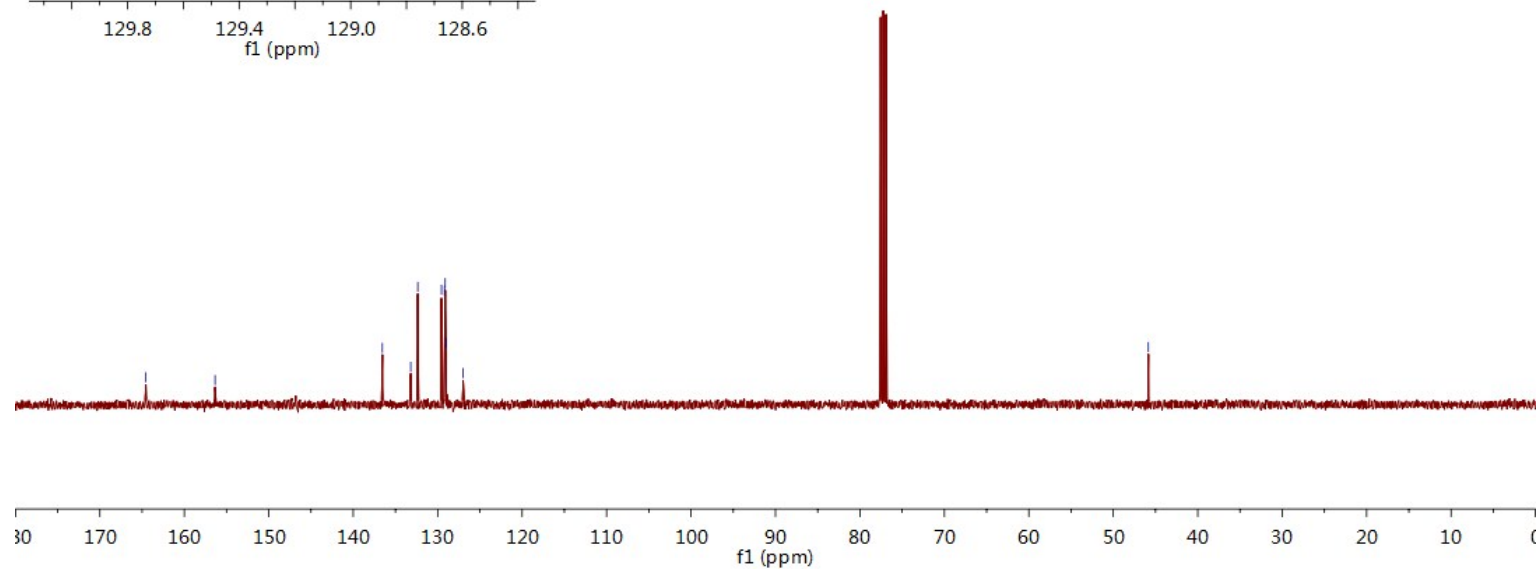

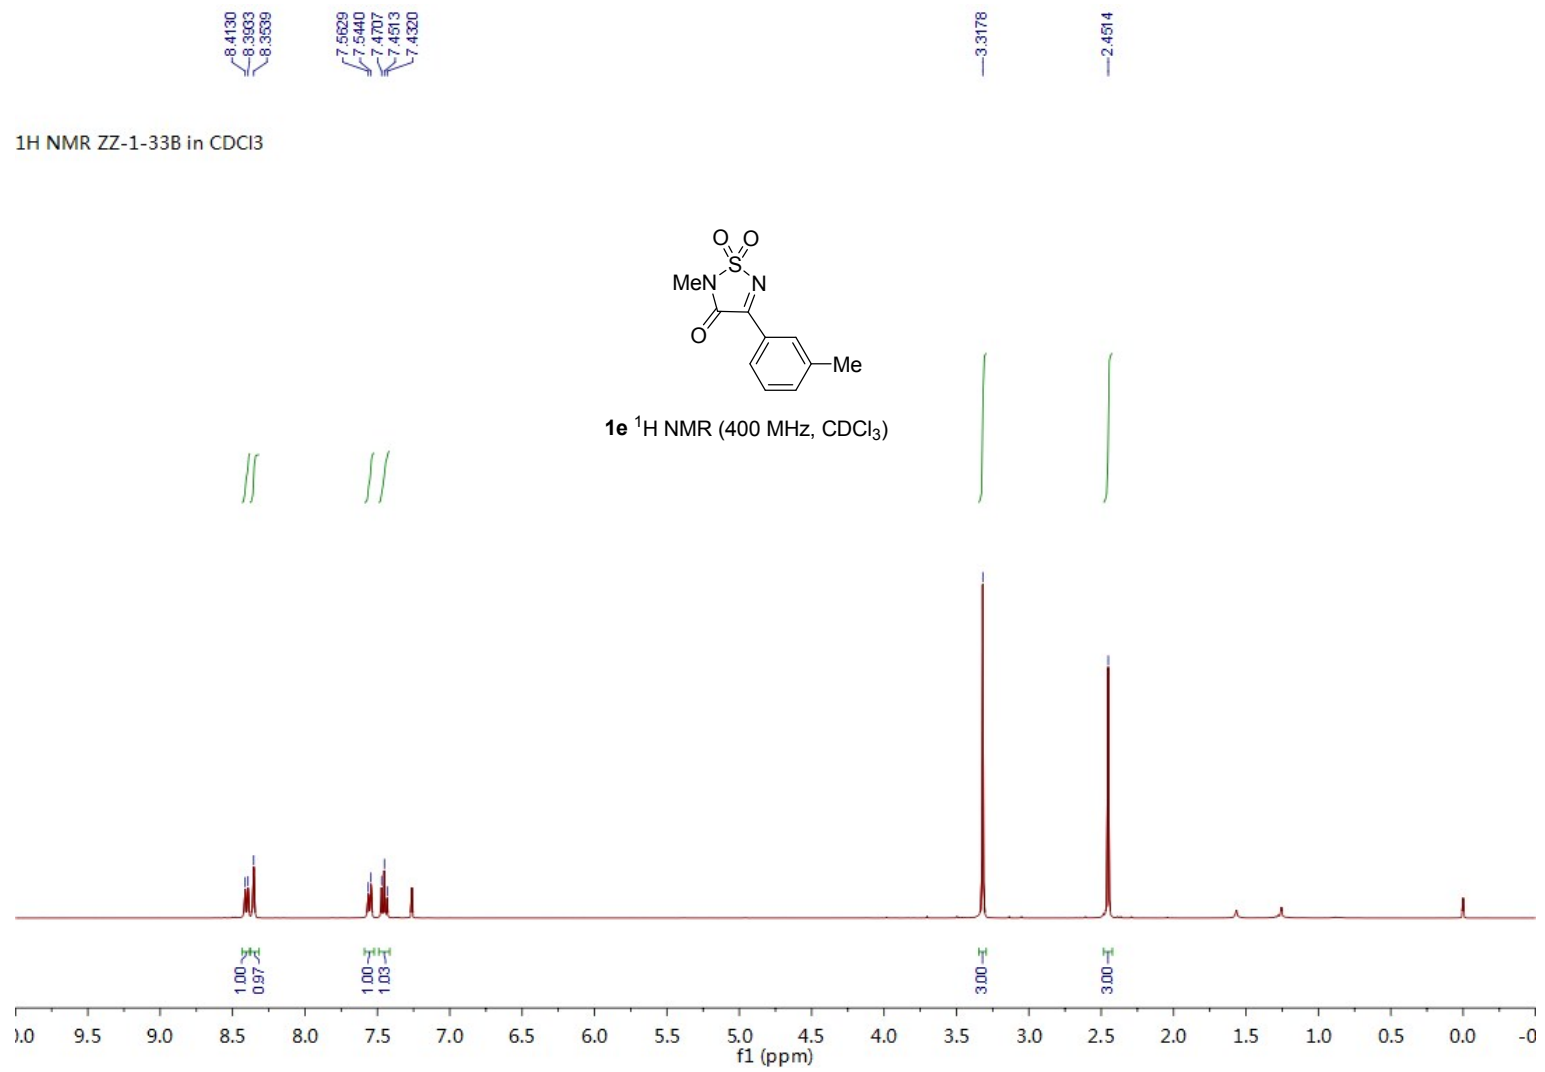

164.97

156.30

139.61

137.54

132.51

129.82

129.46

126.92

26.40

21.54

$^{13}\text{C}$  NMR ZZ-1-33B in  $\text{CDCl}_3$

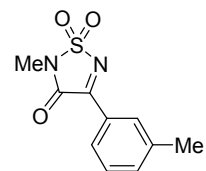

**1e**  $^{13}\text{C}$  NMR (100 MHz,  $\text{CDCl}_3$ )

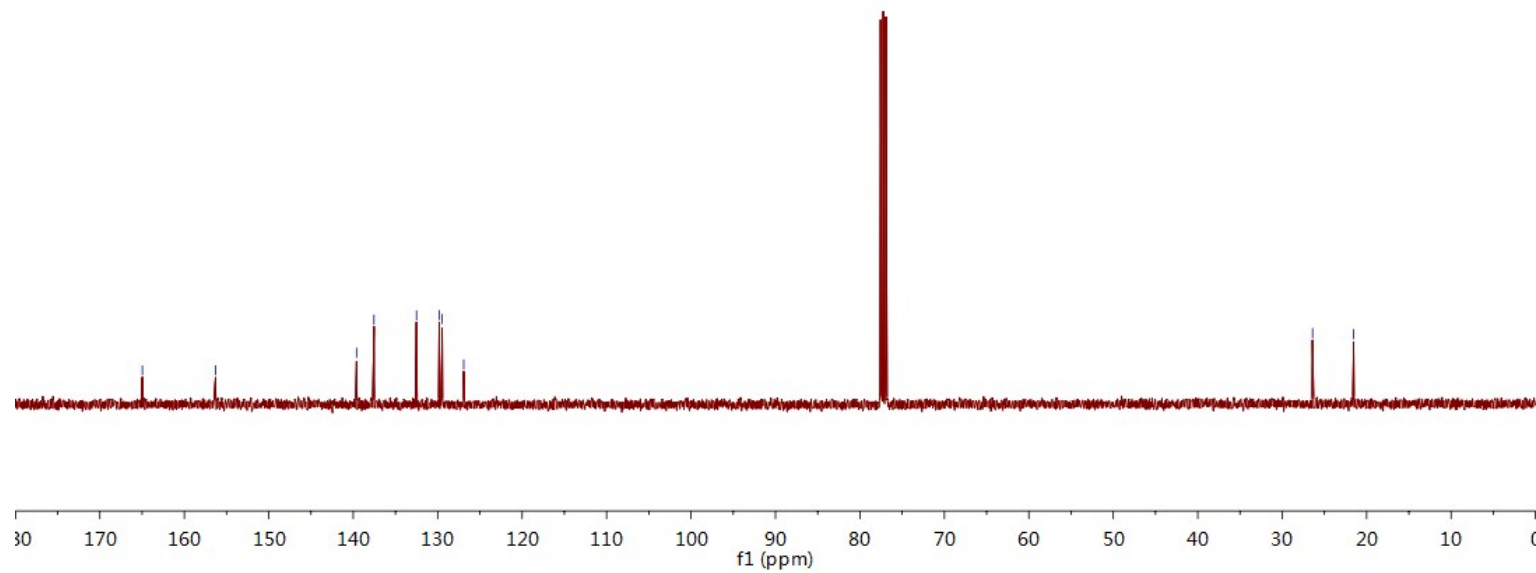

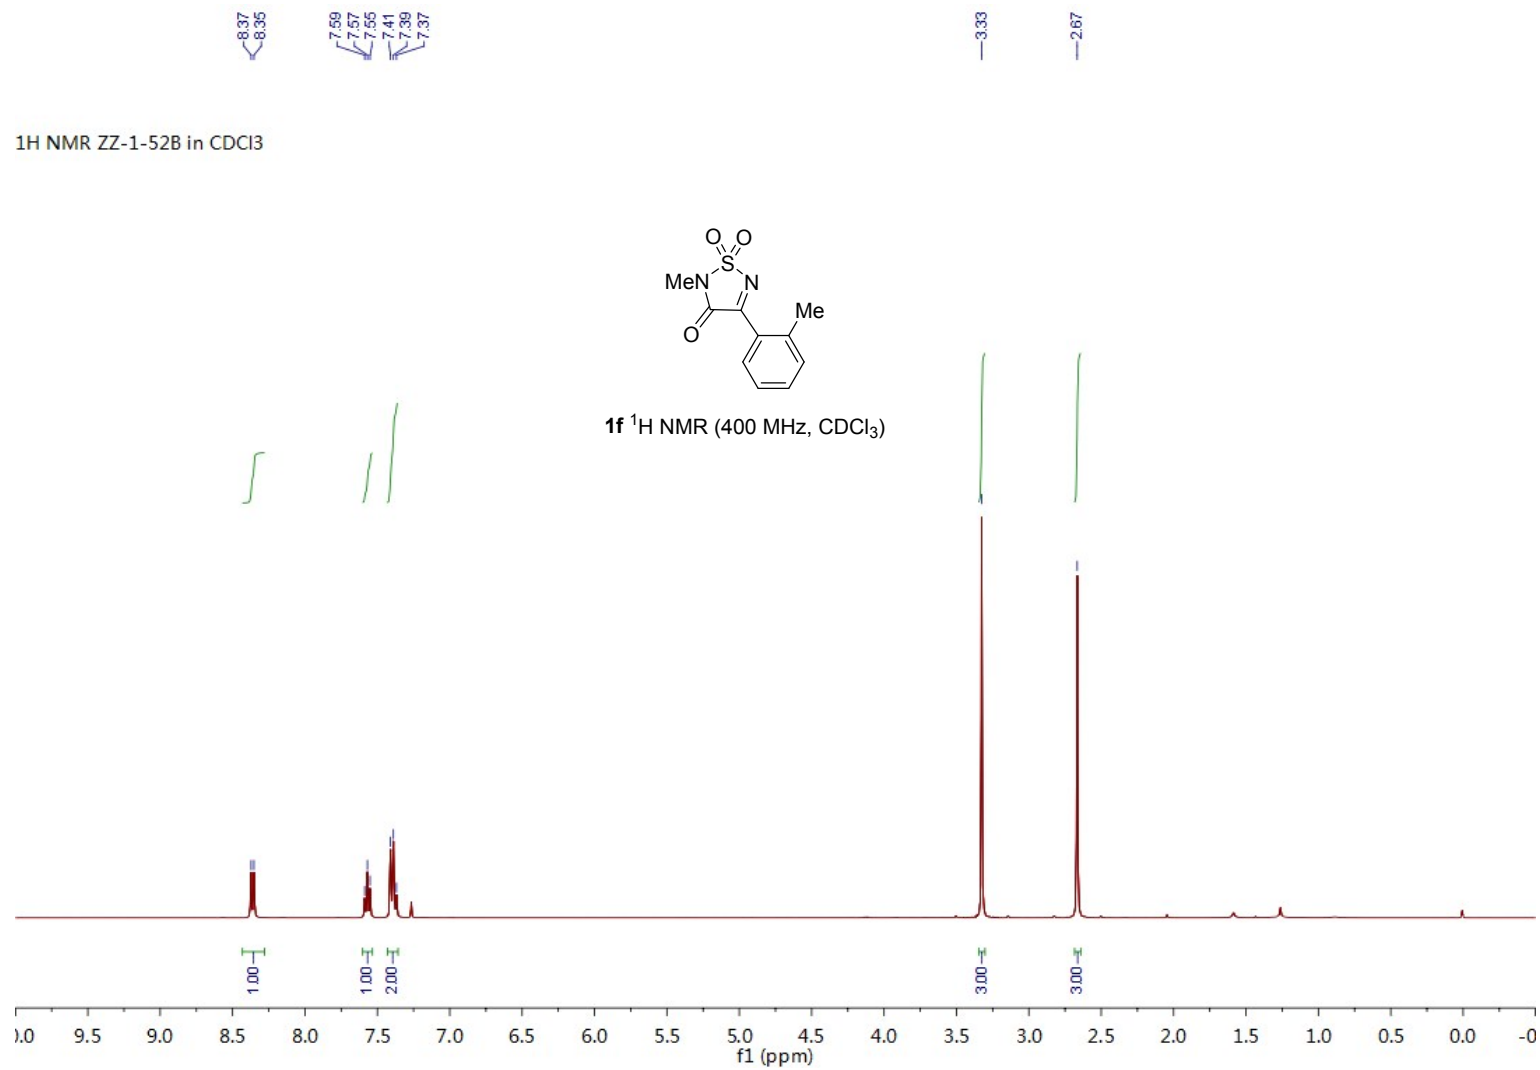

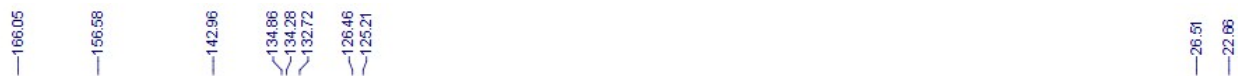

$^{13}\text{C}$  NMR ZZ-1-52B in  $\text{CDCl}_3$

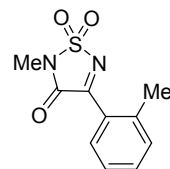

**1f**  $^{13}\text{C}$  NMR (100 MHz,  $\text{CDCl}_3$ )

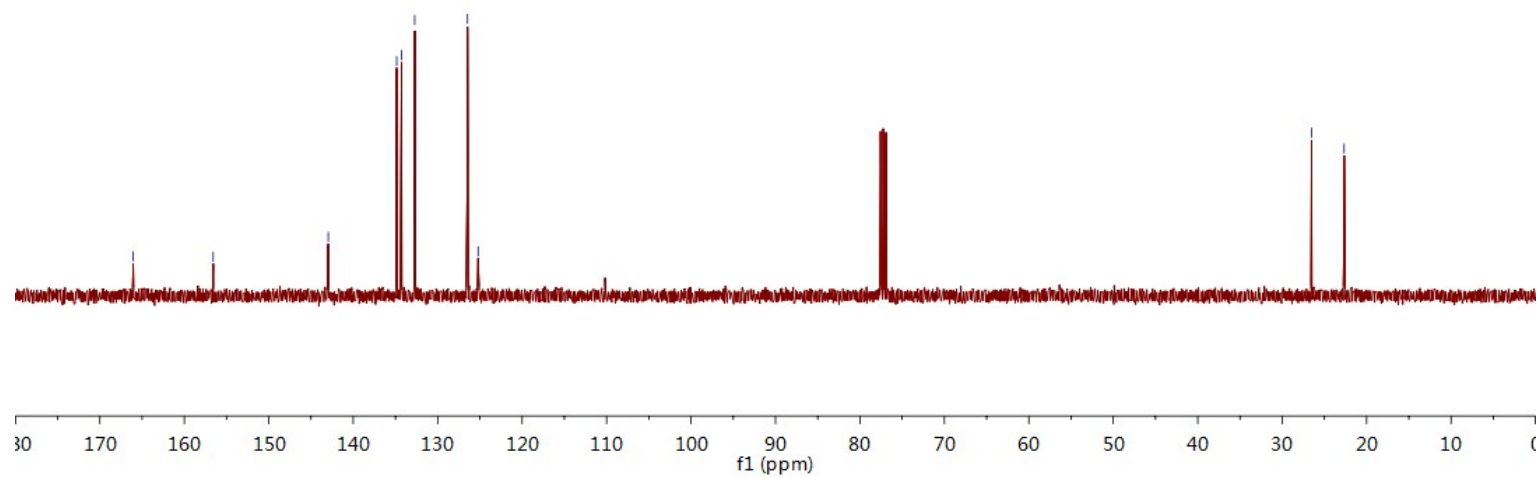

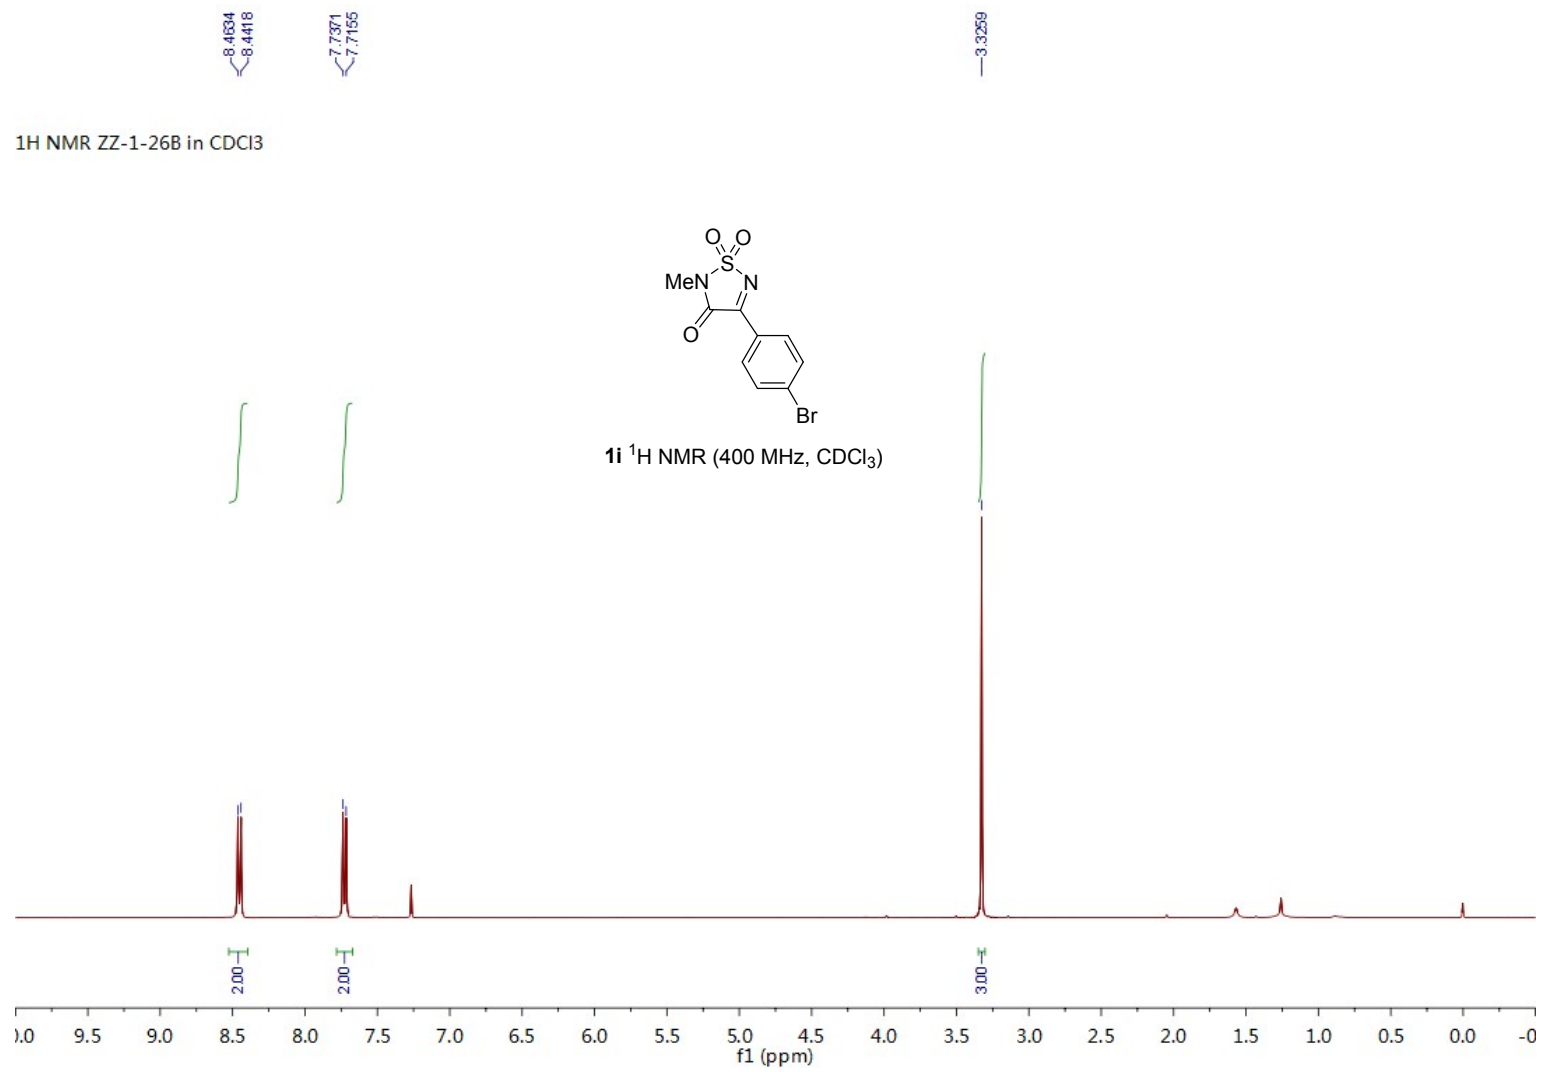



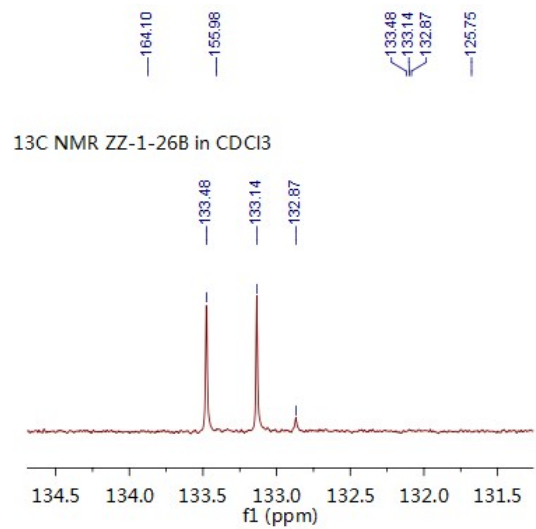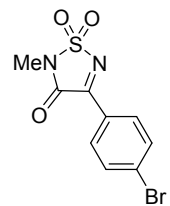

**1i** <sup>13</sup>C NMR (100 MHz, CDCl<sub>3</sub>)

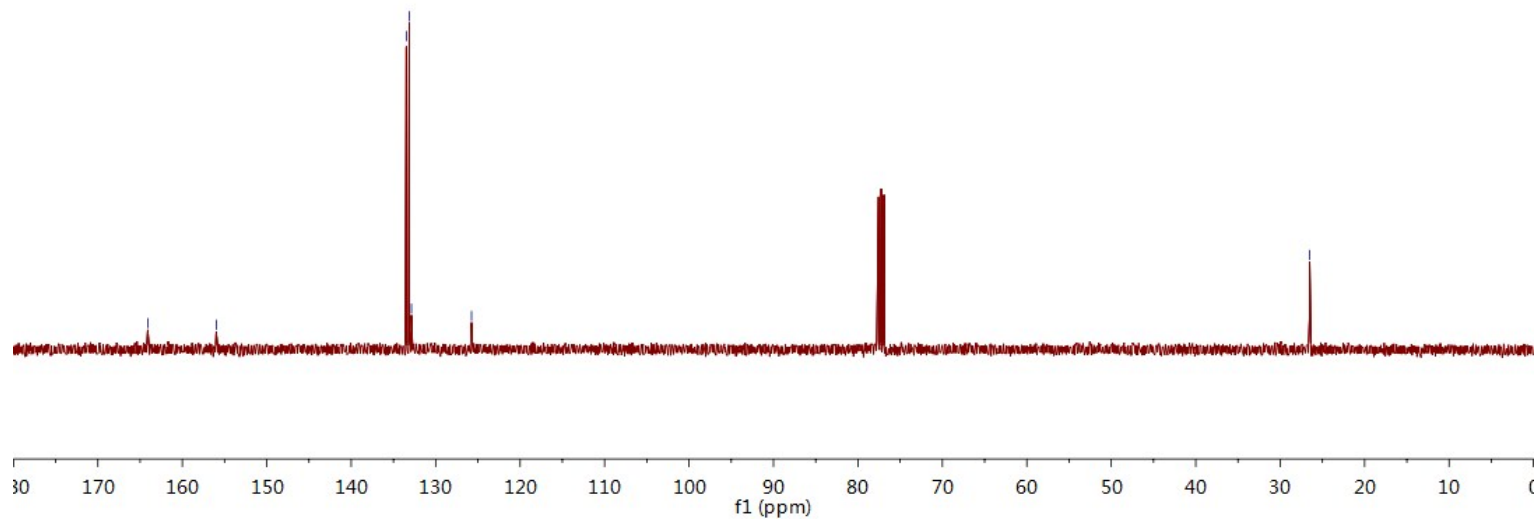

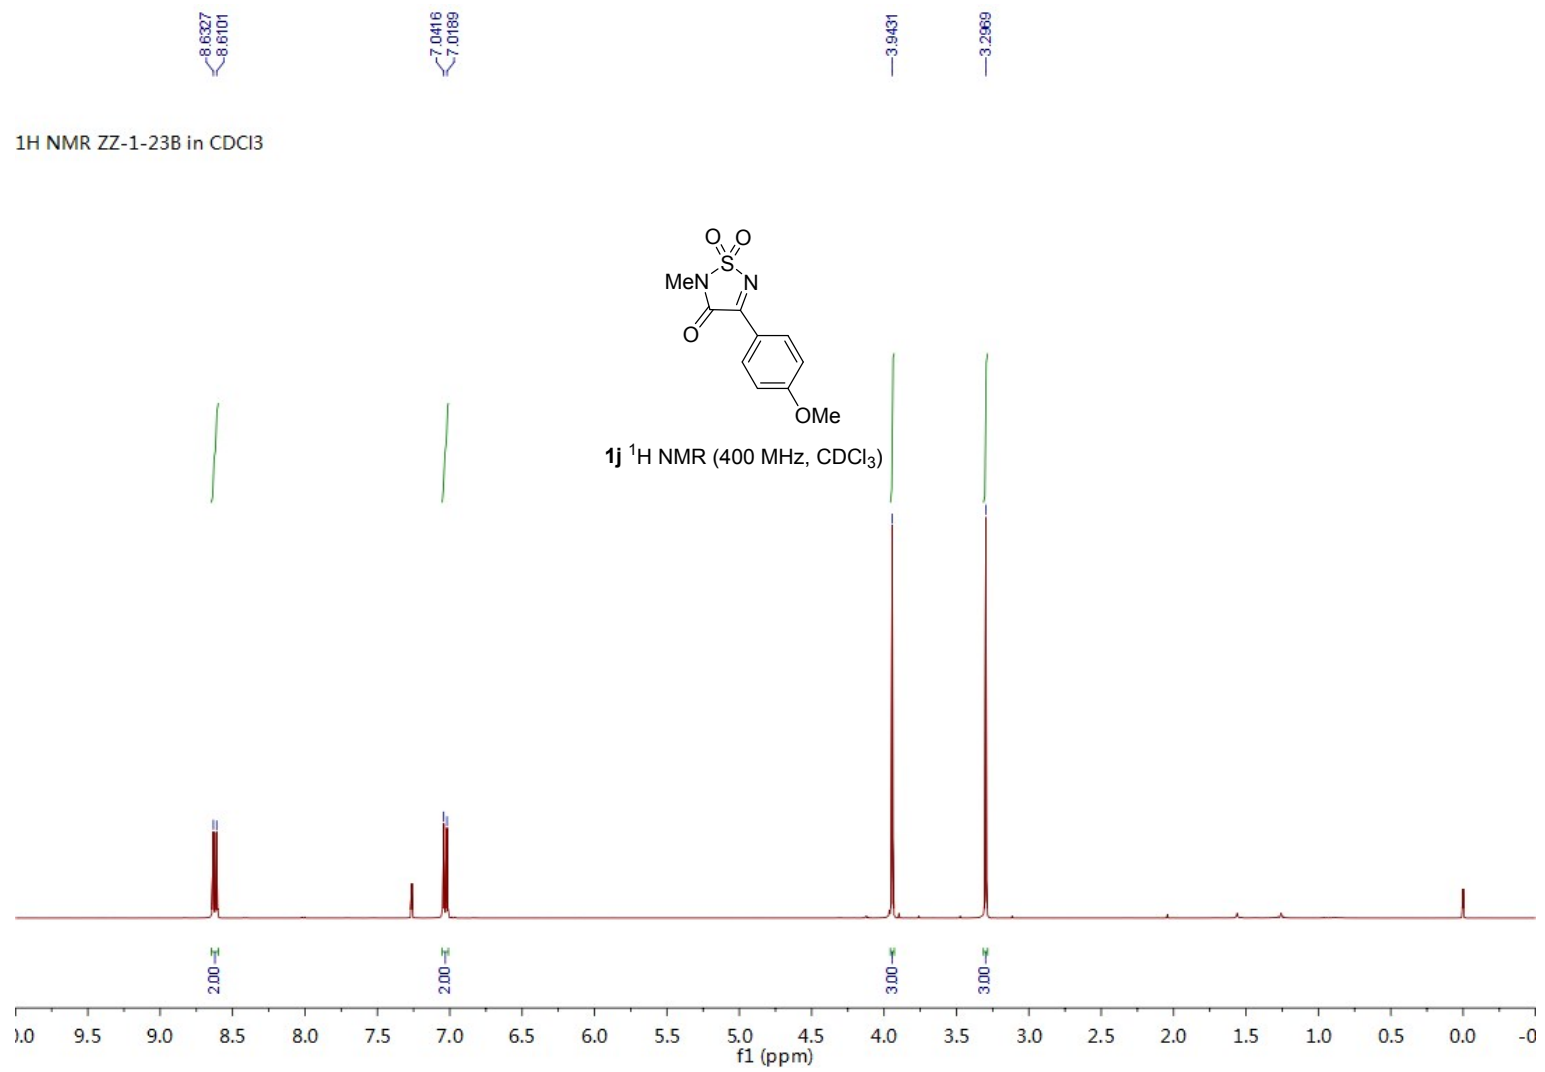

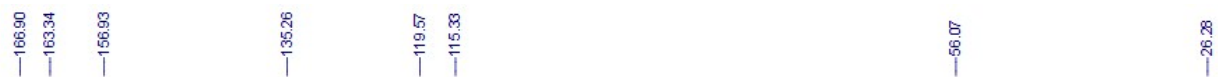

<sup>13</sup>C NMR ZZ-1-23B in CDCl<sub>3</sub>

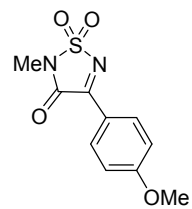

**1j** <sup>13</sup>C NMR (100 MHz, CDCl<sub>3</sub>)

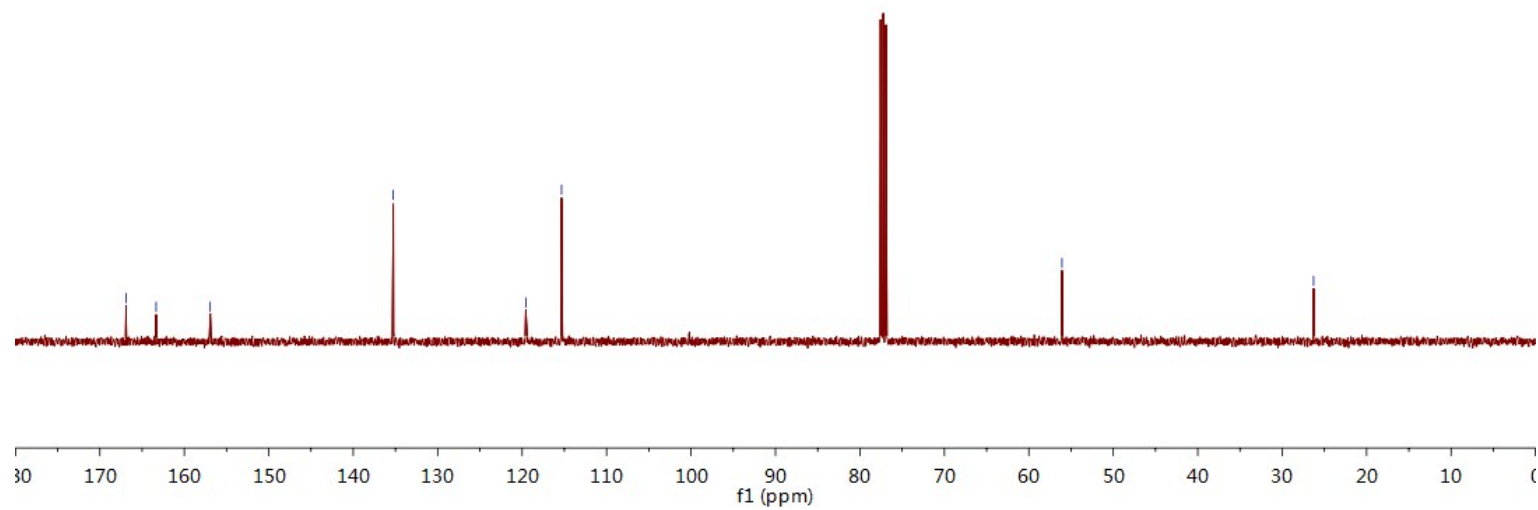

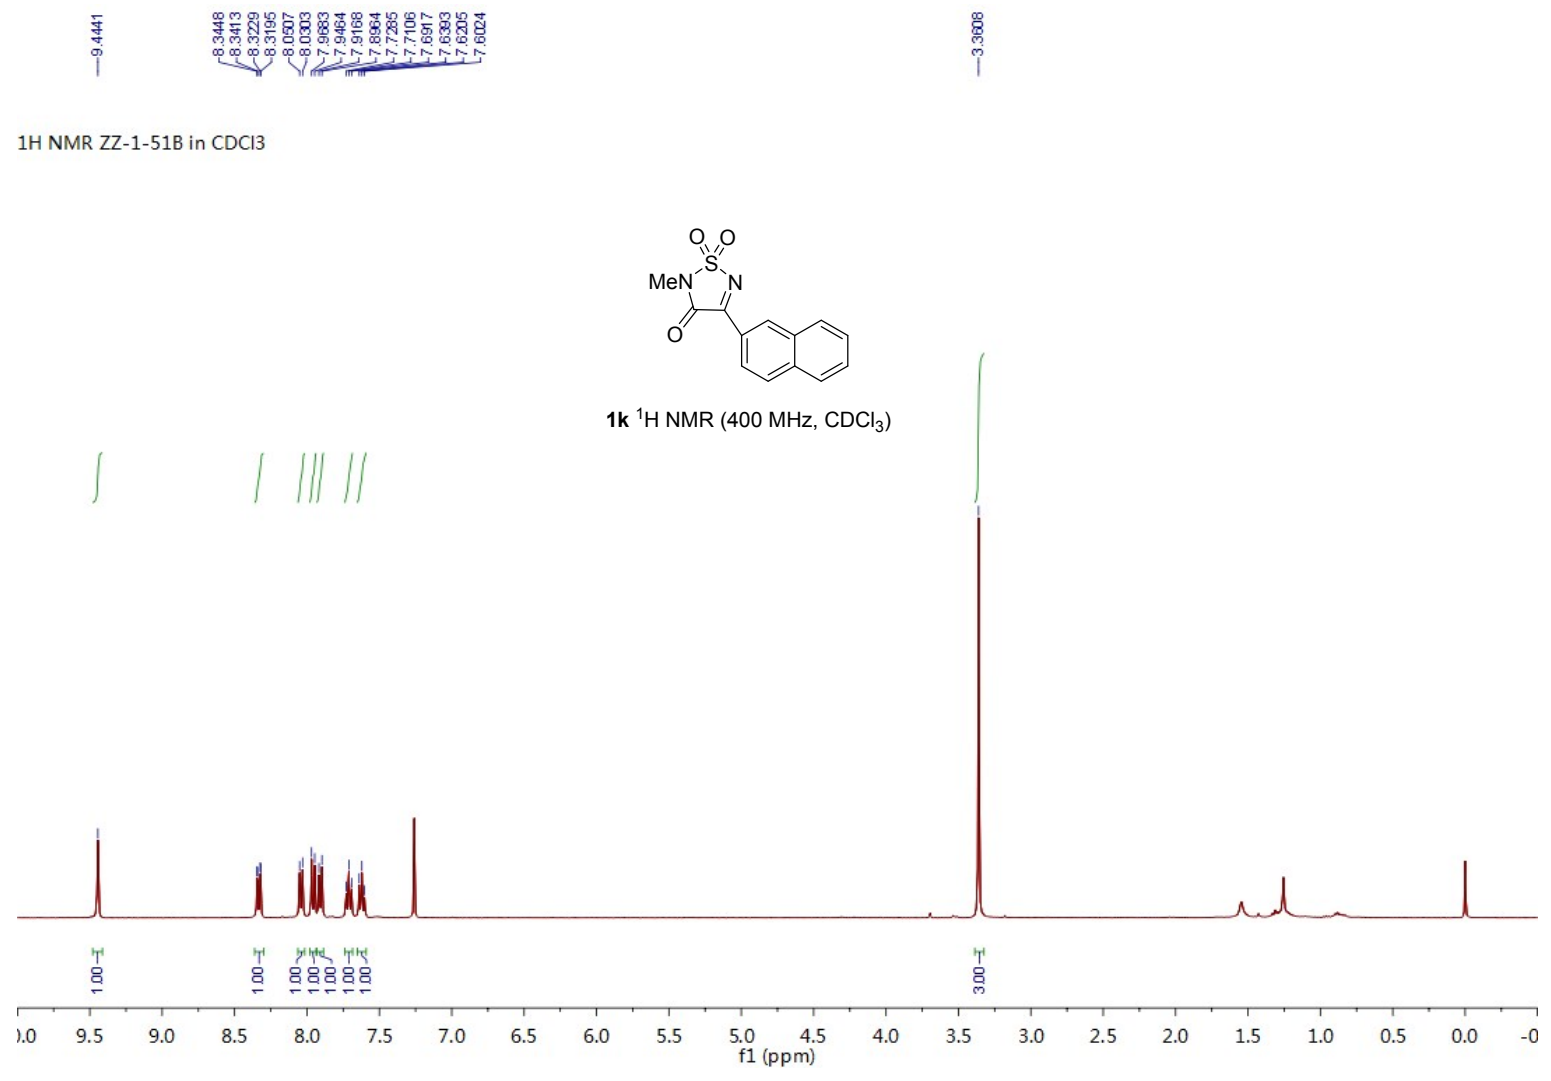

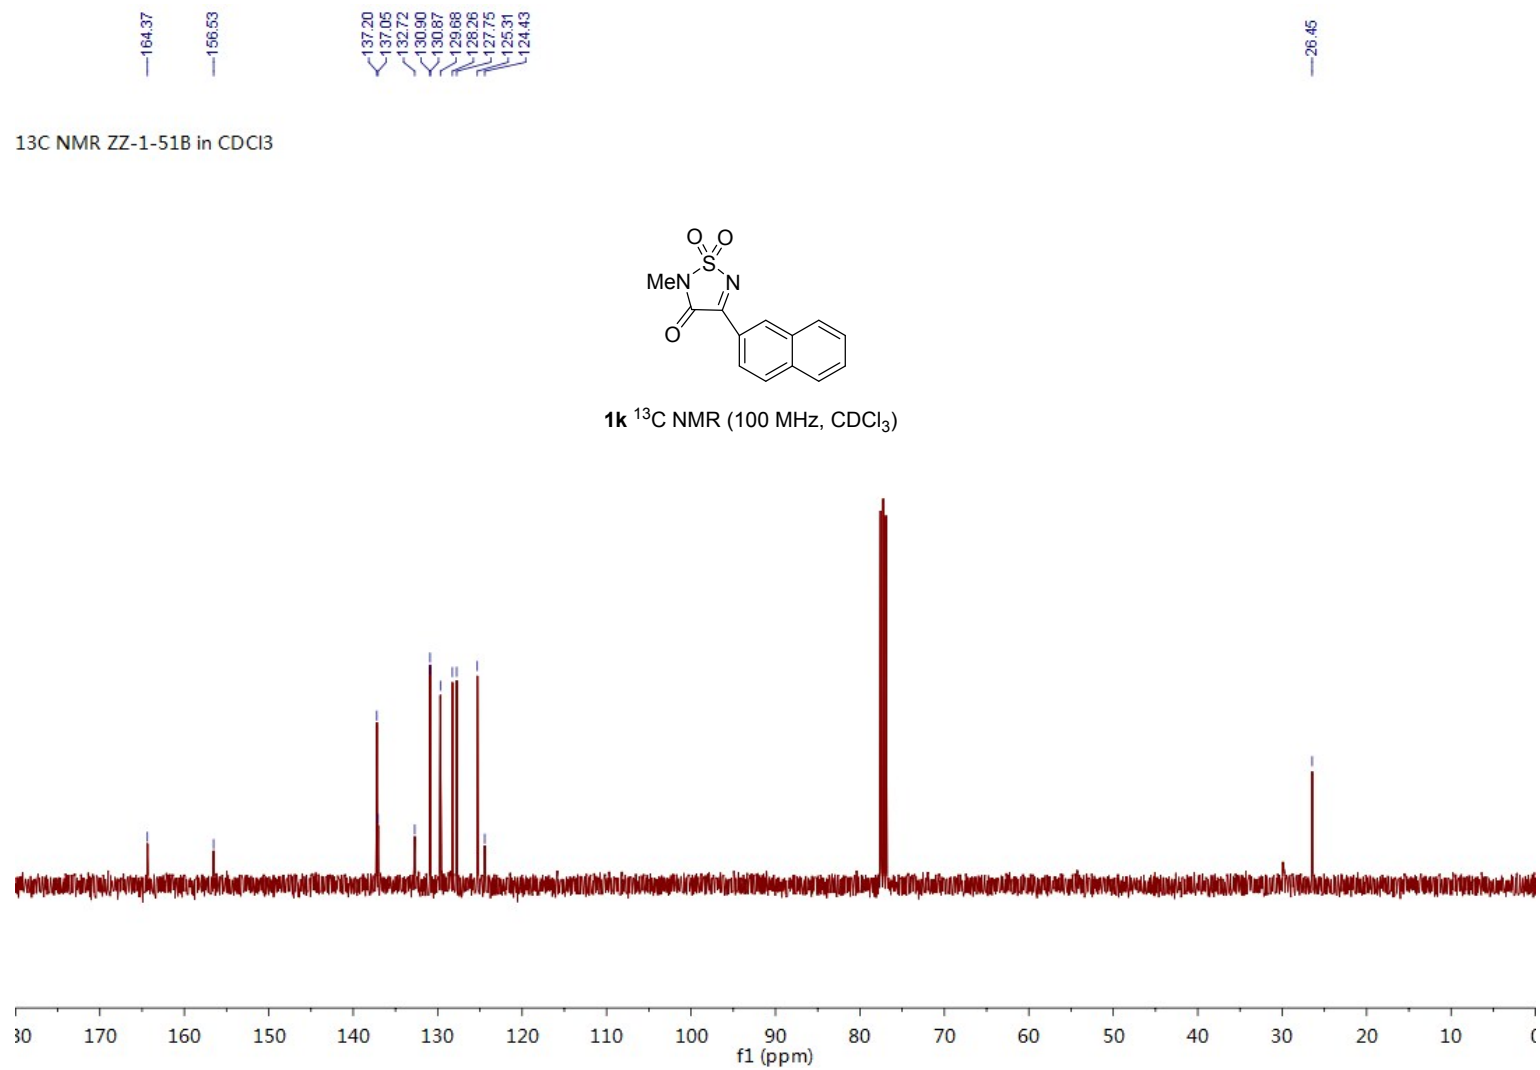

<sup>1</sup>H NMR ZZ-1-17 in CDCl<sub>3</sub>

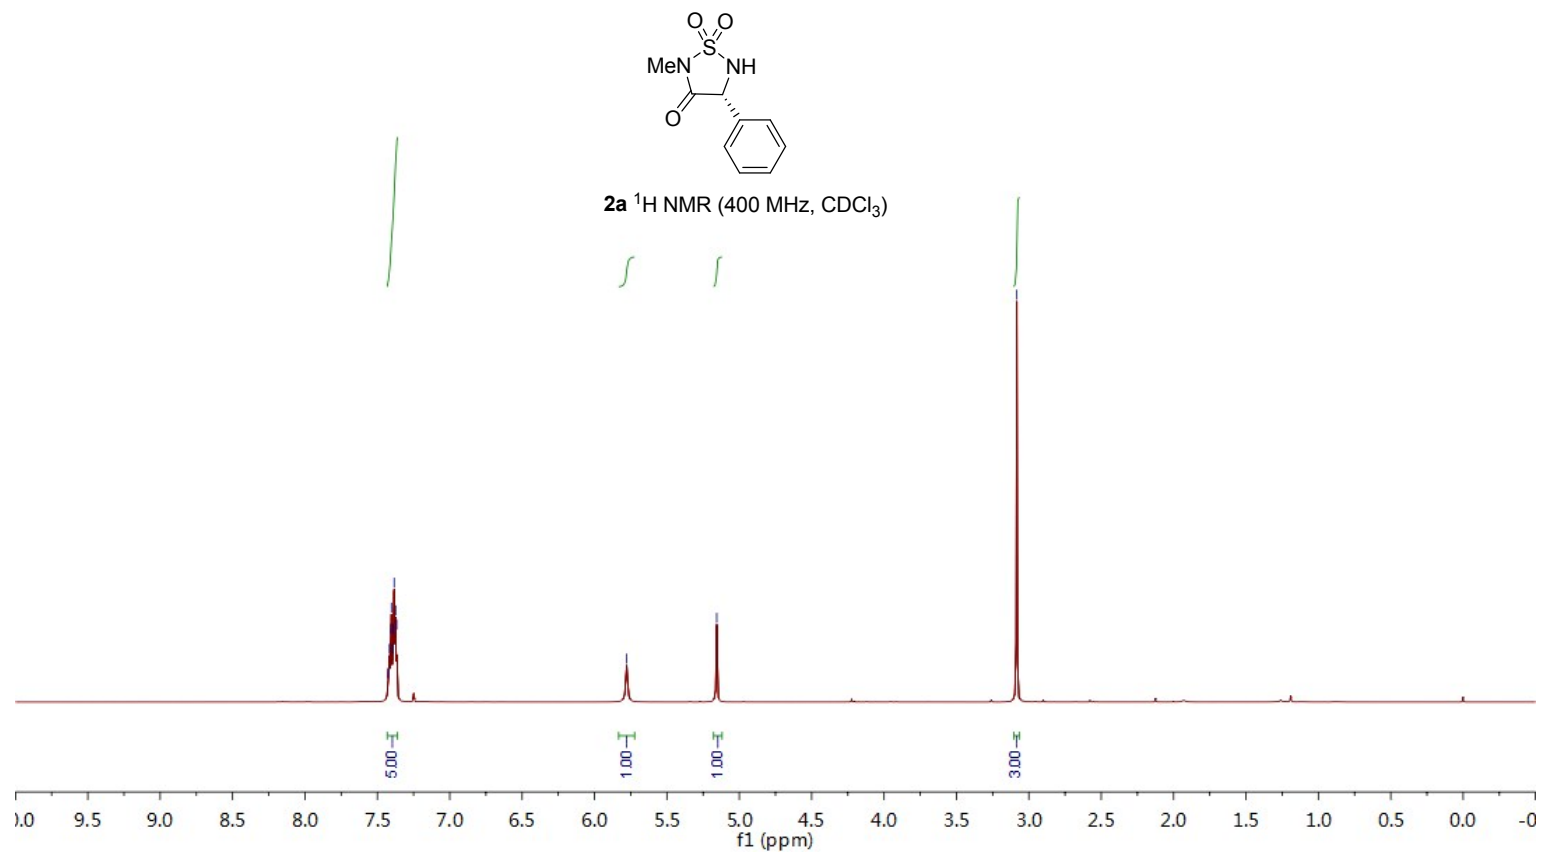

166.60

133.45  
129.63  
129.31  
127.28

64.07

25.78

<sup>13</sup>C NMR ZZ-1-17 in CDCl<sub>3</sub>

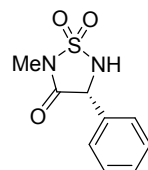

**2a** <sup>13</sup>C NMR (100 MHz, CDCl<sub>3</sub>)

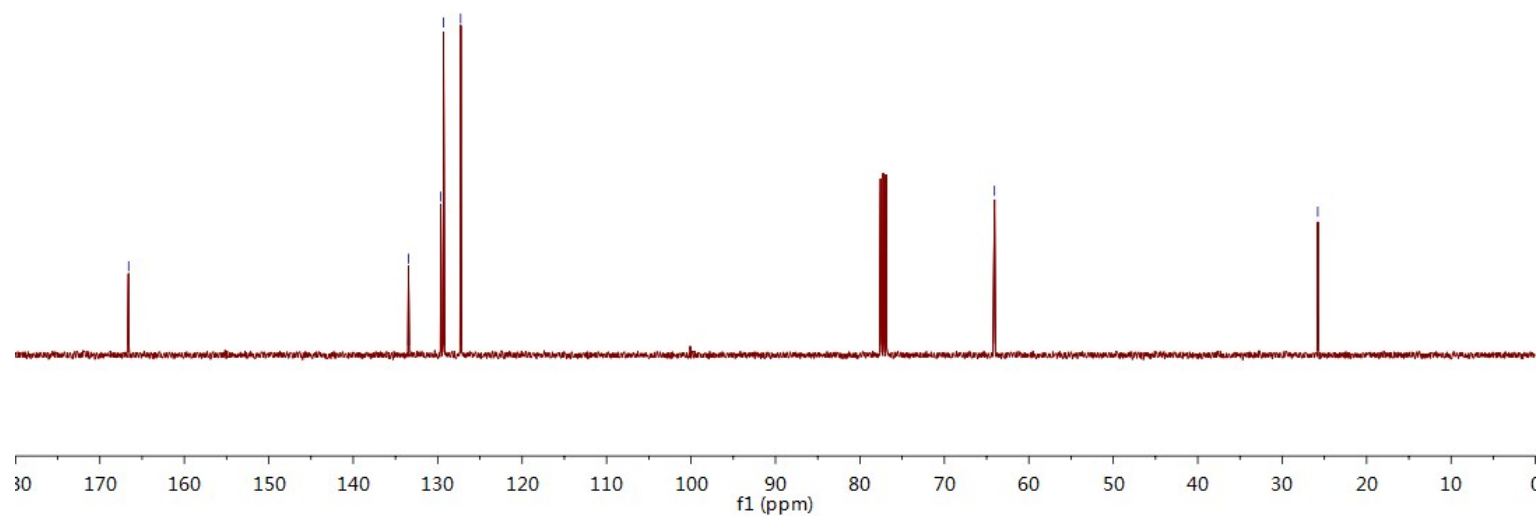

<sup>1</sup>H NMR ZZ-1-32 in CDCl<sub>3</sub>

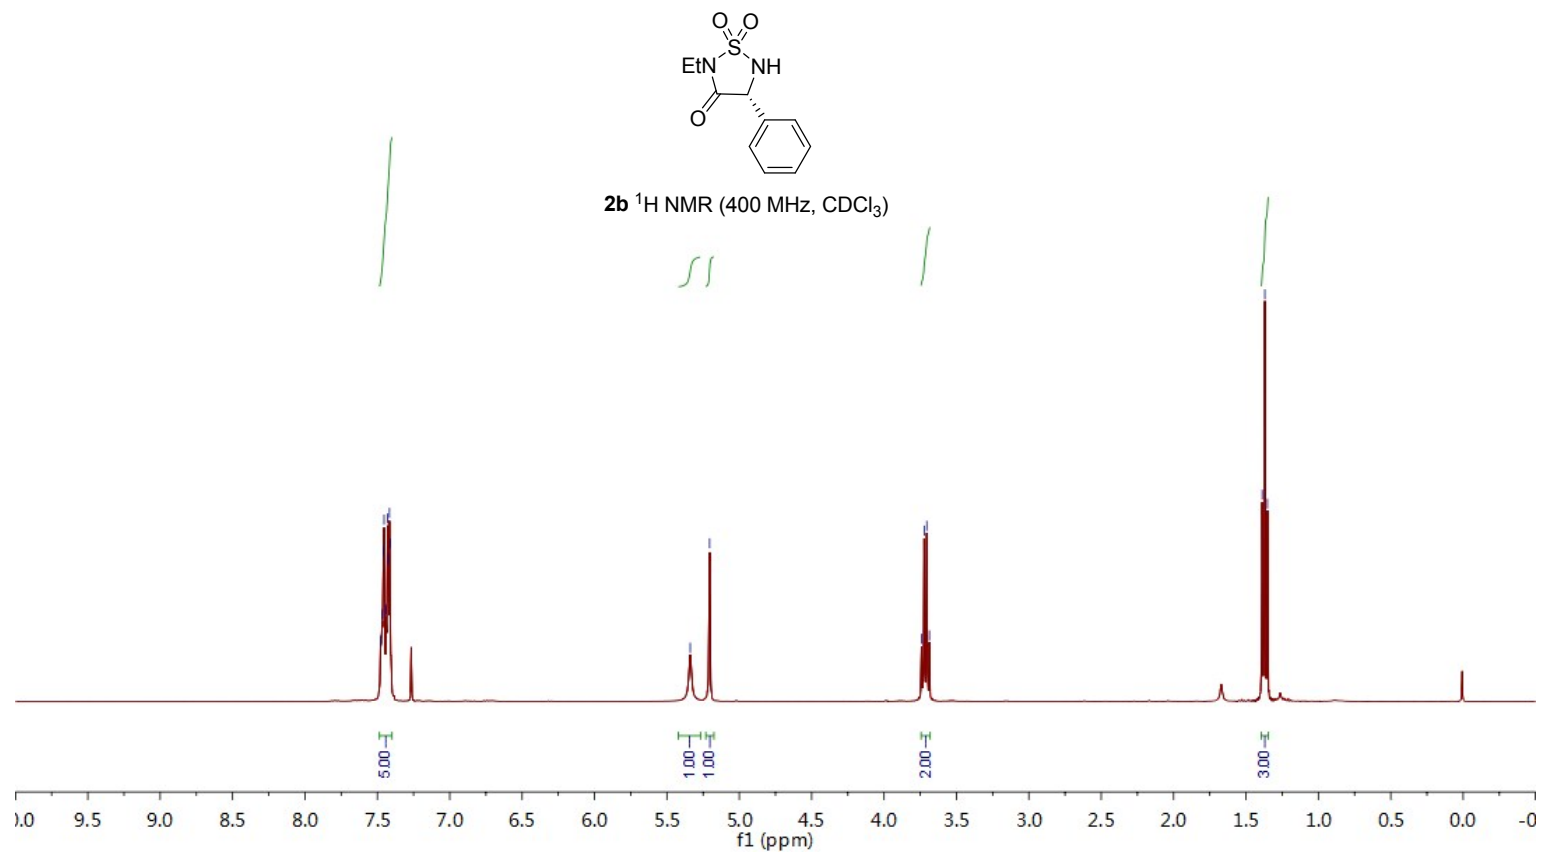



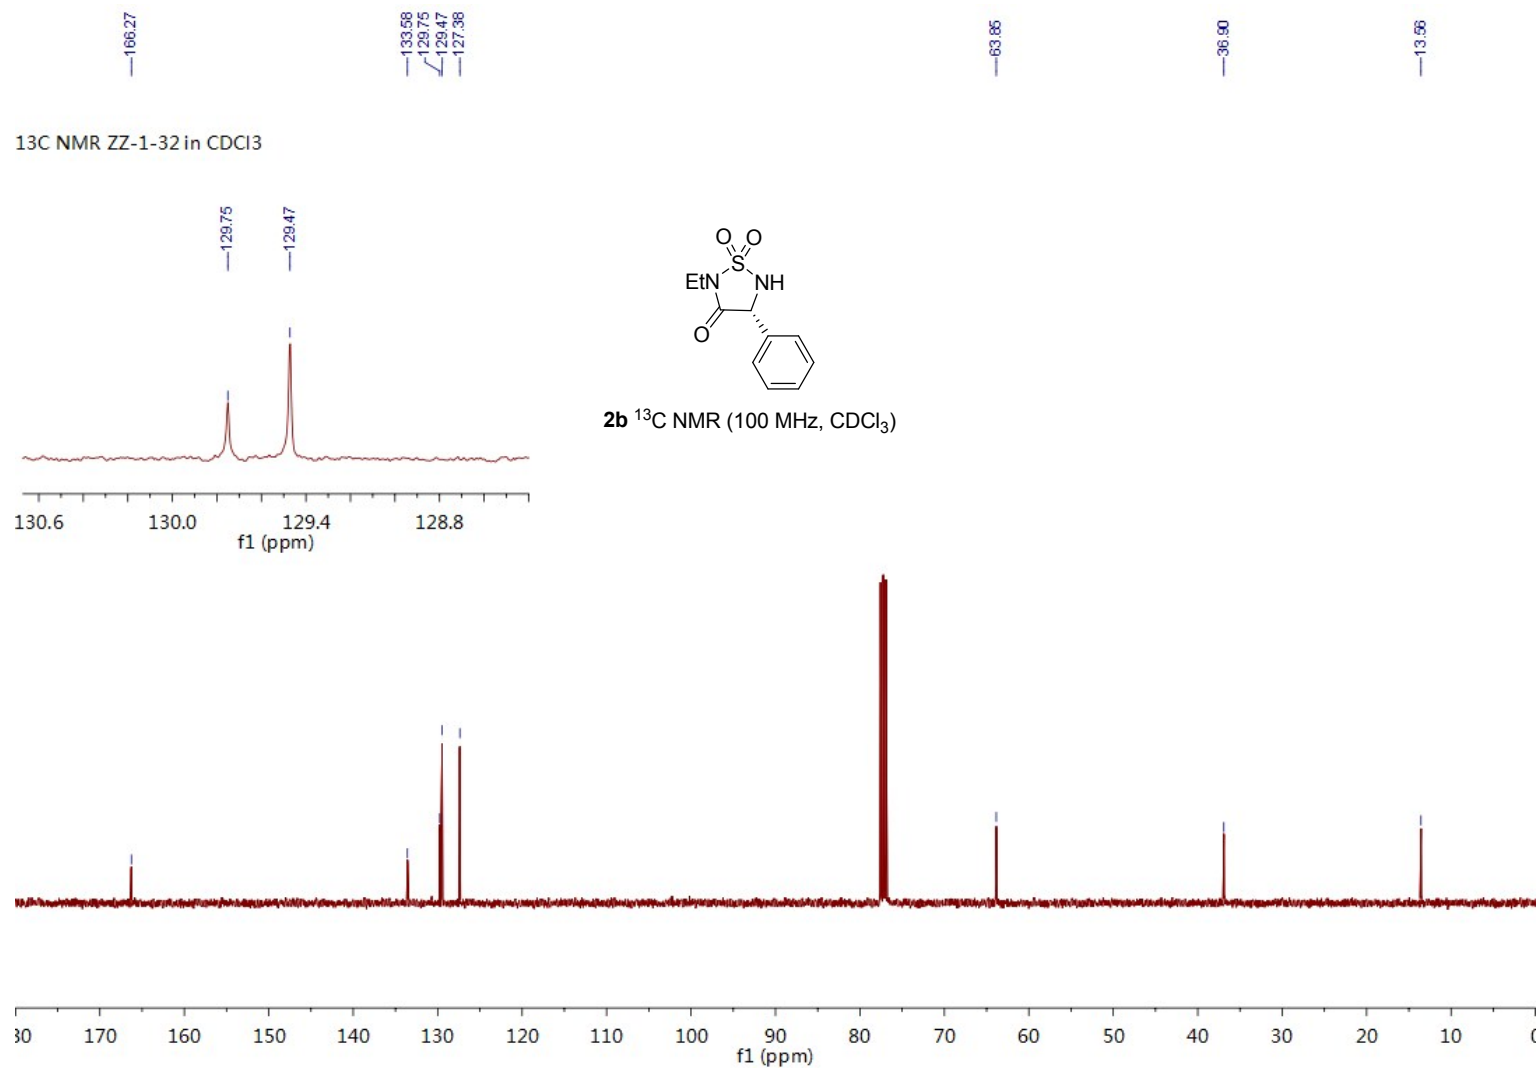

<sup>1</sup>H NMR ZZ-1-34 in CDCl<sub>3</sub>

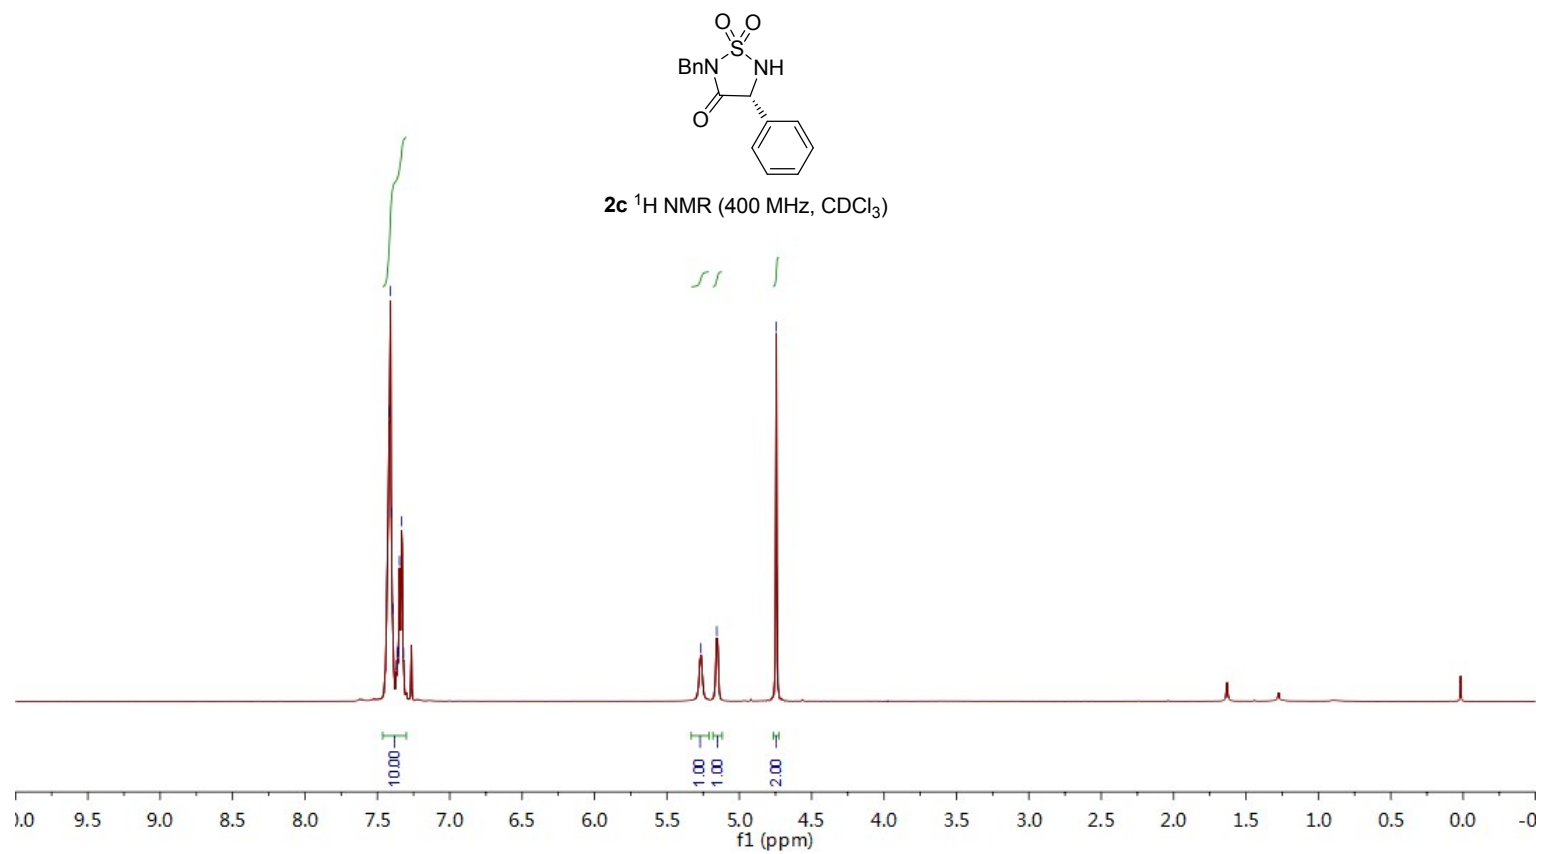

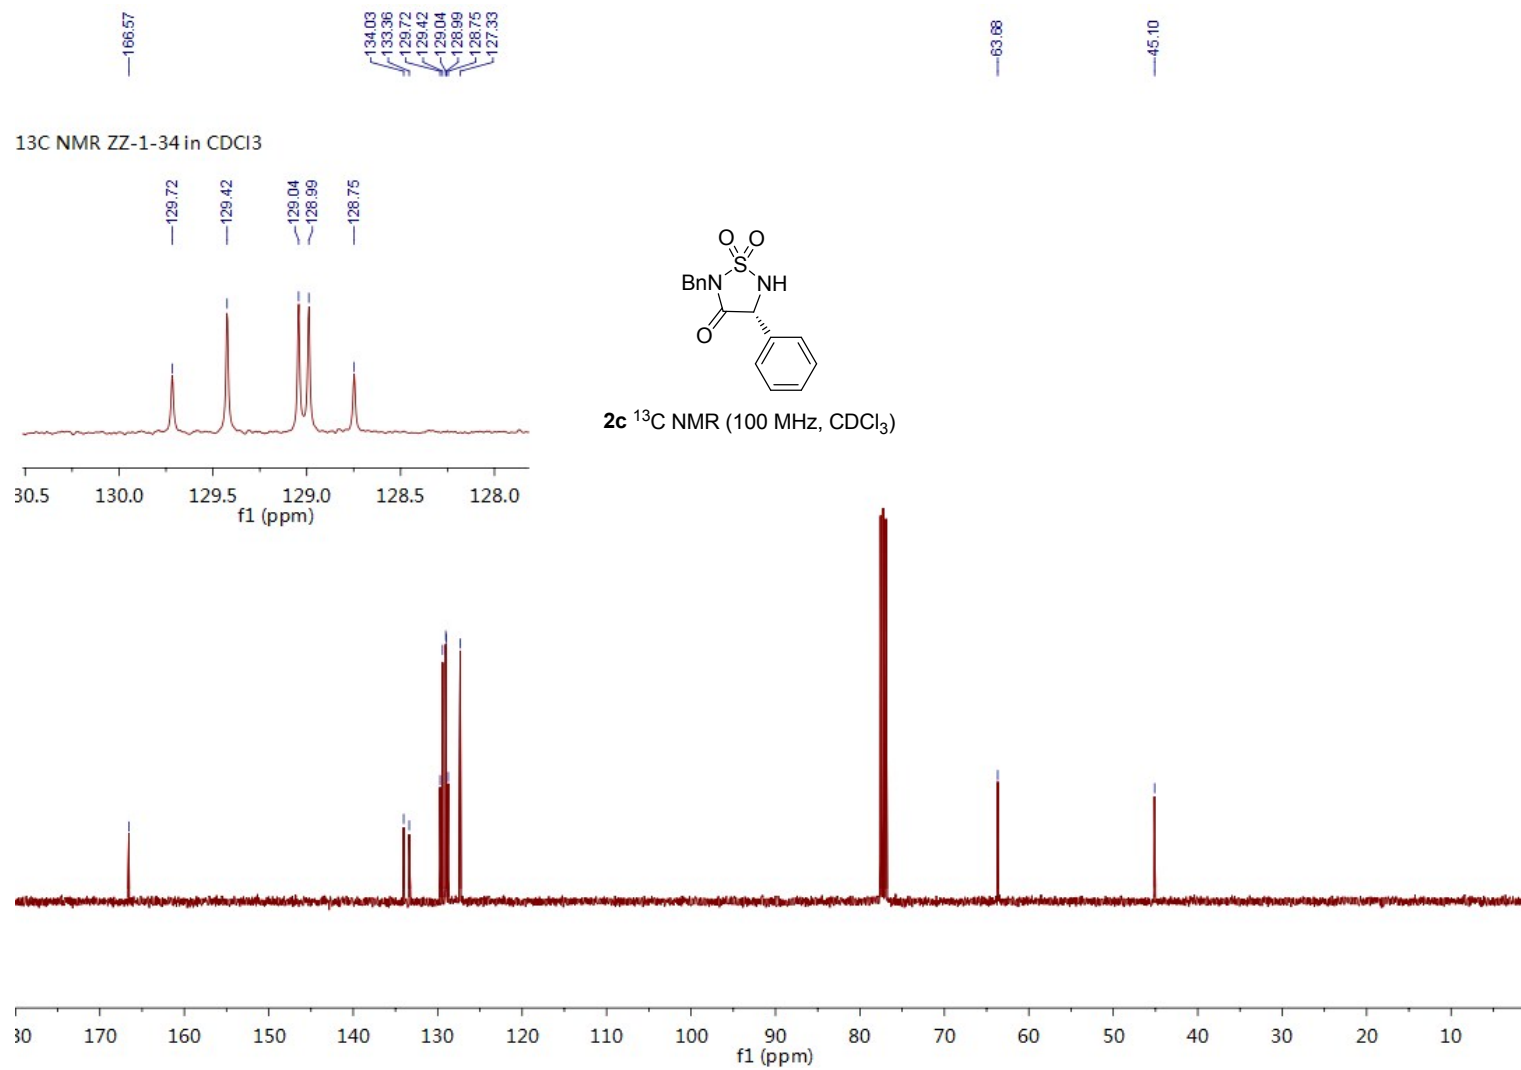

<sup>1</sup>H NMR ZZ-1-35 in CDCl<sub>3</sub>

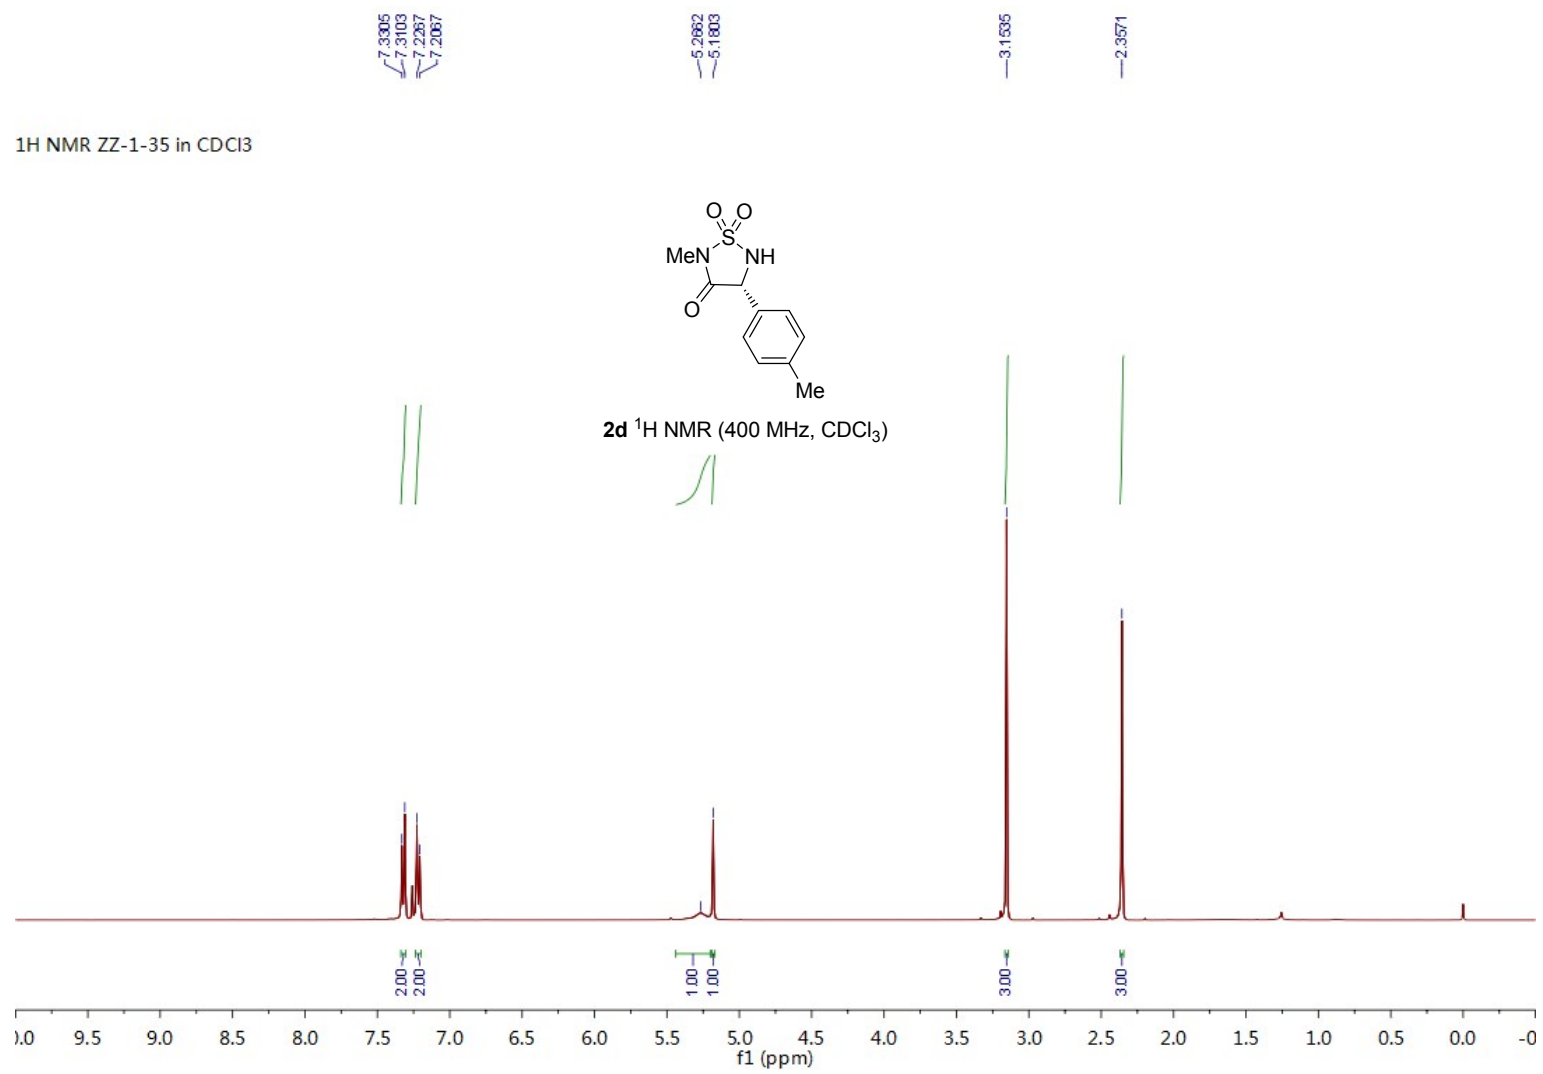

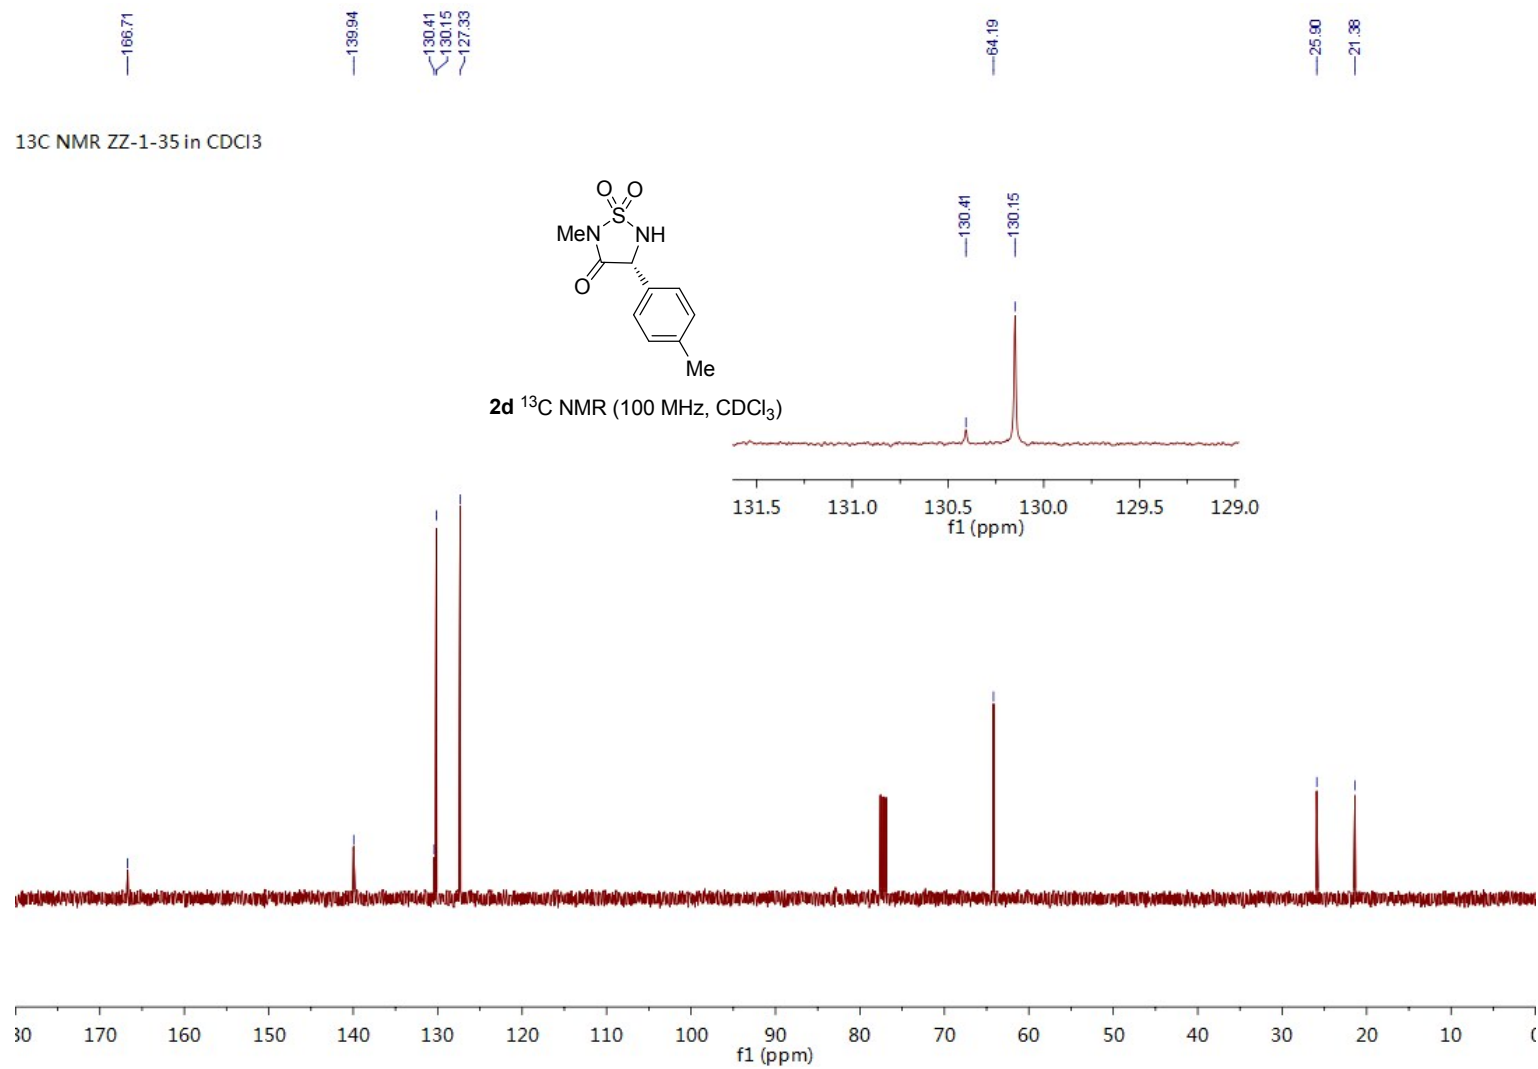

<sup>1</sup>H NMR ZZ-1-48 in CDCl<sub>3</sub>

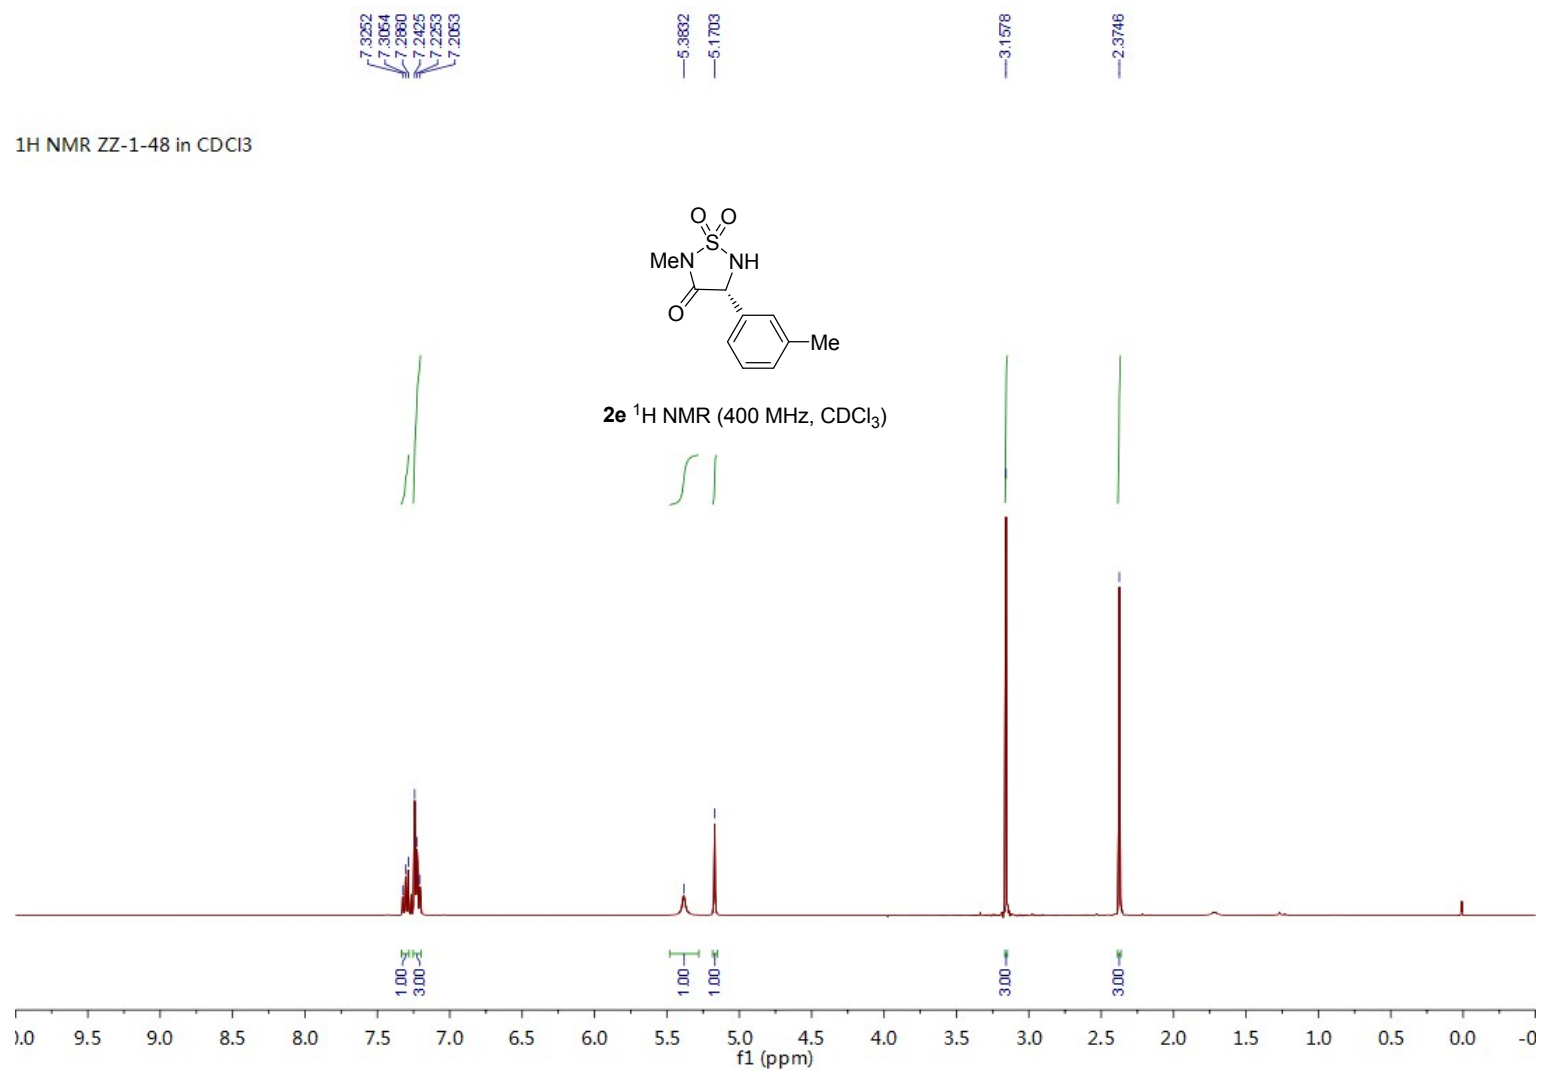

166.60

139.45

133.32

130.62

129.37

128.01

124.51

64.35

25.90

21.57

<sup>13</sup>C NMR ZZ-1-48 in CDCl<sub>3</sub>

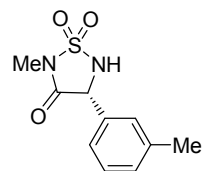

**2e** <sup>13</sup>C NMR (100 MHz, CDCl<sub>3</sub>)

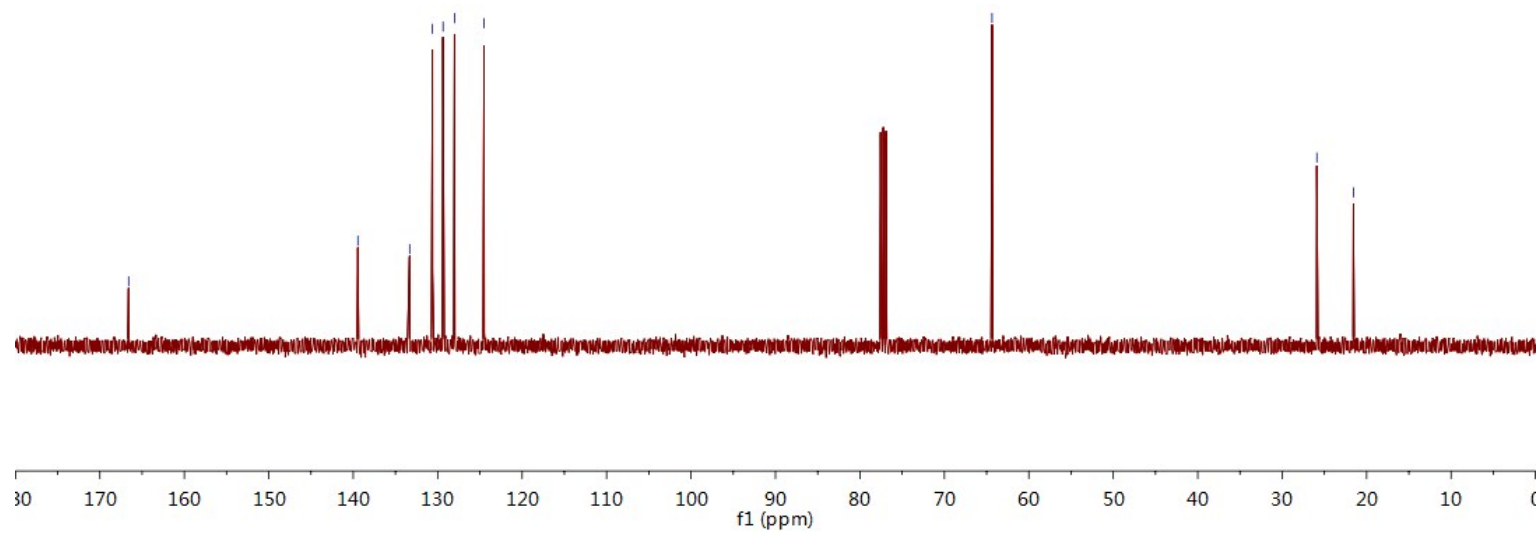

<sup>1</sup>H NMR ZZ-1-58 in CDCl<sub>3</sub>

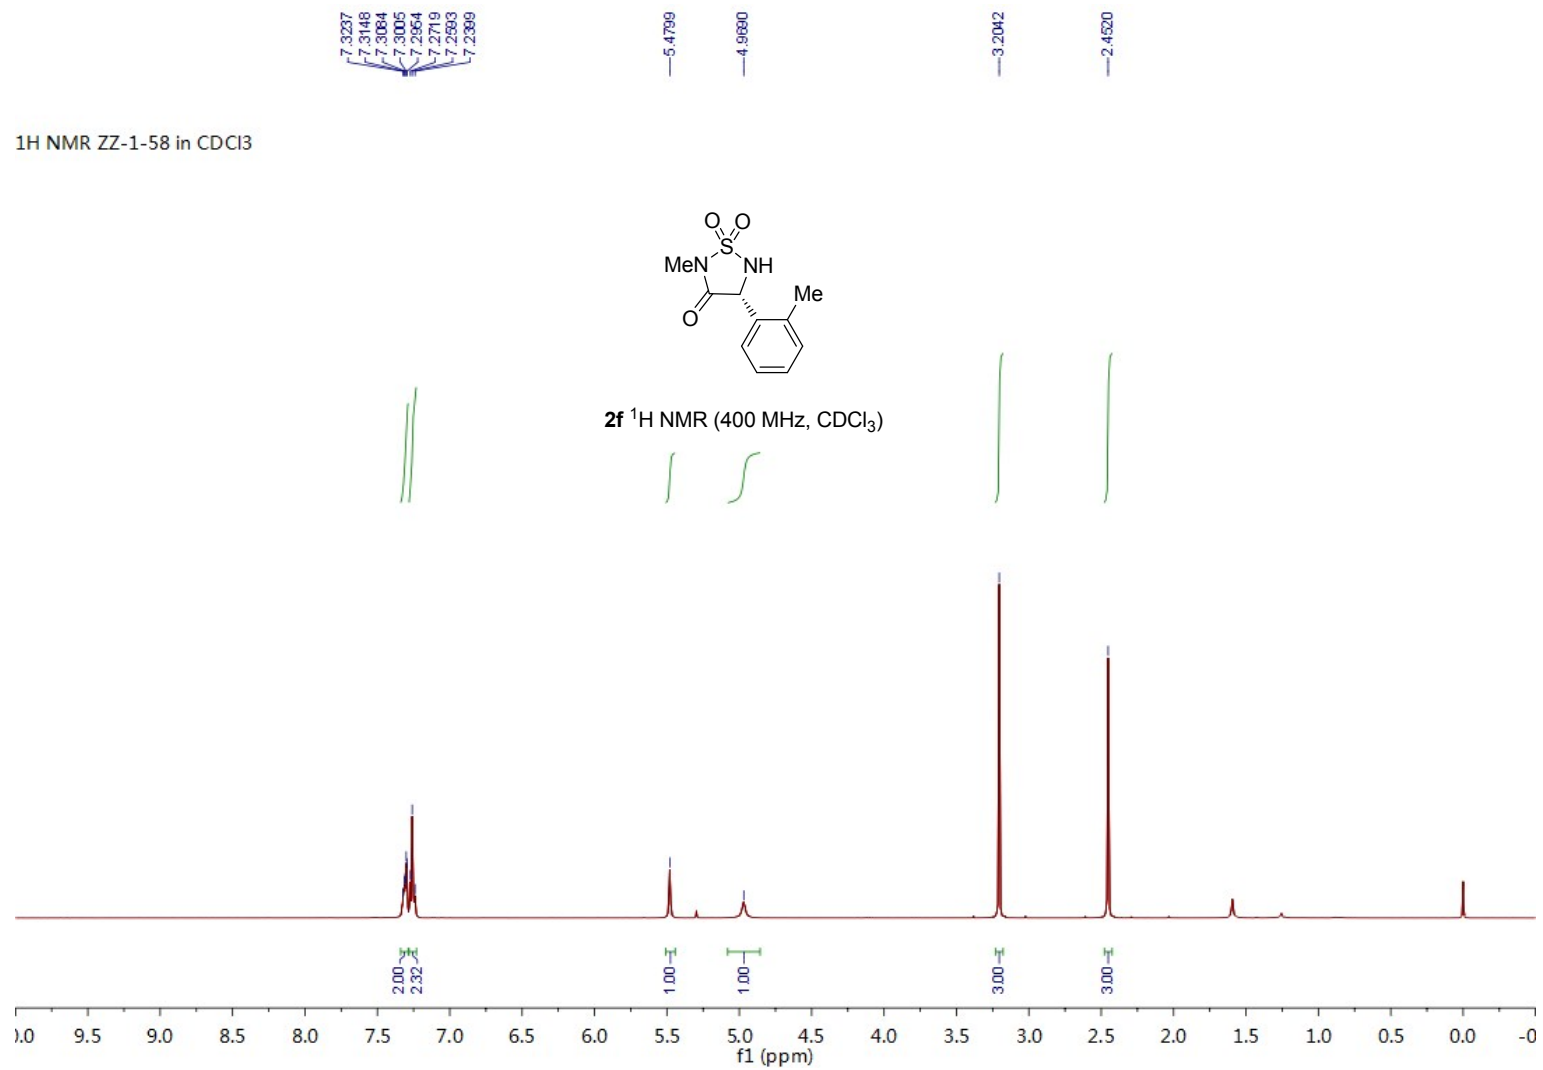



166.96  
137.54  
131.76  
131.59  
130.09  
127.88  
127.33

61.93

25.99

19.80

$^{13}\text{C}$  NMR ZZ-1-58 in  $\text{CDCl}_3$

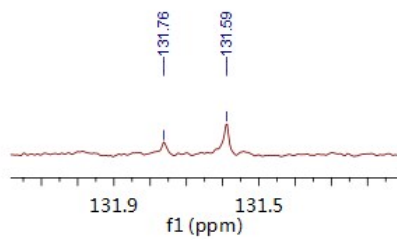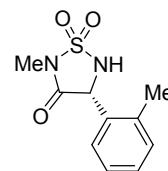

**2f**  $^{13}\text{C}$  NMR (100 MHz,  $\text{CDCl}_3$ )

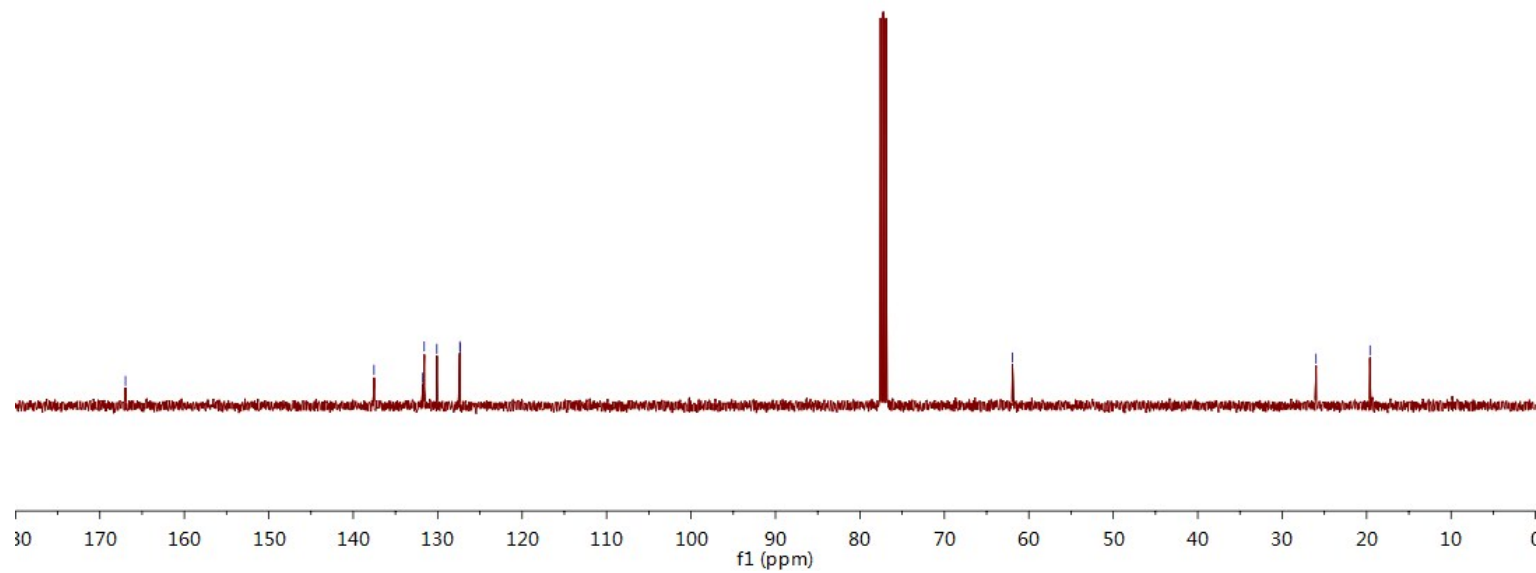

<sup>1</sup>H NMR ZZ-1-41 in CDCl<sub>3</sub>

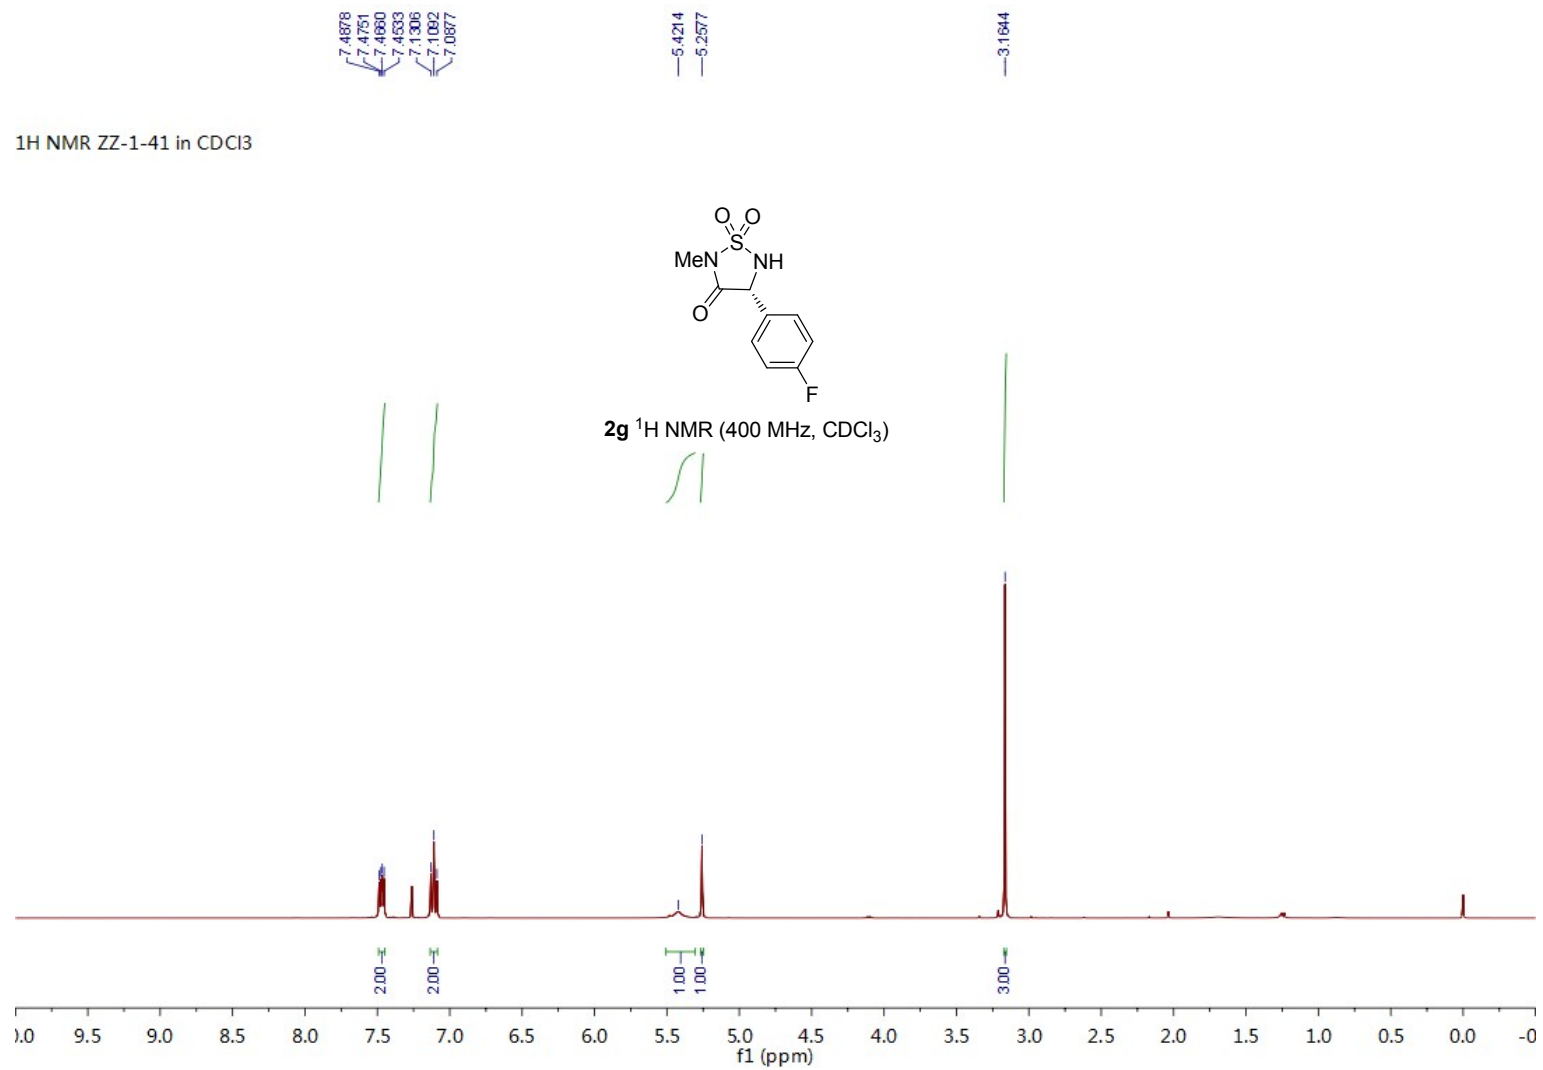

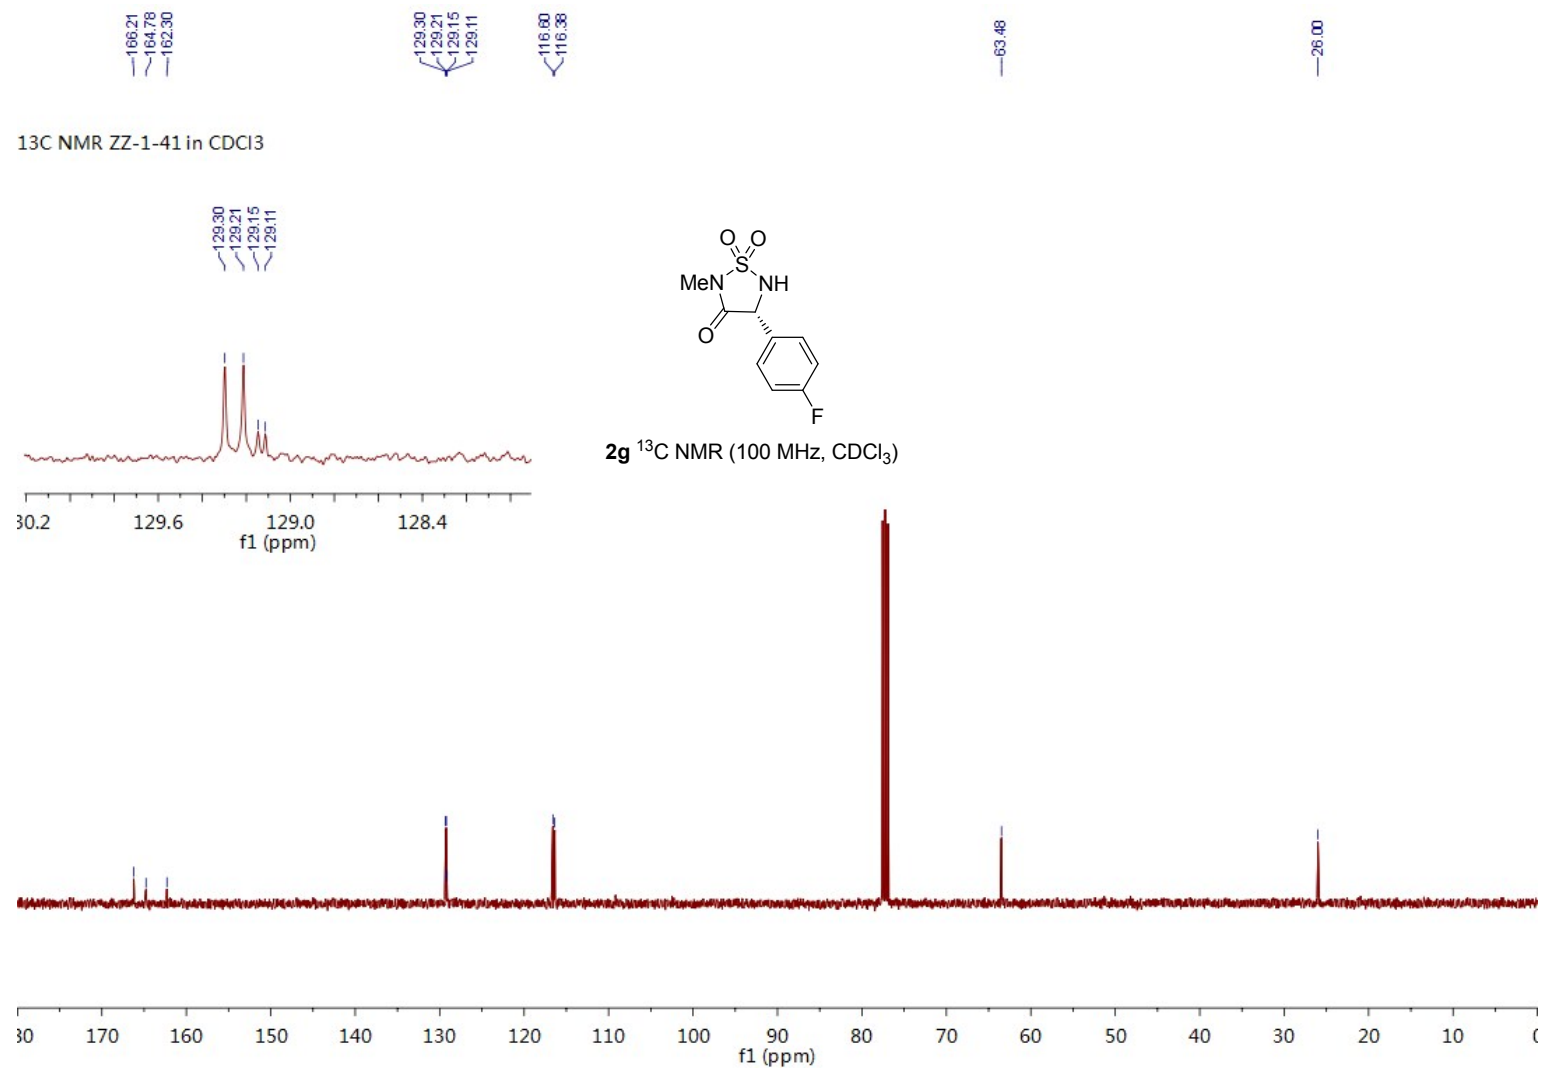

<sup>19</sup>F NMR ZZ-1-41 in CDCl<sub>3</sub>

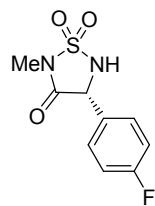

**2g** <sup>19</sup>F NMR (376 MHz, CDCl<sub>3</sub>)

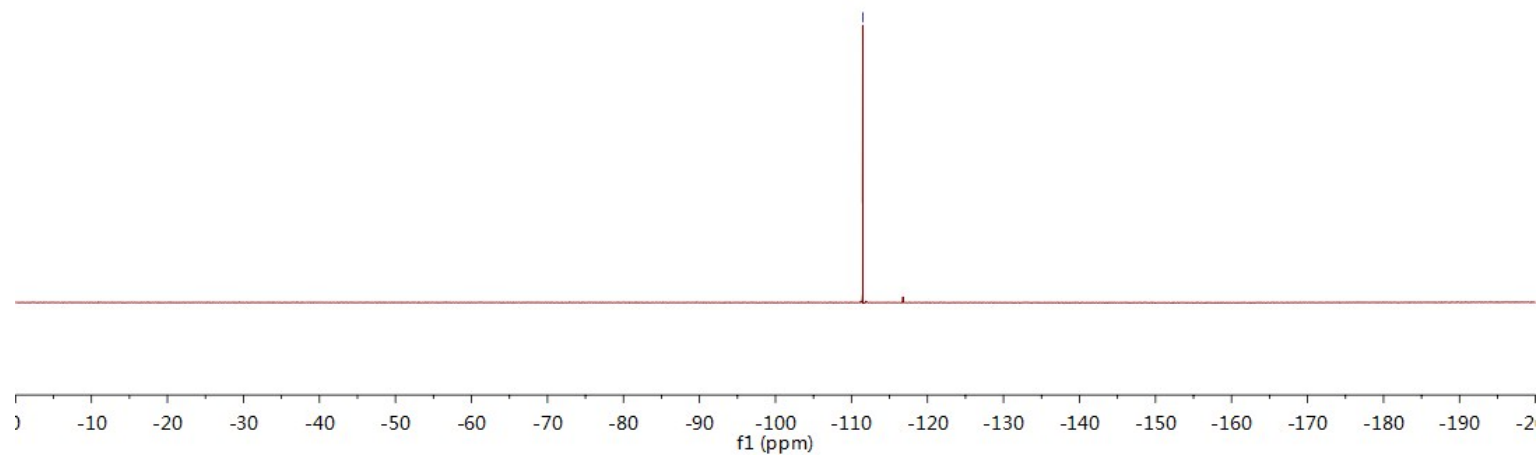

<sup>1</sup>H NMR ZZ-1-27 in CDCl<sub>3</sub>

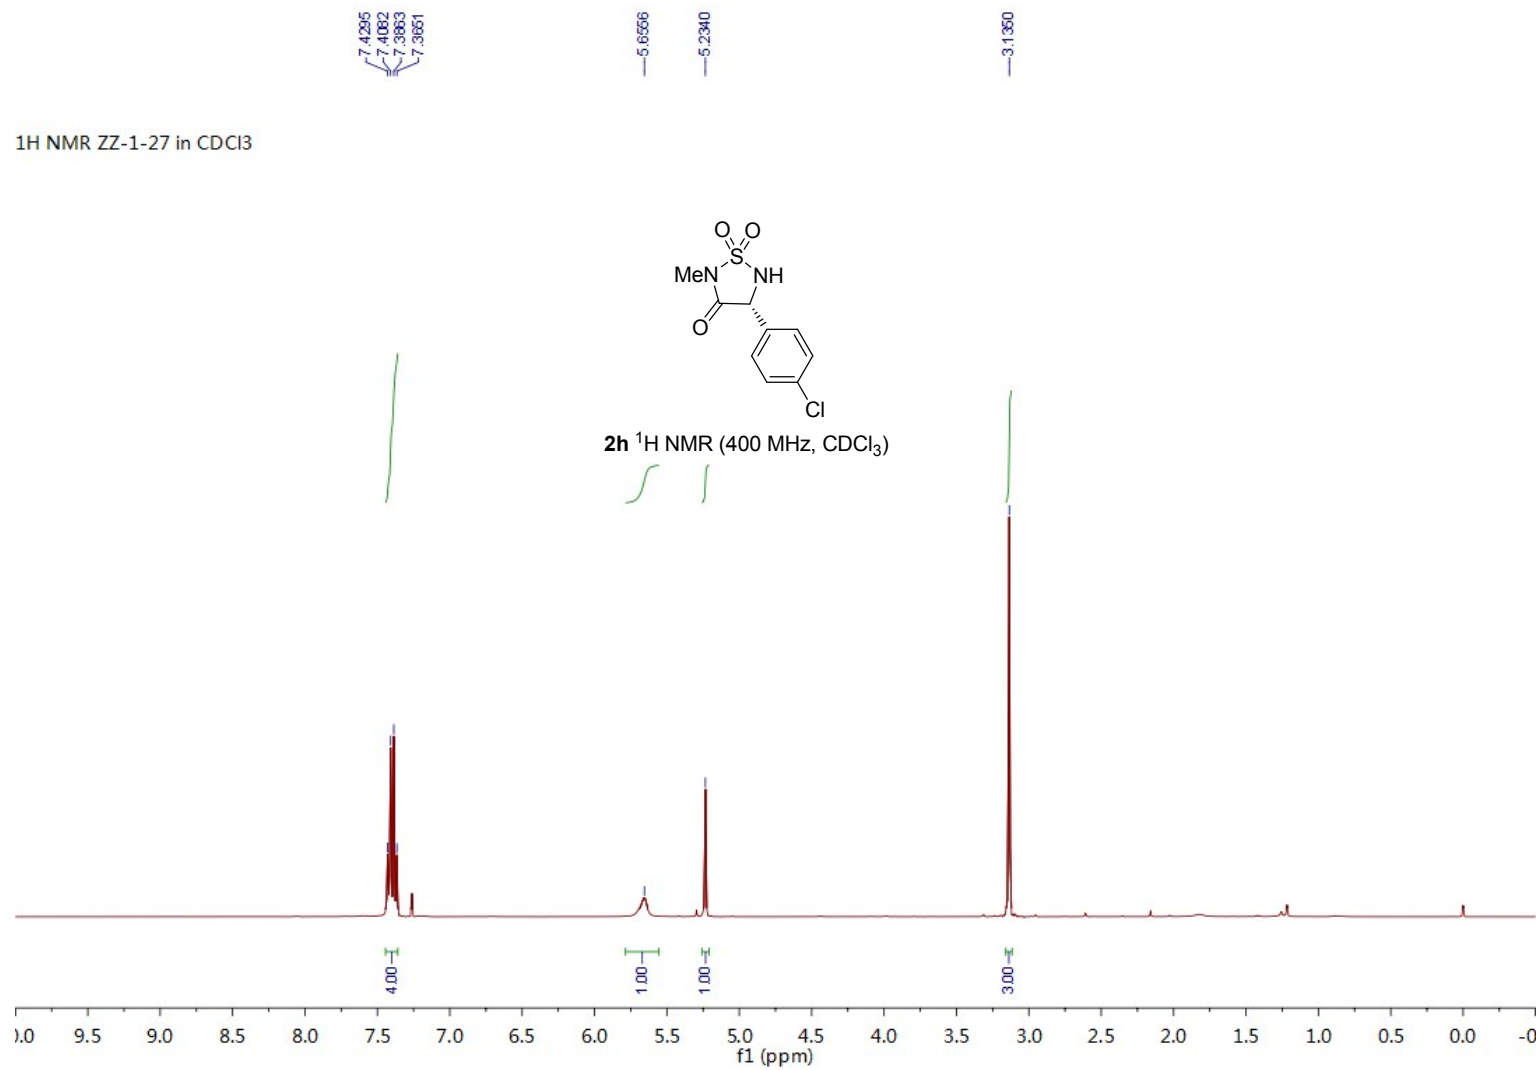

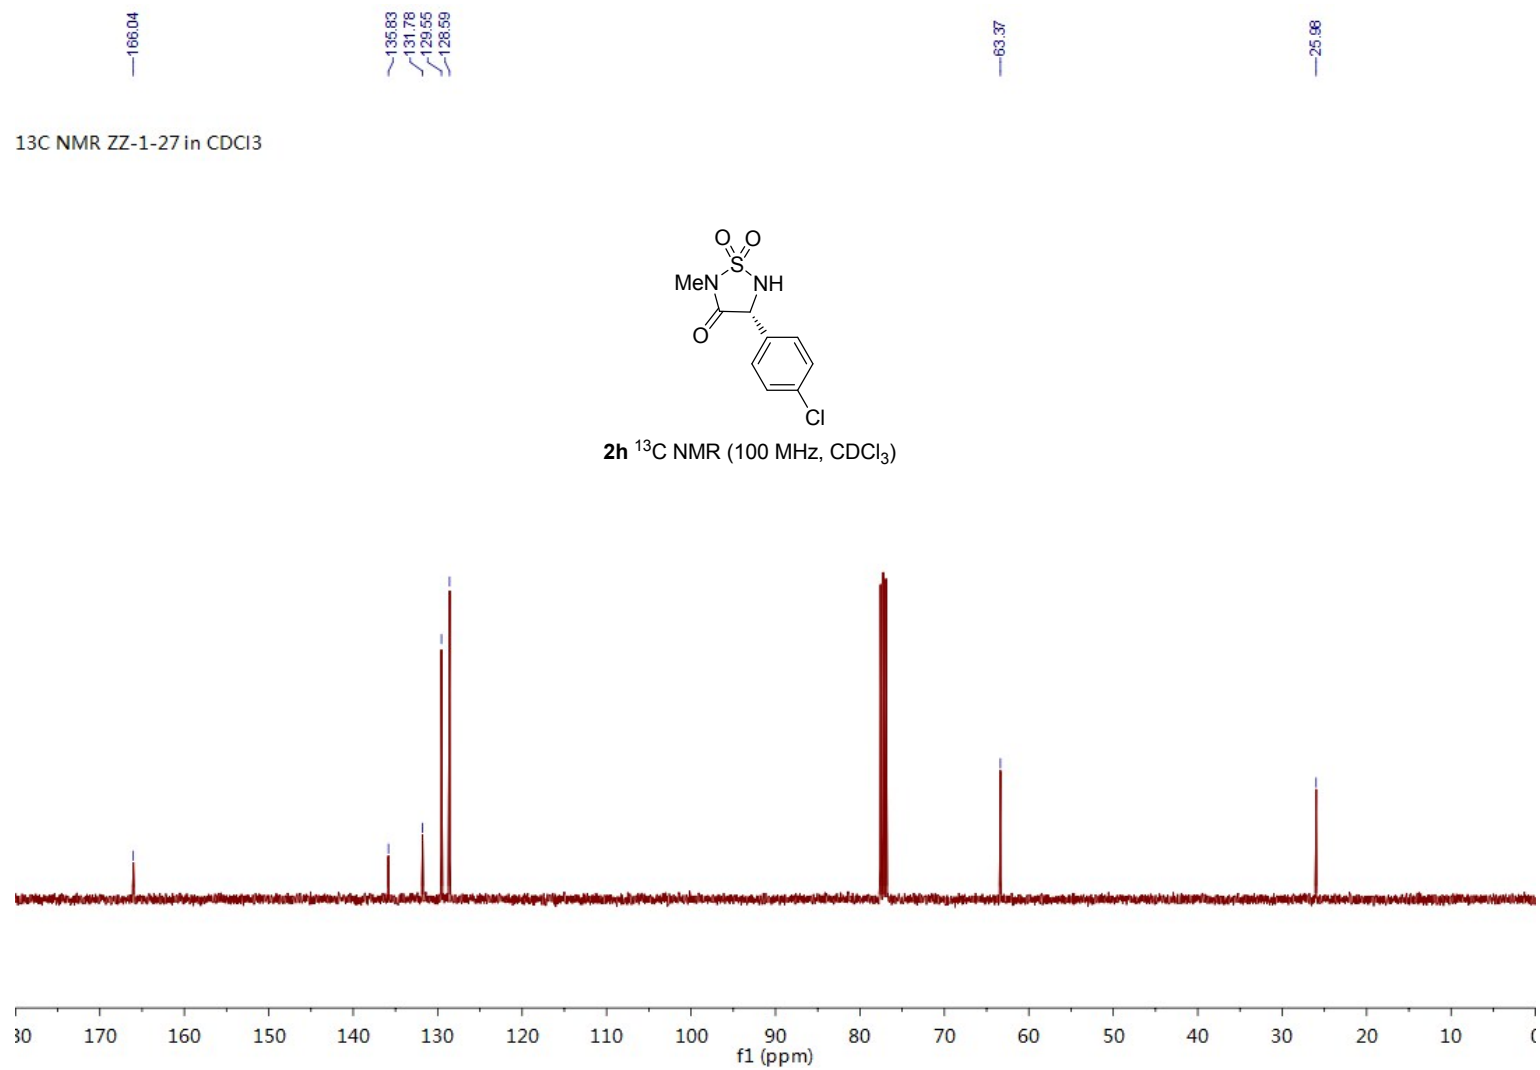

<sup>1</sup>H NMR ZZ-1-39 in CDCl<sub>3</sub>

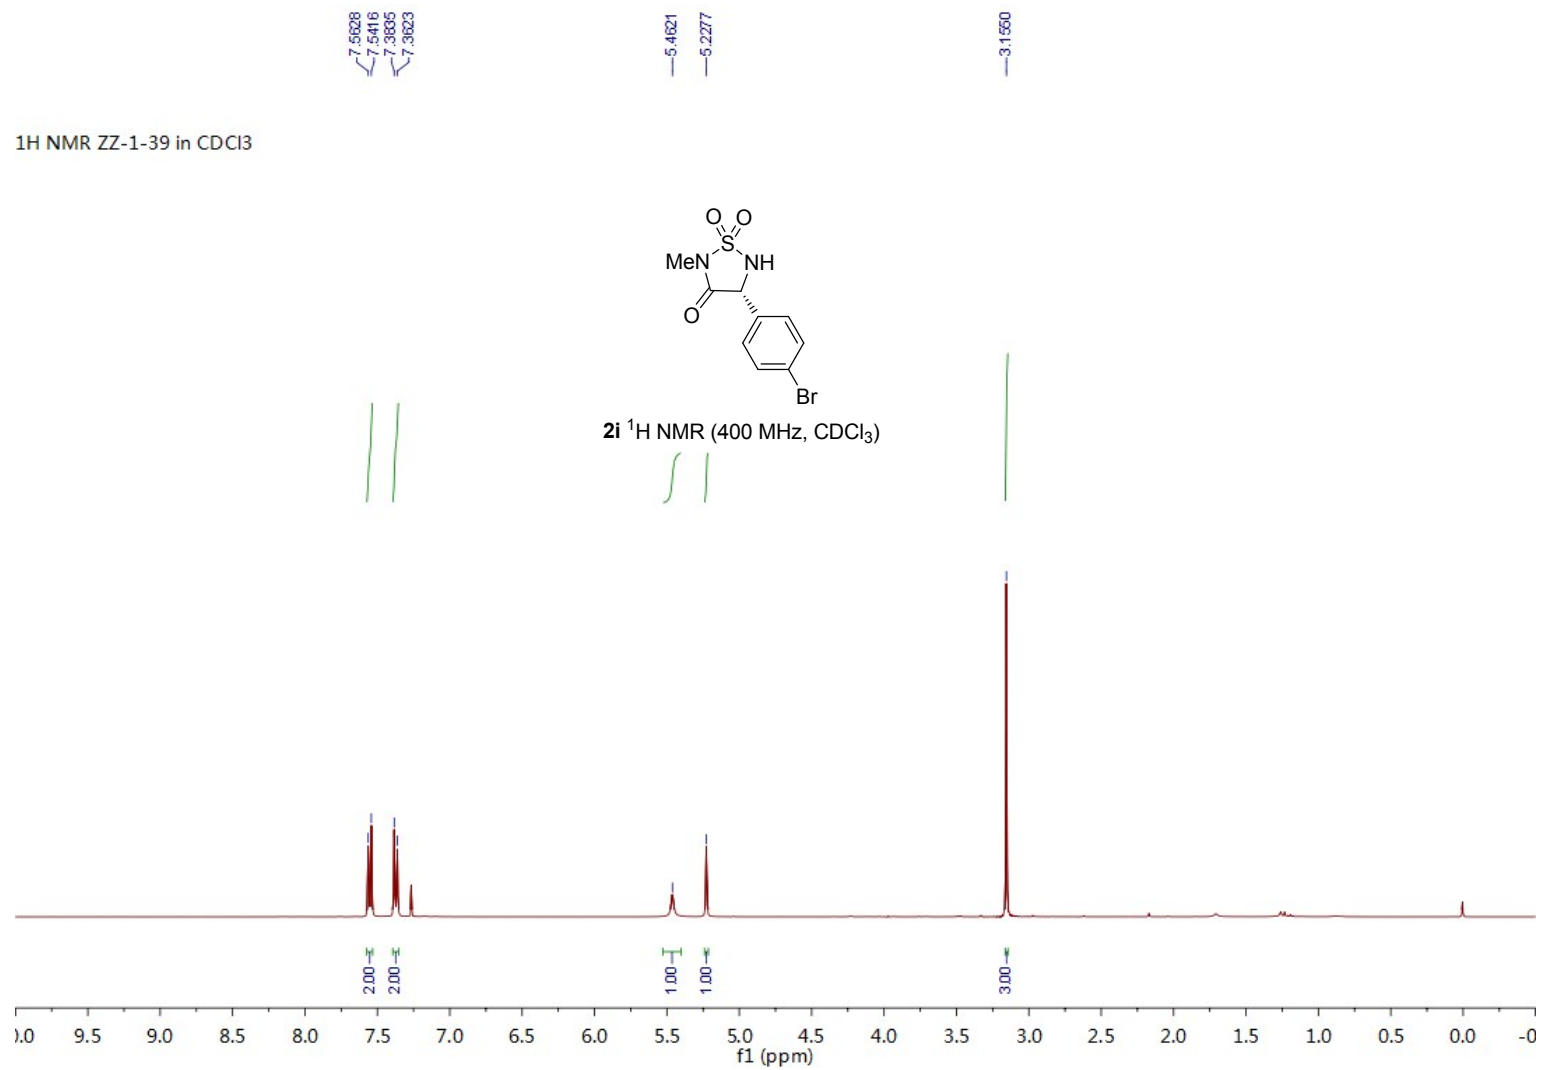

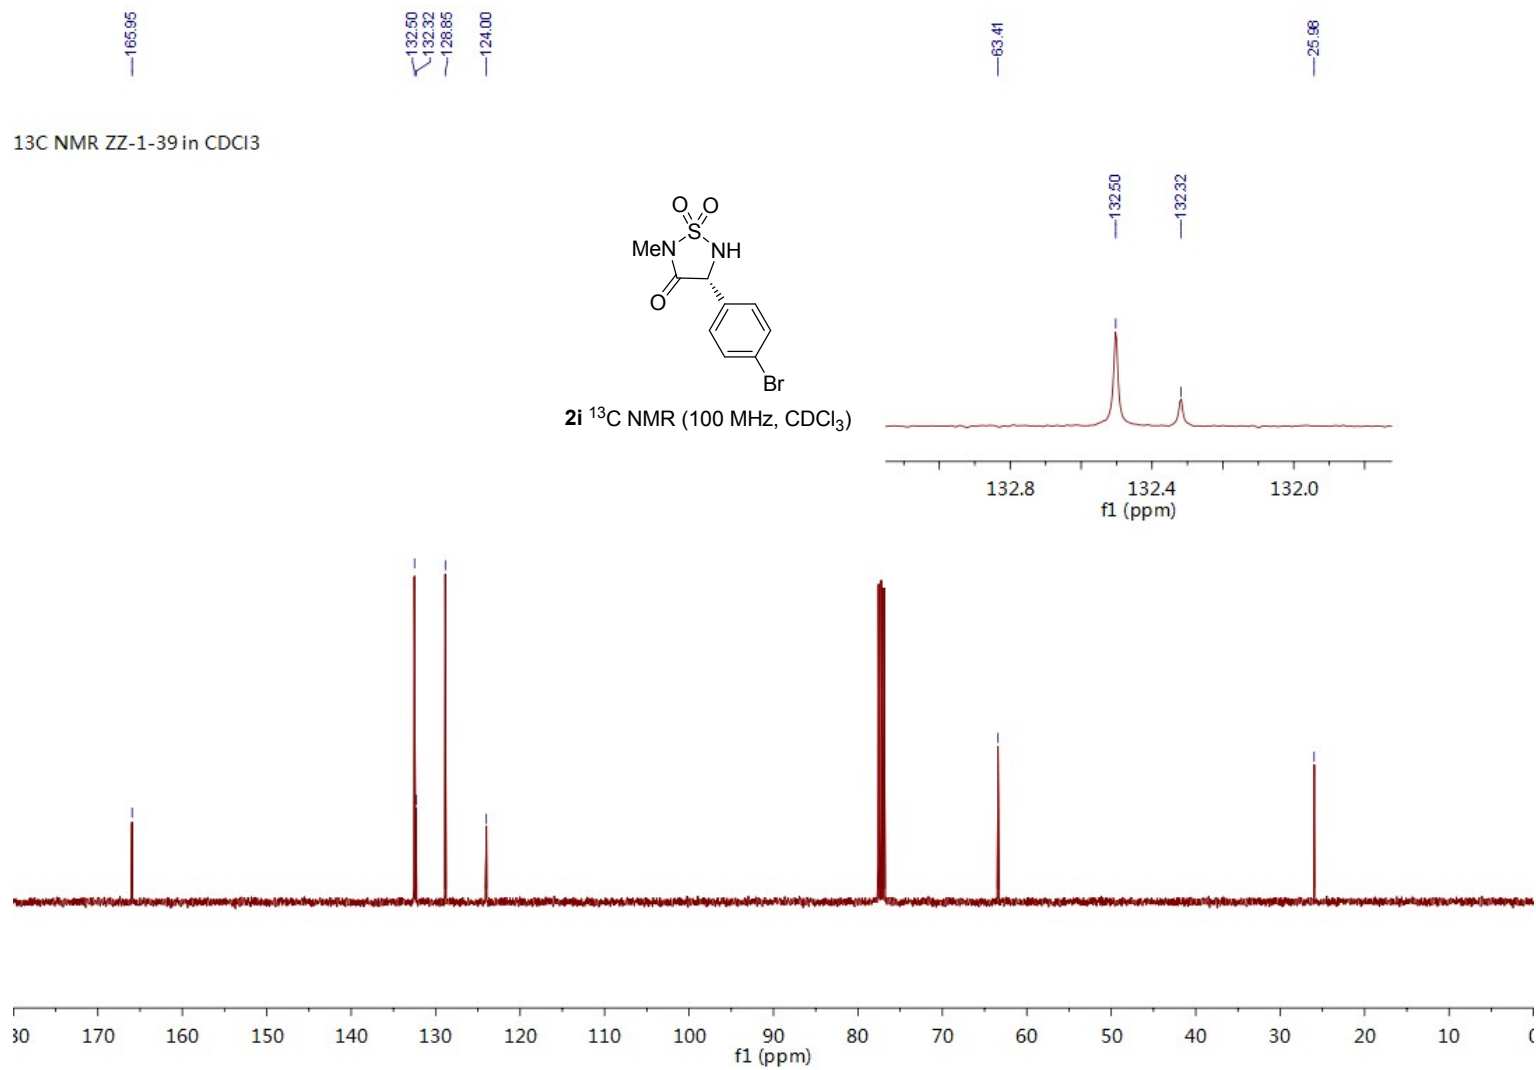



<sup>1</sup>H NMR ZZ-1-36 in CDCl<sub>3</sub>

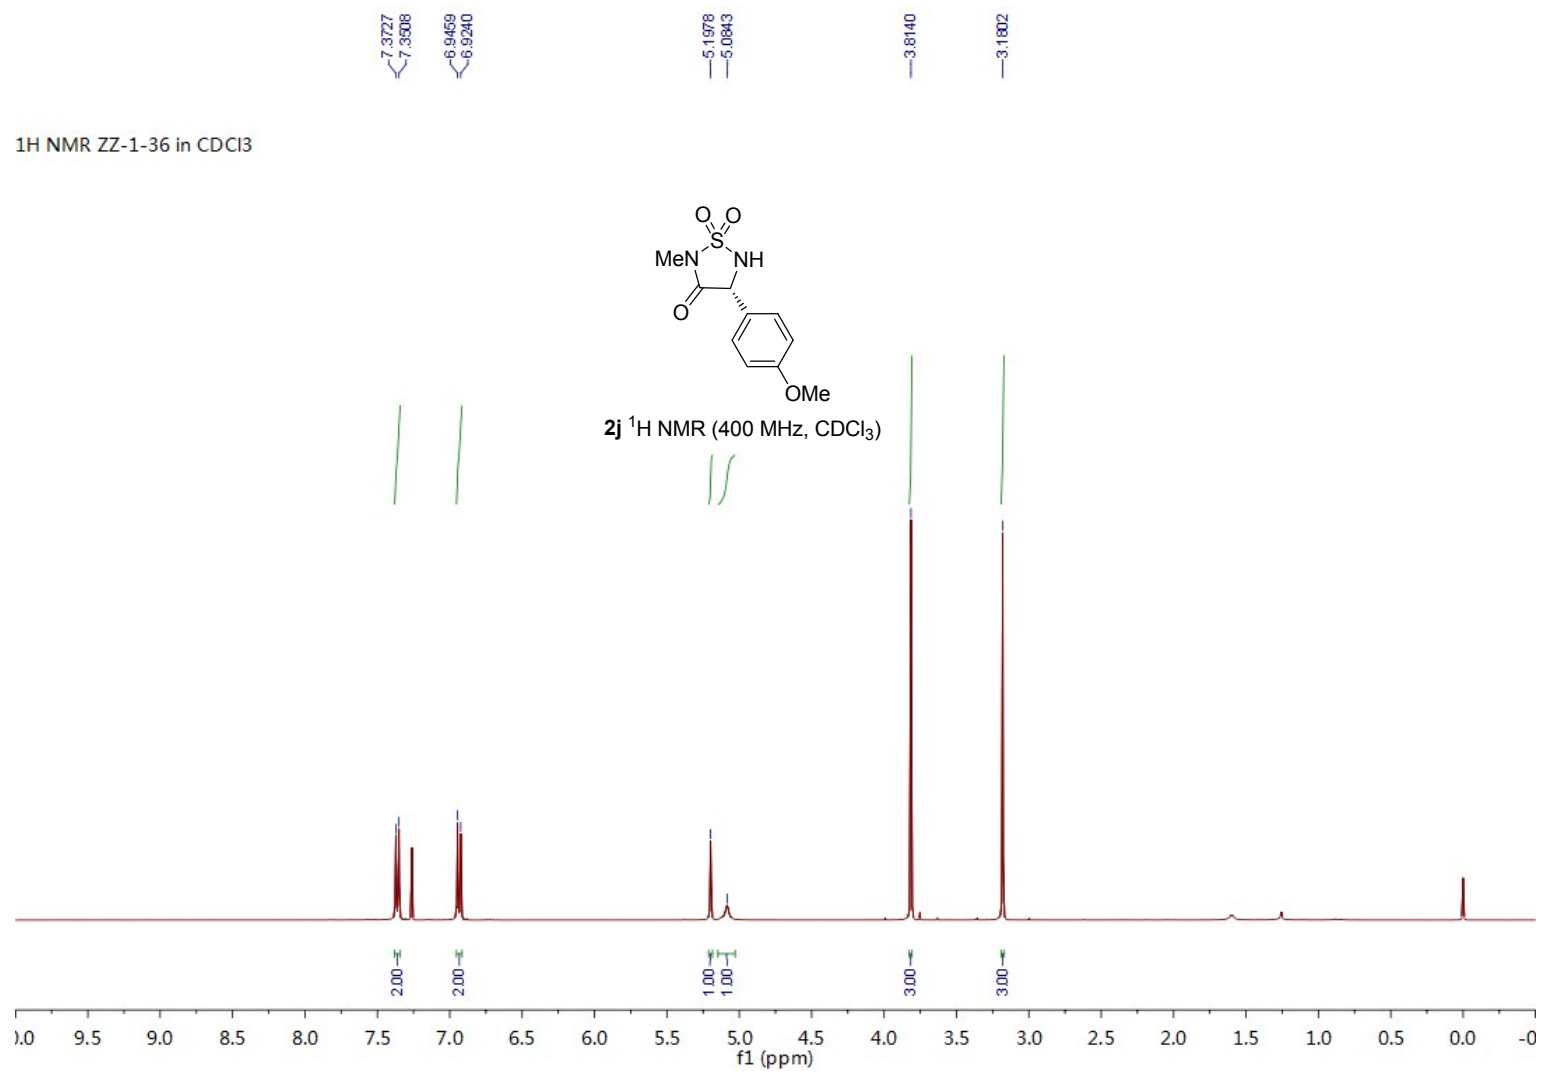

166.86  
160.75

128.86  
125.31

114.80

64.00

55.80

25.91

<sup>13</sup>C NMR ZZ-1-36 in CDCl<sub>3</sub>

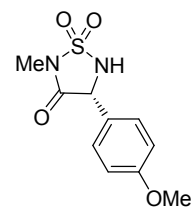

**2j** <sup>13</sup>C NMR (100 MHz, CDCl<sub>3</sub>)

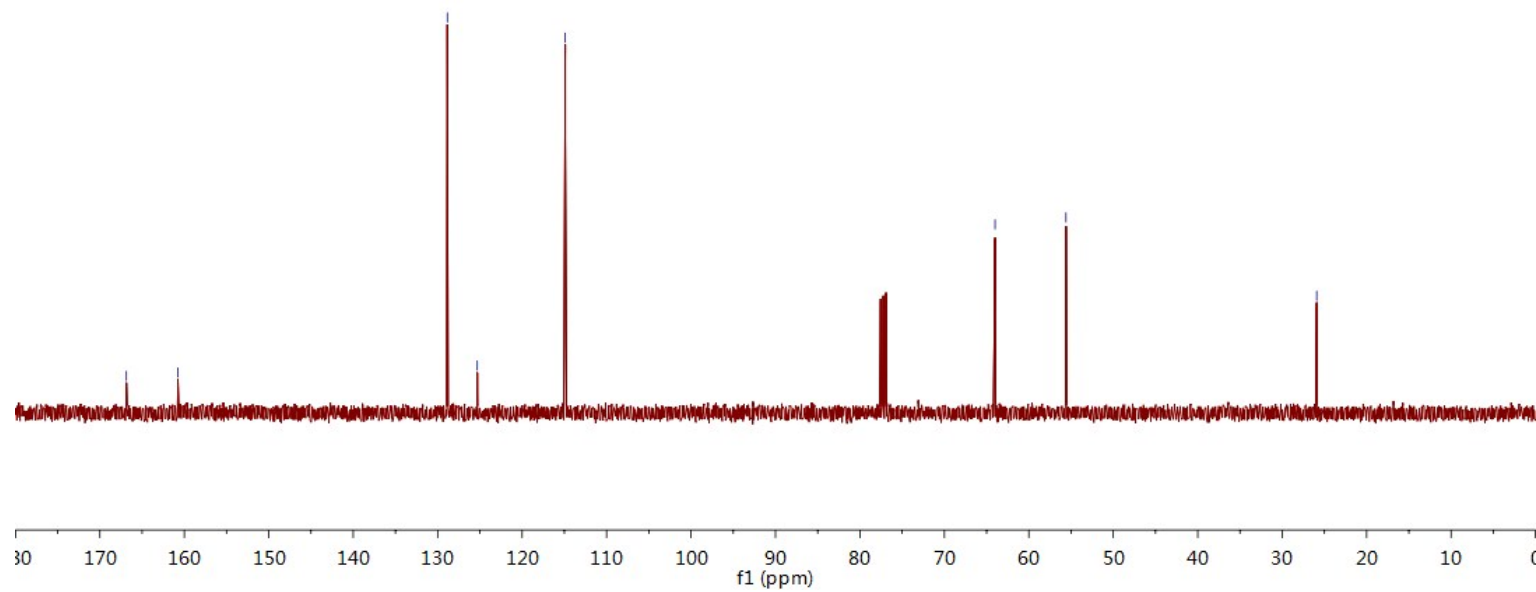

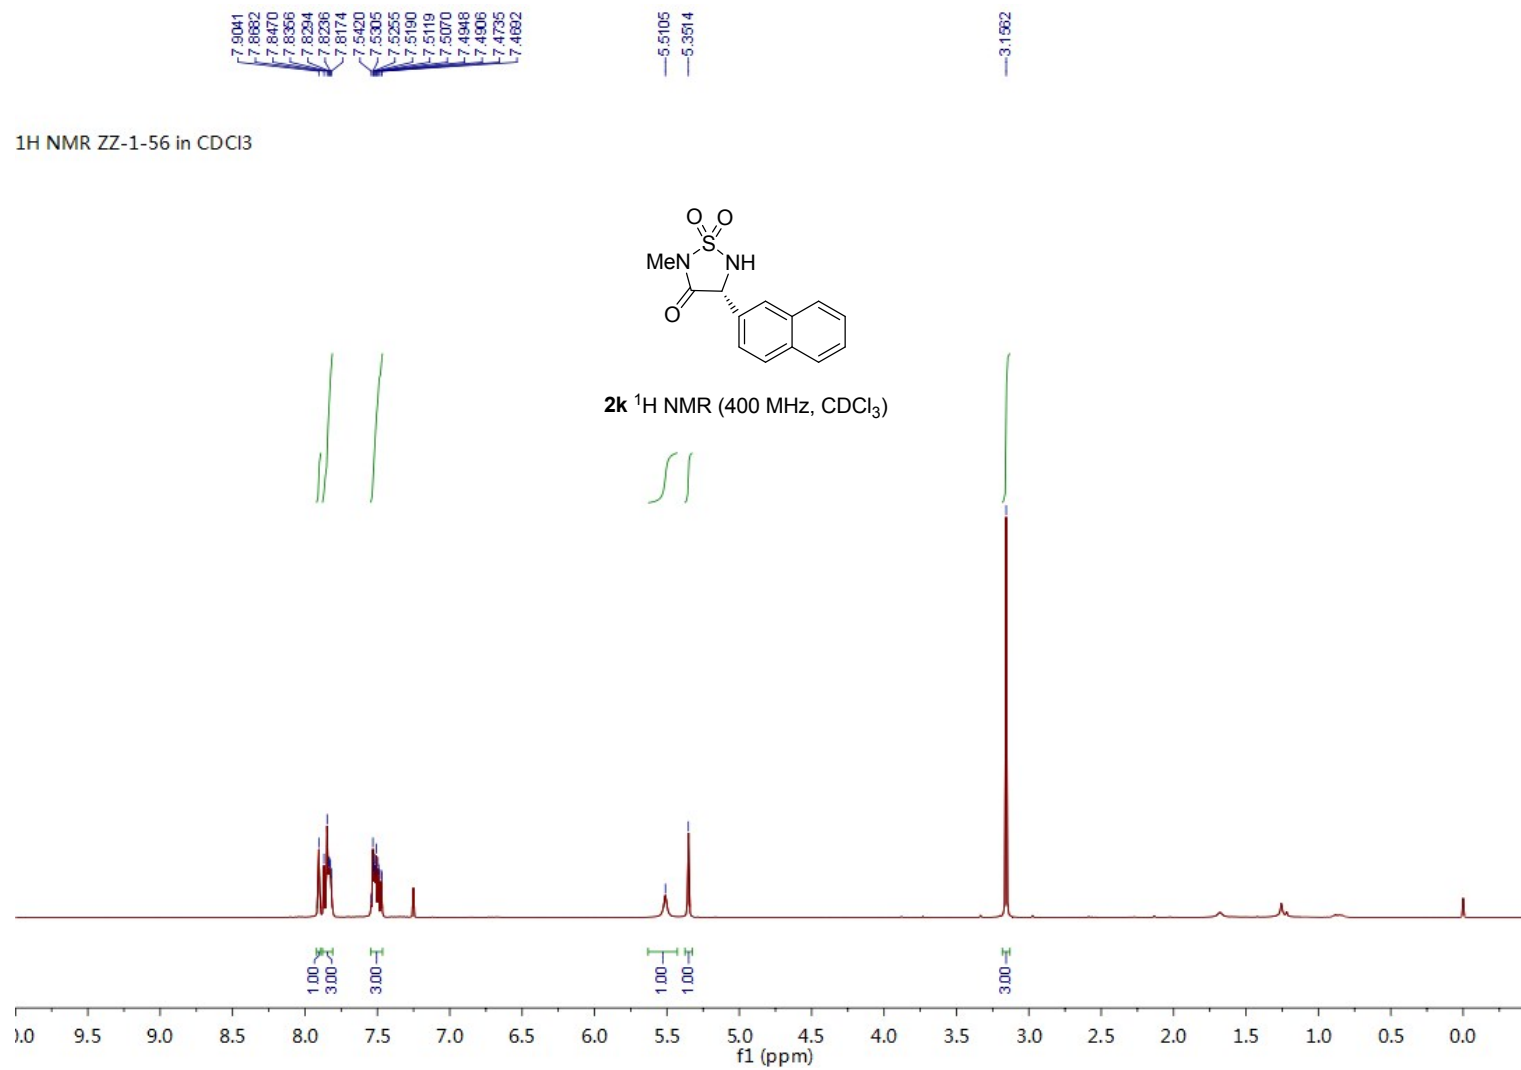

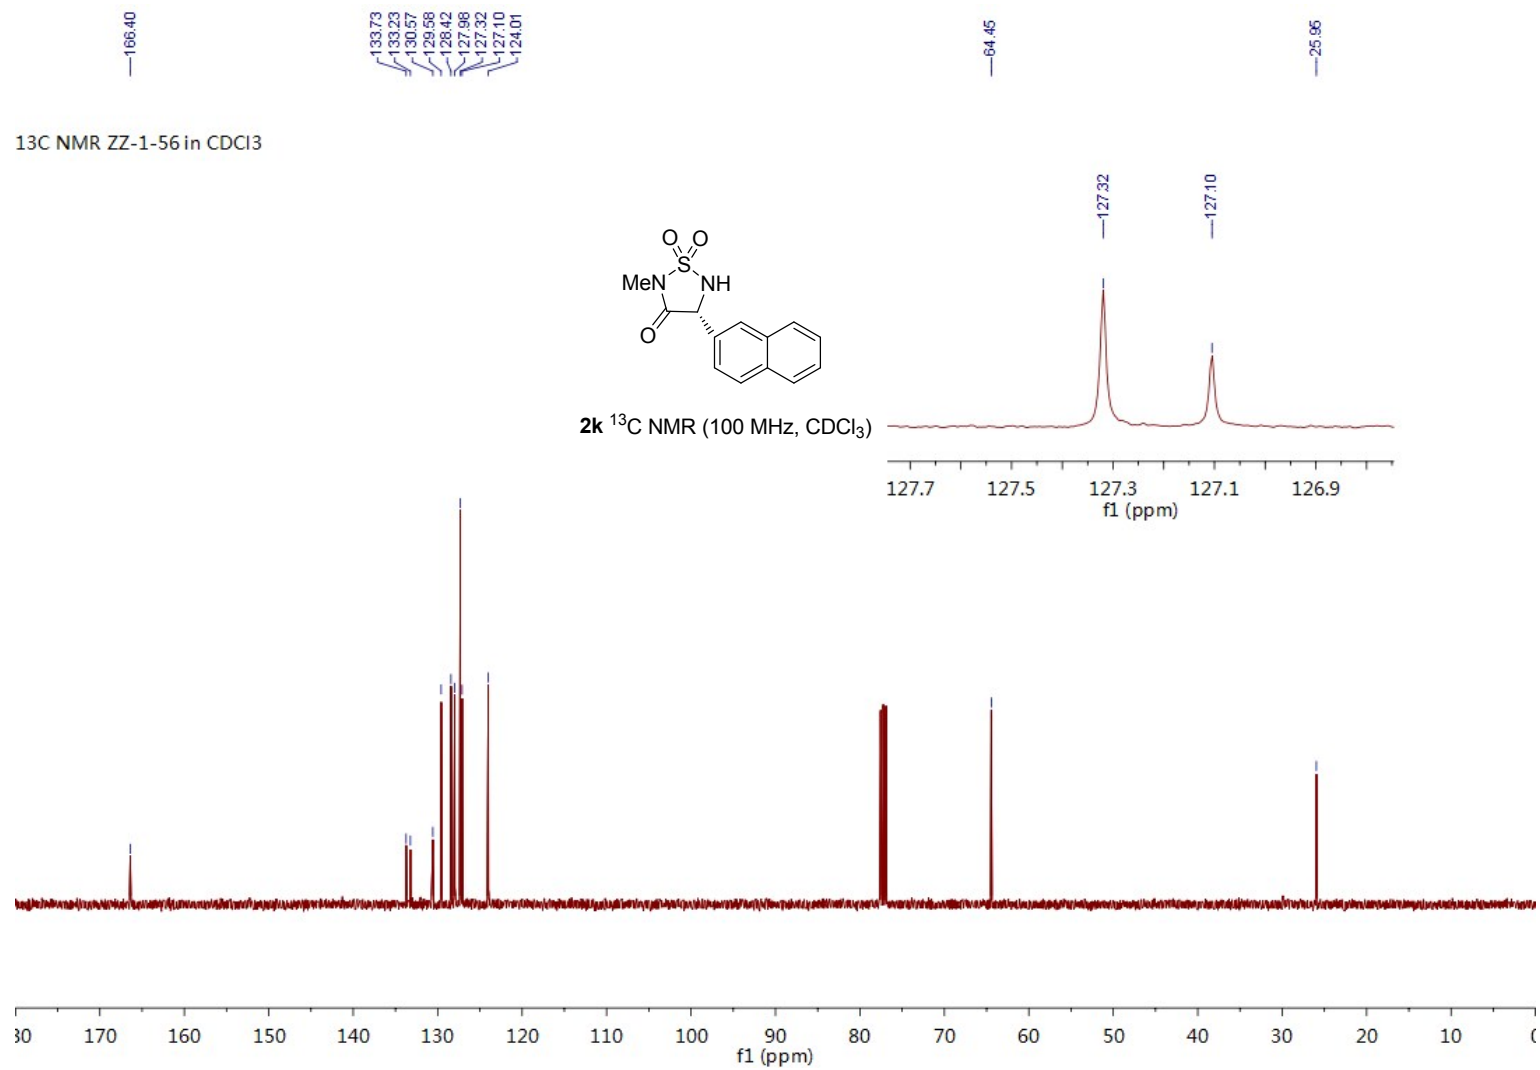

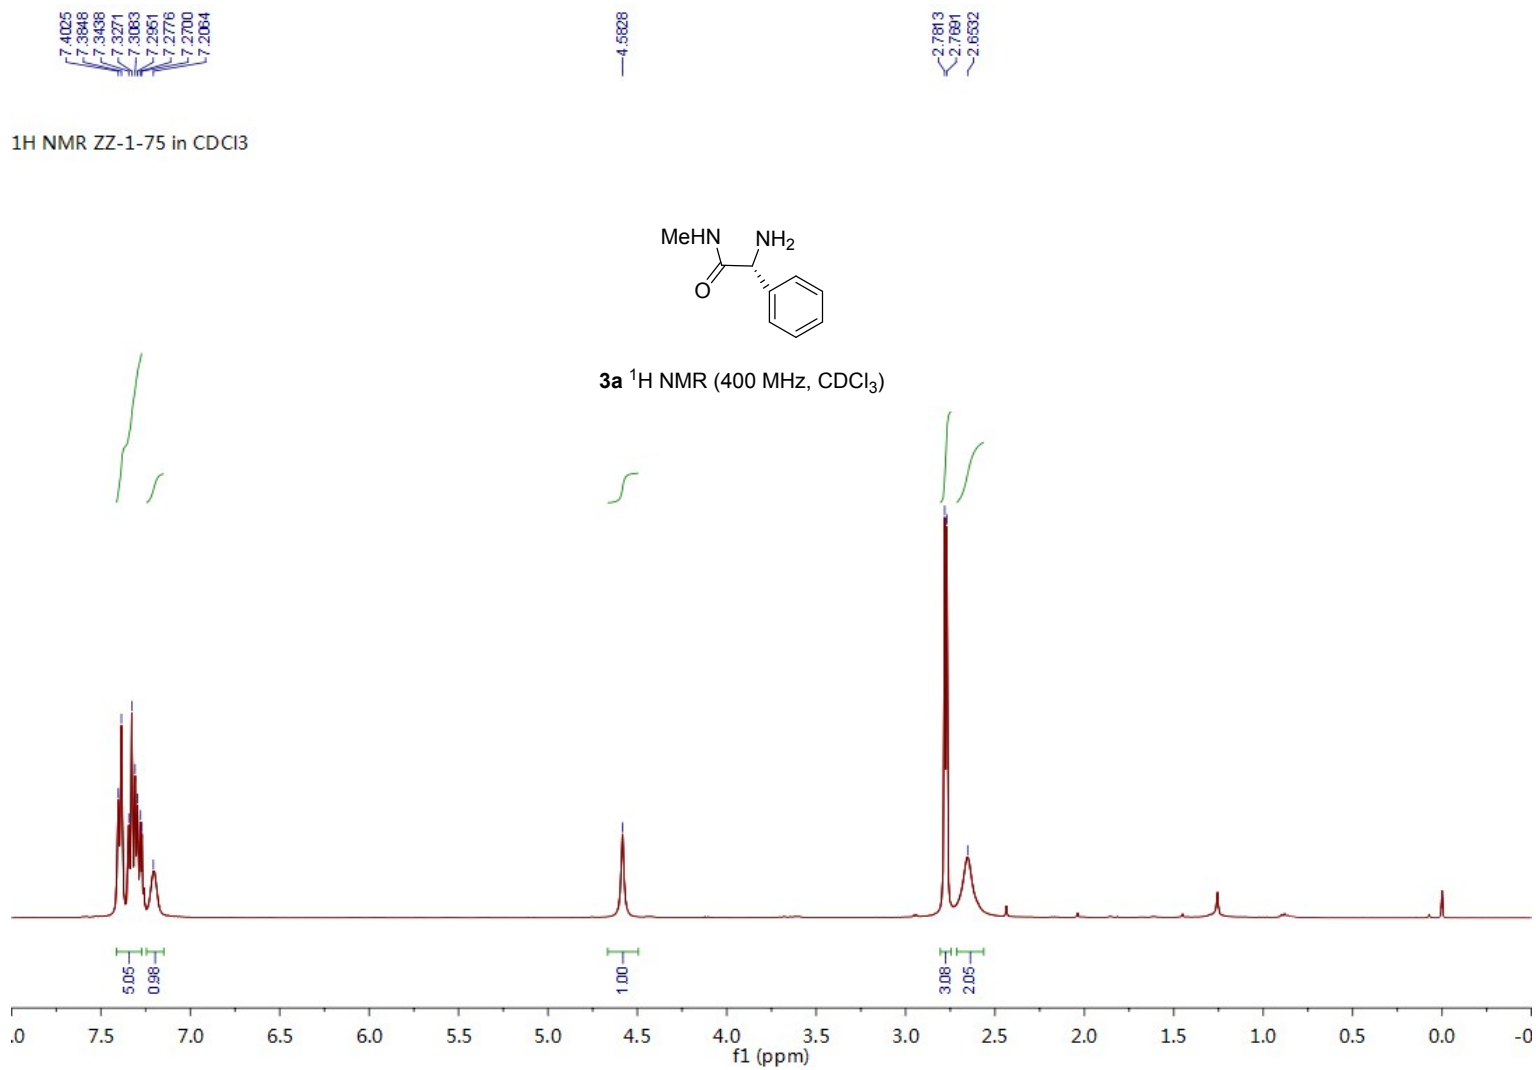

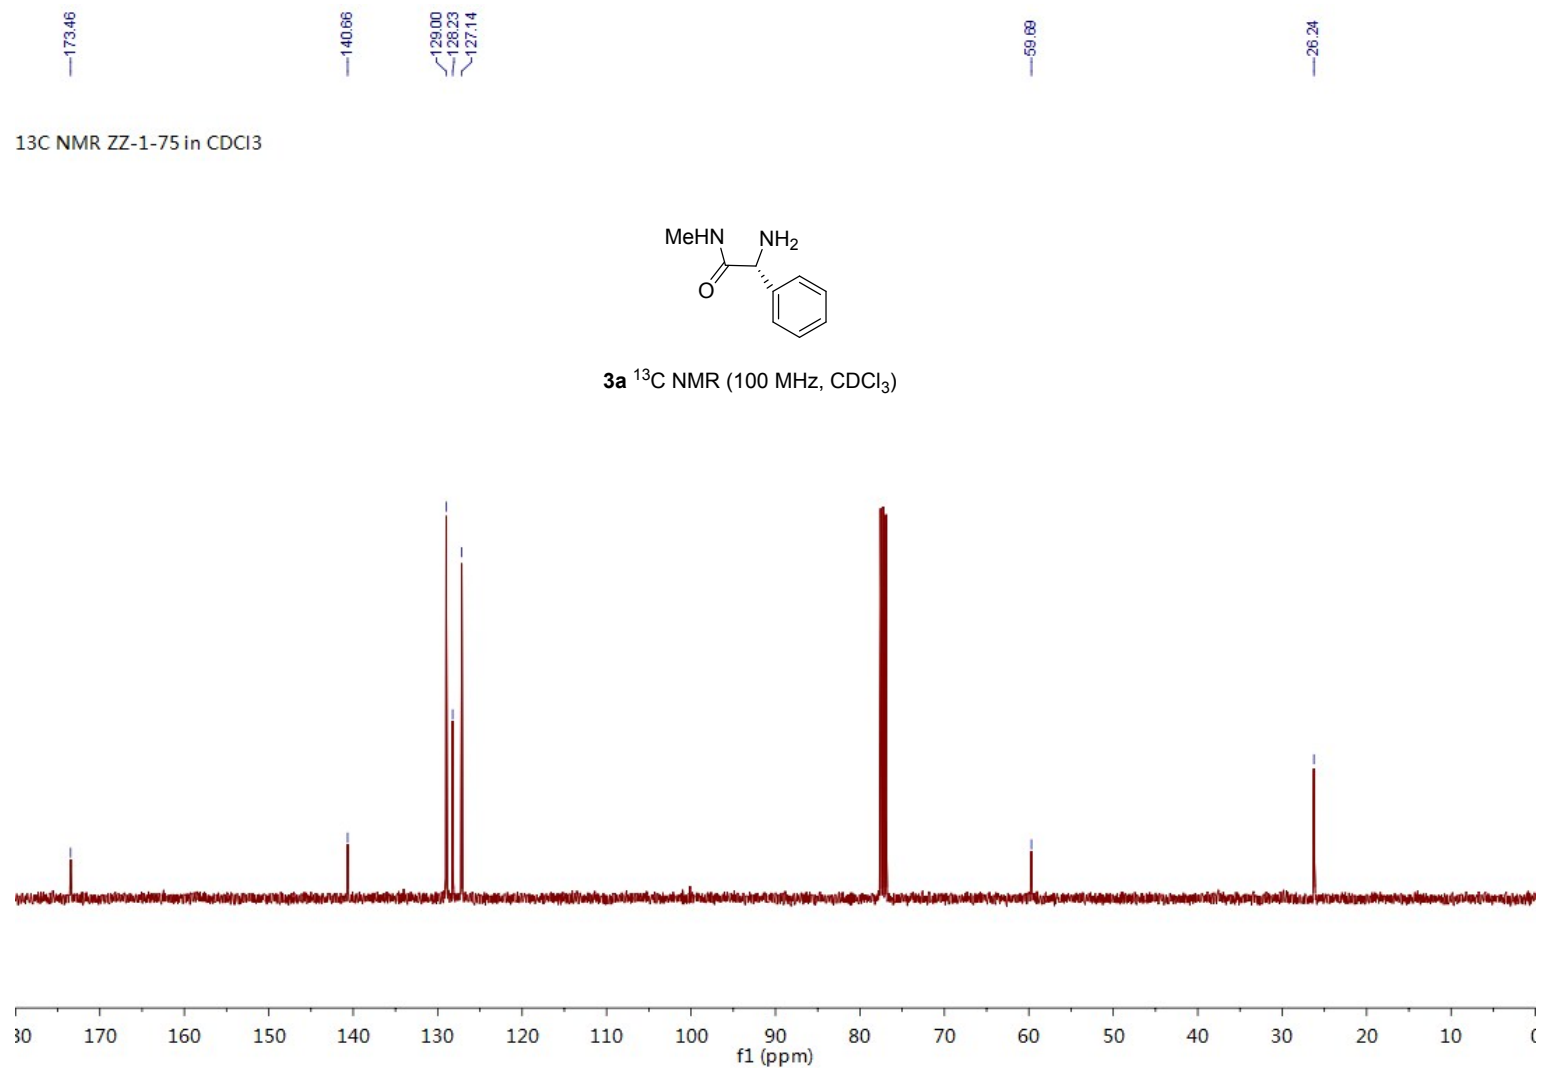

Data File C:\CHEM32\1\DATA\ZHOU-16\YZ010558.D  
 Sample Name: ZZ-1-7(+)

=====  
 Acq. Operator :  
 Acq. Instrument : Instrument 1 Location : Vial 1  
 Injection Date : 5/11/2016 5:37:14 AM  
 Acq. Method : C:\HPCHEM\1\METHODS\DEF.LC.M  
 Last changed : 5/11/2016 4:44:11 AM by  
 (modified after loading)  
 Analysis Method : C:\CHEM32\1\METHODS\DEF.LC.M  
 Last changed : 5/10/2016 8:44:27 PM  
 (modified after loading)  
 Sample Info : AD-H, H/i-PrOH = 85/15, 0.7 mL/min, 30 oC, 220 nm

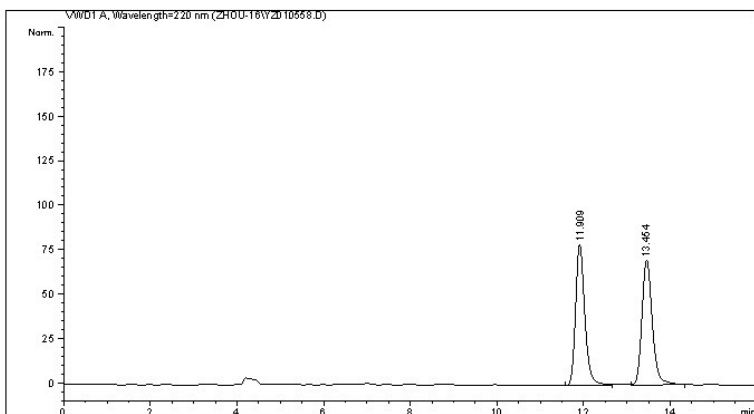

=====  
 Area Percent Report  
 =====  
 Sorted By : Signal  
 Multiplier: : 1.0000  
 Dilution: : 1.0000  
 Sample Amount: : 1.00000 [ng/ul] (not used in calc.)  
 Use Multiplier & Dilution Factor with ISTDs

Signal 1: VWD1 A, Wavelength=220 nm

| Peak # | RetTime [min] | Type | Width [min] | Area [mAU] | Height [%] | Area %  |
|--------|---------------|------|-------------|------------|------------|---------|
| 1      | 11.909        | BB   | 0.2253      | 1173.98059 | 79.23613   | 50.0464 |
| 2      | 13.454        | VB   | 0.2541      | 1171.80359 | 70.30521   | 49.9536 |

Totals : 2345.78418 149.54134

\*\*\* End of Report \*\*\*

Data File C:\CHEM32\1\DATA\ZHOU-16\YZ010557.D  
 Sample Name: ZZ-1-17

=====  
 Acq. Operator :  
 Acq. Instrument : Instrument 1 Location : Vial 1  
 Injection Date : 5/11/2016 5:15:58 AM  
 Acq. Method : C:\HPCHEM\1\METHODS\DEF.LC.M  
 Last changed : 5/11/2016 4:44:11 AM by  
 (modified after loading)  
 Analysis Method : C:\CHEM32\1\METHODS\DEF.LC.M  
 Last changed : 5/10/2016 8:46:51 PM  
 (modified after loading)  
 Sample Info : AD-H, H/i-PrOH = 85/15, 0.7 mL/min, 30 oC, 220 nm

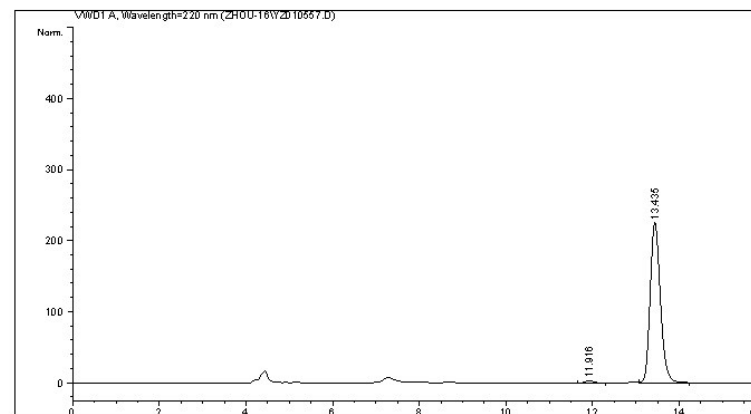

=====  
 Area Percent Report  
 =====  
 Sorted By : Signal  
 Multiplier: : 1.0000  
 Dilution: : 1.0000  
 Sample Amount: : 1.00000 [ng/ul] (not used in calc.)  
 Use Multiplier & Dilution Factor with ISTDs

Signal 1: VWD1 A, Wavelength=220 nm

| Peak # | RetTime [min] | Type | Width [min] | Area [mAU] | Height [%] | Area %  |
|--------|---------------|------|-------------|------------|------------|---------|
| 1      | 11.916        | BB   | 0.2189      | 45.95913   | 3.24885    | 1.2304  |
| 2      | 13.435        | VB   | 0.2538      | 3689.22339 | 225.15433  | 98.7696 |

Totals : 3735.18252 228.40317

\*\*\* End of Report \*\*\*

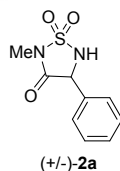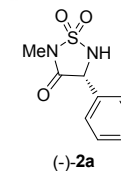

Data File C:\CHEM32\1\DATA\ZHOU-16\YZN000867.D  
 Sample Name: ZZ-1-32A(+)

```

=====
Acq. Operator   :
Acq. Instrument : Instrument 1           Location : Vial 1
Injection Date  : 4/2/2016 8:11:53 PM
Acq. Method     : C:\CHEM32\1\METHODS\DEF_LC.M
Last changed    : 4/2/2016 8:01:03 PM
                 (modified after loading)
Analysis Method : C:\CHEM32\1\METHODS\DEF_LC.M
Last changed    : 5/9/2016 3:30:19 PM
                 (modified after loading)
Sample Info     : IC, H/i-PrOH = 90/10, 0.7mL/min, 30oC, 220 nm
=====
  
```

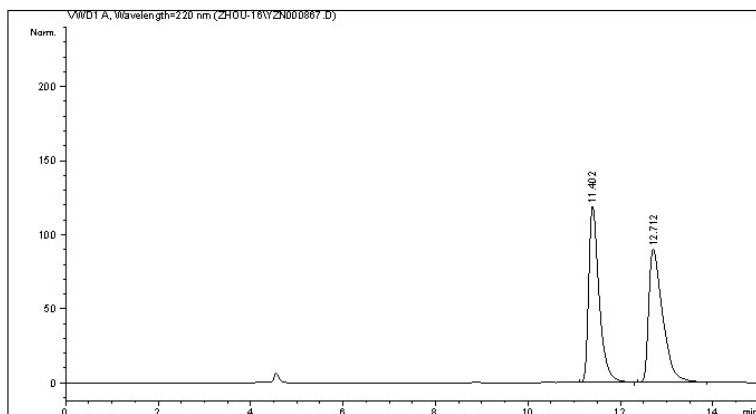

=====  
 Area Percent Report  
 =====

```

Sorted By      :      Simal
Multiplier:    :      1.0000
Dilution:      :      1.0000
Use Multiplier & Dilution Factor with ISTDs
  
```

Signal 1: VWD1 A, Wavelength=220 nm

| Peak # | RetTime [min] | Type | Width [min] | Area [mAU*s] | Height [mAU] | Area %  |
|--------|---------------|------|-------------|--------------|--------------|---------|
| 1      | 11.402        | BB   | 0.2356      | 1867.08289   | 118.89330    | 49.8396 |
| 2      | 12.712        | BB   | 0.3109      | 1879.10205   | 89.86385     | 50.1604 |

Totals : 3746.18494 208.75715

=====  
 \*\*\* End of Report \*\*\*

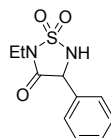

(+/-)-2b

Data File C:\CHEM32\1\DATA\ZHOU-16\YZN000868.D  
 Sample Name: ZZ-1-32B

```

=====
Acq. Operator   :
Acq. Instrument : Instrument 1           Location : Vial 1
Injection Date  : 4/2/2016 8:29:15 PM
Acq. Method     : C:\CHEM32\1\METHODS\DEF_LC.M
Last changed    : 4/2/2016 8:27:22 PM
                 (modified after loading)
Analysis Method : C:\CHEM32\1\METHODS\DEF_LC.M
Last changed    : 5/9/2016 3:32:47 PM
                 (modified after loading)
Sample Info     : IC, H/i-PrOH = 90/10, 0.7mL/min, 30oC, 220 nm
=====
  
```

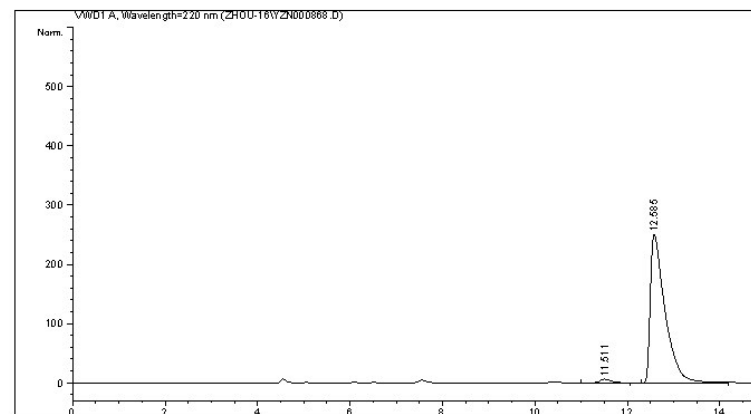

=====  
 Area Percent Report  
 =====

```

Sorted By      :      Simal
Multiplier:    :      1.0000
Dilution:      :      1.0000
Use Multiplier & Dilution Factor with ISTDs
  
```

Signal 1: VWD1 A, Wavelength=220 nm

| Peak # | RetTime [min] | Type | Width [min] | Area [mAU*s] | Height [mAU] | Area %  |
|--------|---------------|------|-------------|--------------|--------------|---------|
| 1      | 11.511        | BB   | 0.2619      | 105.95583    | 6.11288      | 1.8813  |
| 2      | 12.585        | BB   | 0.3199      | 5526.11133   | 250.58168    | 98.1187 |

Totals : 5632.06715 256.69456

=====  
 \*\*\* End of Report \*\*\*

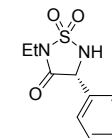

(+)-2b



Data File C:\CHEM32\1\DATA\ZHOU-16\YZ010282.D  
 Sample Name: ZZ-1-34A(+)

```

=====
Acq. Operator   : j
Acq. Instrument : Instrument 1          Location : Vial 1
Injection Date  : 4/7/2016 5:27:11 AM
Acq. Method     : C:\HPCHEM\1\METHODS\DEF LC.M
Last changed    : 4/7/2016 4:59:17 AM by j
                  (modified after loading)
Analysis Method : C:\CHEM32\1\METHODS\DEF_LC.M
Last changed    : 5/9/2016 3:35:31 PM
                  (modified after loading)
Sample Info     : AD-H, H/i-PrOH = 85/15, 0.7 mL/min, 30 oC, 220 nm
=====
  
```

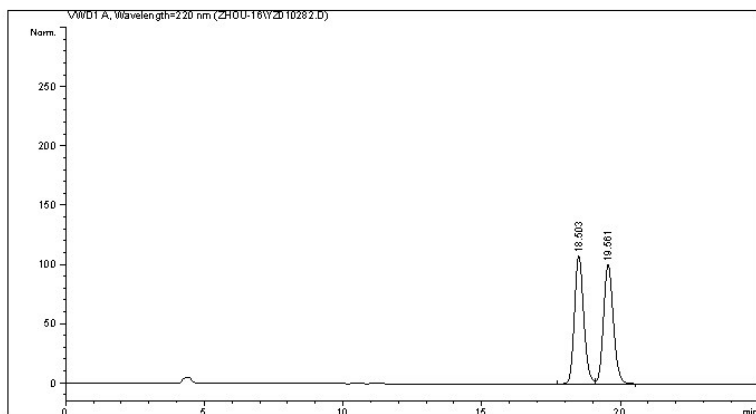

```

=====
                          Area Percent Report
=====
Sorted By      :      Simal
Multiplier:    :      1.0000
Dilution:      :      1.0000
Sample Amount: :      1.00000 [ng/ul] (not used in calc.)
Use Multiplier & Dilution Factor with ISTDs
  
```

Signal 1: VWD1 A, Wavelength=220 nm

| Peak # | RetTime [min] | Type | Width [min] | Area [mAU] | Height [%] | Area %  |
|--------|---------------|------|-------------|------------|------------|---------|
| 1      | 18.503        | BV   | 0.3616      | 2527.86548 | 108.13077  | 50.2307 |
| 2      | 19.561        | VB   | 0.3822      | 2504.64673 | 100.58949  | 49.7693 |

Totals : 5032.51221 208.72026

\*\*\* End of Report \*\*\*

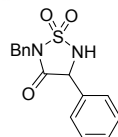

(+/-)-2c

Data File C:\CHEM32\1\DATA\ZHOU-16\YZ010286.D  
 Sample Name: ZZ-1-34B

```

=====
Acq. Operator   : j
Acq. Instrument : Instrument 1          Location : Vial 1
Injection Date  : 4/7/2016 8:09:29 AM
Acq. Method     : C:\HPCHEM\1\METHODS\DEF LC.M
Last changed    : 4/7/2016 7:43:26 AM by j
                  (modified after loading)
Analysis Method : C:\CHEM32\1\METHODS\DEF_LC.M
Last changed    : 5/9/2016 3:36:55 PM
                  (modified after loading)
Sample Info     : AD-H, H/i-PrOH = 85/15, 0.7 mL/min, 30 oC, 220 nm
=====
  
```

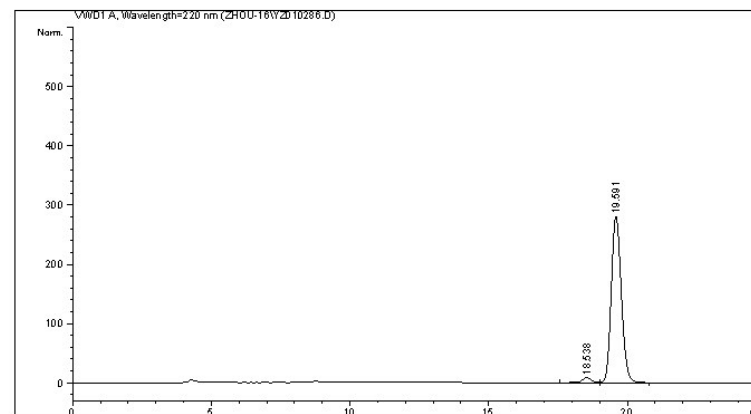

```

=====
                          Area Percent Report
=====
Sorted By      :      Simal
Multiplier:    :      1.0000
Dilution:      :      1.0000
Sample Amount: :      1.00000 [ng/ul] (not used in calc.)
Use Multiplier & Dilution Factor with ISTDs
  
```

Signal 1: VWD1 A, Wavelength=220 nm

| Peak # | RetTime [min] | Type | Width [min] | Area [mAU] | Height [%] | Area %  |
|--------|---------------|------|-------------|------------|------------|---------|
| 1      | 18.538        | VV   | 0.3747      | 209.61920  | 8.46764    | 2.8646  |
| 2      | 19.591        | VB   | 0.3943      | 7107.86621 | 280.80362  | 97.1354 |

Totals : 7317.48541 289.27126

\*\*\* End of Report \*\*\*

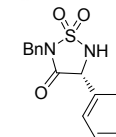

(+)-2c

Data File C:\CHEM32\1\DATA\ZHOU-16\YZ010306.D  
 Sample Name: ZZ-1-35A(+)

=====  
 Acq. Operator : j  
 Acq. Instrument : Instrument 1 Location : Vial 1  
 Injection Date : 4/9/2016 5:29:51 AM  
 Acq. Method : C:\HPCHEM\1\METHODS\DEF LC.M  
 Last changed : 4/9/2016 5:10:22 AM by j  
 (modified after loading)  
 Analysis Method : C:\CHEM32\1\METHODS\DEF\_LC.M  
 Last changed : 5/9/2016 3:39:59 PM  
 (modified after loading)  
 Sample Info : AD-H, H/i-PrOH = 85/15, 0.7 mL/min, 30 oC, 220 nm

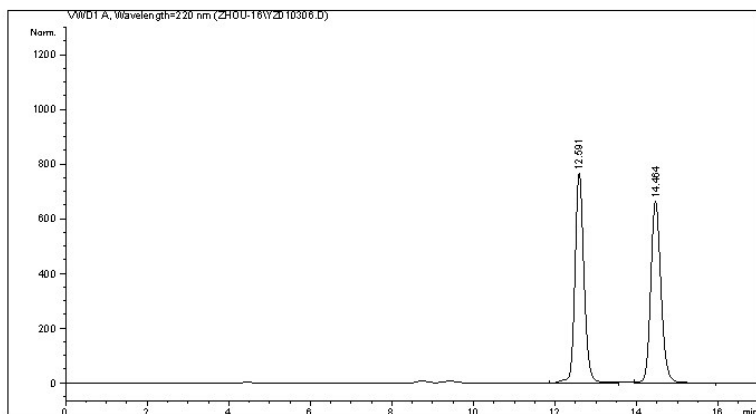

=====  
 Area Percent Report  
 =====  
 Sorted By : Signal  
 Multiplier: : 1.0000  
 Dilution: : 1.0000  
 Sample Amount: : 1.00000 [ng/ul] (not used in calc.)  
 Use Multiplier & Dilution Factor with ISTDs

Signal 1: VWD1 A, Wavelength=220 nm

| Peak # | RetTime [min] | Type | Width [min] | Area mAU  | Height %  | Area %  |
|--------|---------------|------|-------------|-----------|-----------|---------|
| 1      | 12.591        | BB   | 0.2346      | 1.17910e4 | 767.19946 | 50.3791 |
| 2      | 14.464        | VB   | 0.2679      | 1.16136e4 | 664.82758 | 49.6209 |

Totals : 2.34046e4 1432.02704

\*\*\* End of Report \*\*\*

Instrument 1 5/9/2016 3:40:06 PM

Page 1 of 1

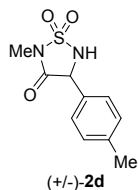

Data File C:\CHEM32\1\DATA\ZHOU-16\YZ010307.D  
 Sample Name: ZZ-1-35B

=====  
 Acq. Operator : j  
 Acq. Instrument : Instrument 1 Location : Vial 1  
 Injection Date : 4/9/2016 5:59:39 AM  
 Acq. Method : C:\HPCHEM\1\METHODS\DEF LC.M  
 Last changed : 4/9/2016 5:10:22 AM by j  
 (modified after loading)  
 Analysis Method : C:\CHEM32\1\METHODS\DEF\_LC.M  
 Last changed : 5/9/2016 3:41:00 PM  
 (modified after loading)  
 Sample Info : AD-H, H/i-PrOH = 85/15, 0.7 mL/min, 30 oC, 220 nm

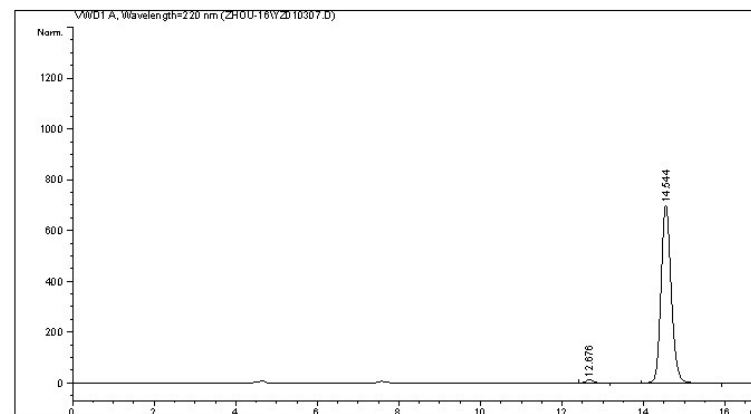

=====  
 Area Percent Report  
 =====  
 Sorted By : Signal  
 Multiplier: : 1.0000  
 Dilution: : 1.0000  
 Sample Amount: : 1.00000 [ng/ul] (not used in calc.)  
 Use Multiplier & Dilution Factor with ISTDs

Signal 1: VWD1 A, Wavelength=220 nm

| Peak # | RetTime [min] | Type | Width [min] | Area mAU  | Height %  | Area %  |
|--------|---------------|------|-------------|-----------|-----------|---------|
| 1      | 12.676        | VB   | 0.2339      | 203.76875 | 13.31237  | 1.6438  |
| 2      | 14.544        | BB   | 0.2668      | 1.21924e4 | 701.49585 | 98.3562 |

Totals : 1.23961e4 714.80822

\*\*\* End of Report \*\*\*

Instrument 1 5/9/2016 3:41:10 PM

Page 1 of 1

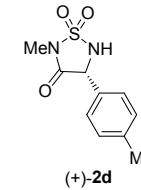

Data File C:\CHEM32\1\DATA\ZHOU-16\YZ010419.D  
 Sample Name: ZZ-1-48A(+)

```

=====
Acq. Operator   :
Acq. Instrument : Instrument 1           Location : Vial 1
Injection Date  : 4/21/2016 6:40:08 AM
Acq. Method     : C:\HPCHEM\1\METHODS\DEF LC.M
Last changed    : 4/21/2016 6:32:59 AM by
                  (modified after loading)
Analysis Method : C:\CHEM32\1\METHODS\DEF LC.M
Last changed    : 5/9/2016 3:57:04 PM
                  (modified after loading)
Sample Info     : AD-H, H/i-PrOH = 85/15, 0.7 mL/min, 30 oC, 220 nm
=====
  
```

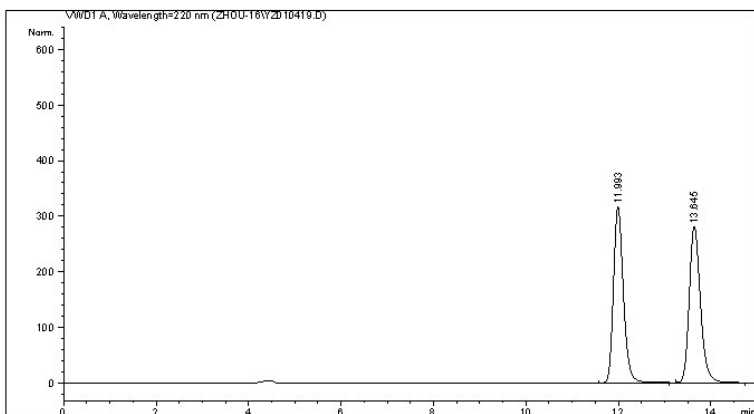

```

=====
                          Area Percent Report
=====
Sorted By      :          Signal
Multiplier:    :          1.0000
Dilution:      :          1.0000
Sample Amount: :          1.00000 [ng/ul] (not used in calc.)
Use Multiplier & Dilution Factor with ISTDs
  
```

```

Signal 1: VWD1 A, Wavelength=220 nm
Peak # RetTime Type Width Area Height Area
     [min] [min] [min] mAU %s [mAU] %
-----|-----|-----|-----|-----|-----|
1 11.993 BB 0.2294 4732.86768 317.16467 50.0463
2 13.645 BB 0.2572 4724.11279 281.16769 49.9537
Totals :                9456.98047 598.33237
  
```

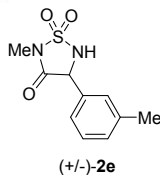

Data File C:\CHEM32\1\DATA\ZHOU-16\YZ010420.D  
 Sample Name: ZZ-1-48B

```

=====
Acq. Operator   :
Acq. Instrument : Instrument 1           Location : Vial 1
Injection Date  : 4/21/2016 7:01:05 AM
Acq. Method     : C:\HPCHEM\1\METHODS\DEF LC.M
Last changed    : 4/21/2016 6:32:59 AM by
                  (modified after loading)
Analysis Method : C:\CHEM32\1\METHODS\DEF LC.M
Last changed    : 5/9/2016 3:58:08 PM
                  (modified after loading)
Sample Info     : AD-H, H/i-PrOH = 85/15, 0.7 mL/min, 30 oC, 220 nm
=====
  
```

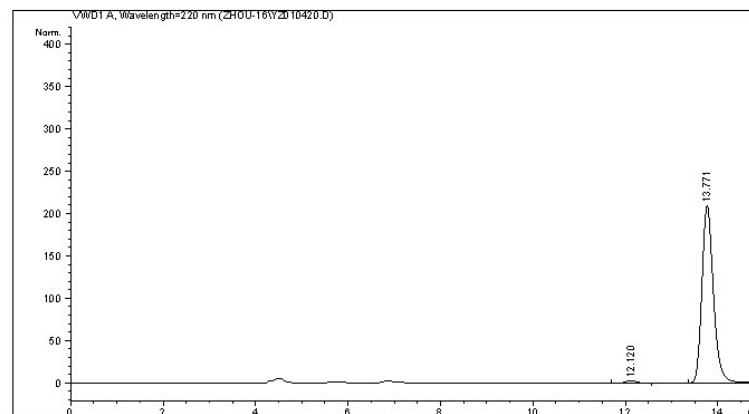

```

=====
                          Area Percent Report
=====
Sorted By      :          Signal
Multiplier:    :          1.0000
Dilution:      :          1.0000
Sample Amount: :          1.00000 [ng/ul] (not used in calc.)
Use Multiplier & Dilution Factor with ISTDs
  
```

```

Signal 1: VWD1 A, Wavelength=220 nm
Peak # RetTime Type Width Area Height Area
     [min] [min] [min] mAU %s [mAU] %
-----|-----|-----|-----|-----|-----|
1 12.120 BB 0.2283 44.19563 2.95682 1.2137
2 13.771 BB 0.2629 3597.23608 209.49031 98.7863
Totals :                3641.43171 212.44713
  
```

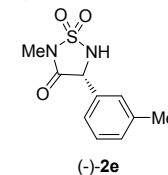

Data File C:\CHEM32\1\DATA\ZHOU-16\YZN001248.D  
 Sample Name: ZZ-1-58A(+)

=====  
 Acq. Operator :  
 Acq. Instrument : Instrument 1 Location : Vial 1  
 Injection Date : 5/3/2016 2:57:22 PM  
 Acq. Method : C:\CHEM32\1\METHODS\DEF\_LC.M  
 Last changed : 5/3/2016 2:48:20 PM  
 (modified after loading)  
 Analysis Method : C:\CHEM32\1\METHODS\DEF\_LC.M  
 Last changed : 5/9/2016 3:59:26 PM  
 (modified after loading)  
 Sample Info : AS-H, Hex/i-PrOH = 70/30, 0.7 mL/min, 30oC, 220 nm

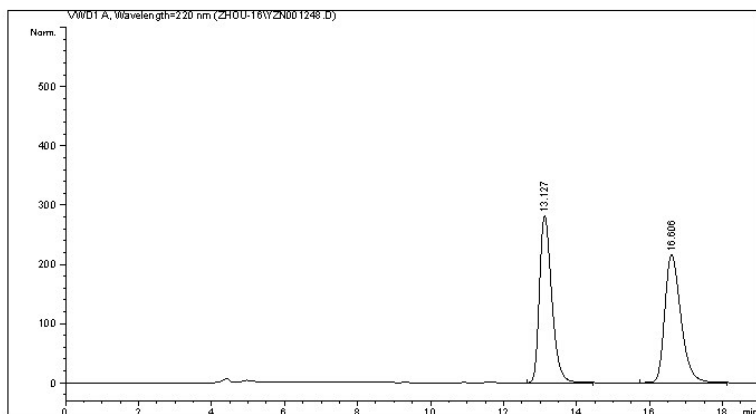

=====  
 Area Percent Report  
 =====  
 Sorted By : Signal  
 Multiplier: : 1.0000  
 Dilution: : 1.0000  
 Use Multiplier & Dilution Factor with ISTDs

Signal 1: VWD1 A, Wavelength=220 nm

| Peak # | RetTime [min] | Type | Width [min] | Area [mAU *s] | Height [mAU] | Area %  |
|--------|---------------|------|-------------|---------------|--------------|---------|
| 1      | 13.127        | BB   | 0.3599      | 6583.14404    | 281.85156    | 49.8542 |
| 2      | 16.606        | BB   | 0.4712      | 6621.63623    | 215.98576    | 50.1458 |

Totals : 1.32048e4 497.83733

=====  
 \*\*\* End of Report \*\*\*

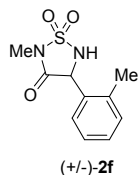

Data File C:\CHEM32\1\DATA\ZHOU-16\YZN001269.D  
 Sample Name: ZZ-1-59

=====  
 Acq. Operator :  
 Acq. Instrument : Instrument 1 Location : Vial 1  
 Injection Date : 5/5/2016 3:44:16 PM  
 Acq. Method : C:\CHEM32\1\METHODS\DEF\_LC.M  
 Last changed : 5/5/2016 3:00:42 PM  
 (modified after loading)  
 Analysis Method : C:\CHEM32\1\METHODS\DEF\_LC.M  
 Last changed : 5/9/2016 4:01:56 PM  
 (modified after loading)  
 Sample Info : AS-H, Hex/i-PrOH = 70/30, 0.7 mL/min, 30oC, 220 nm

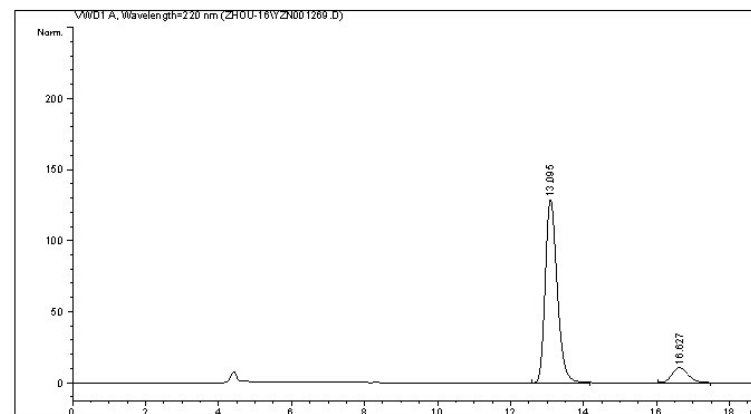

=====  
 Area Percent Report  
 =====  
 Sorted By : Signal  
 Multiplier: : 1.0000  
 Dilution: : 1.0000  
 Use Multiplier & Dilution Factor with ISTDs

Signal 1: VWD1 A, Wavelength=220 nm

| Peak # | RetTime [min] | Type | Width [min] | Area [mAU *s] | Height [mAU] | Area %  |
|--------|---------------|------|-------------|---------------|--------------|---------|
| 1      | 13.095        | BB   | 0.3507      | 2939.56470    | 128.81834    | 90.1447 |
| 2      | 16.627        | BB   | 0.4701      | 321.37704     | 10.55816     | 9.8553  |

Totals : 3260.94174 139.37651

=====  
 \*\*\* End of Report \*\*\*

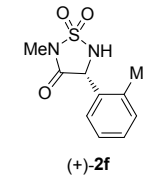

Data File C:\CHEM32\1\DATA\ZHOU-16\YZ010338.D  
 Sample Name: ZZ-1-41A(+)

=====  
 Acq. Operator :  
 Acq. Instrument : Instrument 1 Location : Vial 1  
 Injection Date : 4/13/2016 5:56:08 AM  
 Acq. Method : C:\HPCHEM\1\METHODS\DEF LC.M  
 Last changed : 4/13/2016 5:33:04 AM by  
 (modified after loading)  
 Analysis Method : C:\CHEM32\1\METHODS\DEF\_LC.M  
 Last changed : 5/9/2016 3:54:47 PM  
 (modified after loading)  
 Sample Info : AD-H, H/i-PrOH = 85/15, 0.7 mL/min, 30 oC, 220 nm

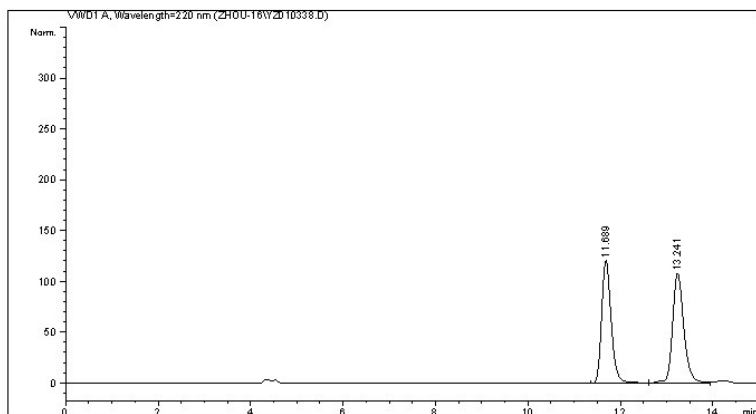

=====  
 Area Percent Report  
 =====  
 Sorted By : Sigmal  
 Multiplier: : 1.0000  
 Dilution: : 1.0000  
 Sample Amount: : 1.00000 [ng/ul] (not used in calc.)  
 Use Multiplier & Dilution Factor with ISTDs

Signal 1: VWD1 A, Wavelength=220 nm

| Peak #   | RetTime [min] | Type | Width [min] | Area mAU   | Area %    | Height [mAU] | Area % |
|----------|---------------|------|-------------|------------|-----------|--------------|--------|
| 1        | 11.689        | BV   | 0.2215      | 1753.58655 | 120.96341 | 48.5493      |        |
| 2        | 13.241        | VB   | 0.2595      | 1858.38196 | 108.51495 | 51.4507      |        |
| Totals : |               |      |             | 3611.96851 |           | 229.47836    |        |

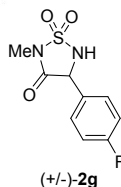

Data File C:\CHEM32\1\DATA\ZHOU-16\YZ010357.D  
 Sample Name: ZZ-1-45

=====  
 Acq. Operator :  
 Acq. Instrument : Instrument 1 Location : Vial 1  
 Injection Date : 4/16/2016 8:58:05 AM  
 Acq. Method : C:\HPCHEM\1\METHODS\DEF LC.M  
 Last changed : 4/16/2016 8:47:36 AM by  
 (modified after loading)  
 Analysis Method : C:\CHEM32\1\METHODS\DEF\_LC.M  
 Last changed : 5/9/2016 3:56:08 PM  
 (modified after loading)  
 Sample Info : AD-H, H/i-PrOH = 85/15, 0.7 mL/min, 30 oC, 220 nm

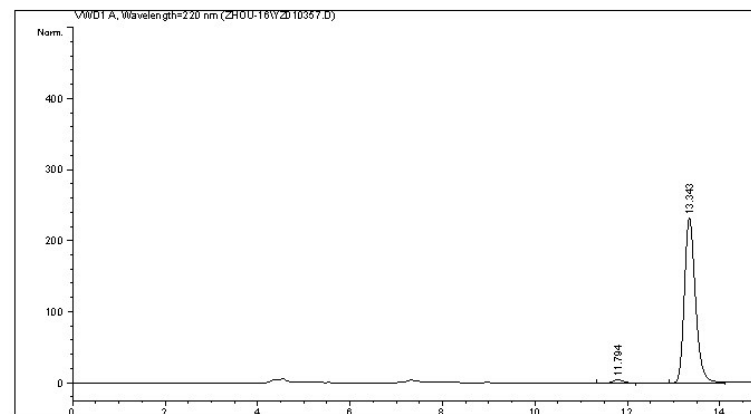

=====  
 Area Percent Report  
 =====  
 Sorted By : Sigmal  
 Multiplier: : 1.0000  
 Dilution: : 1.0000  
 Sample Amount: : 1.00000 [ng/ul] (not used in calc.)  
 Use Multiplier & Dilution Factor with ISTDs

Signal 1: VWD1 A, Wavelength=220 nm

| Peak #   | RetTime [min] | Type | Width [min] | Area mAU   | Area %    | Height [mAU] | Area % |
|----------|---------------|------|-------------|------------|-----------|--------------|--------|
| 1        | 11.794        | BB   | 0.2198      | 63.38647   | 4.38014   | 1.6105       |        |
| 2        | 13.343        | VB   | 0.2541      | 3872.34497 | 232.44867 | 98.3895      |        |
| Totals : |               |      |             | 3935.73145 |           | 236.82881    |        |

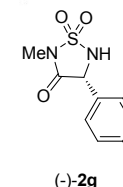

Data File C:\CHEM32\1\DATA\ZHOU-16\YZ010216.D  
 Sample Name: ZZ-1-27(+)

```

=====
Acq. Operator   : j
Acq. Instrument : Instrument 1          Location : Vial 1
Injection Date  : 3/31/2016 11:23:10 AM
Acq. Method     : C:\HPCHEM\1\METHODS\DEF.LC.M
Last changed    : 3/31/2016 11:16:13 AM by j
                  (modified after loading)
Analysis Method : C:\CHEM32\1\METHODS\DEF.LC.M
Last changed    : 5/9/2016 3:03:03 PM
                  (modified after loading)
Sample Info     : AD-H, H/i-PrOH =90/10, 0.7 mL/min, 30 oC, 220 nm
=====
  
```

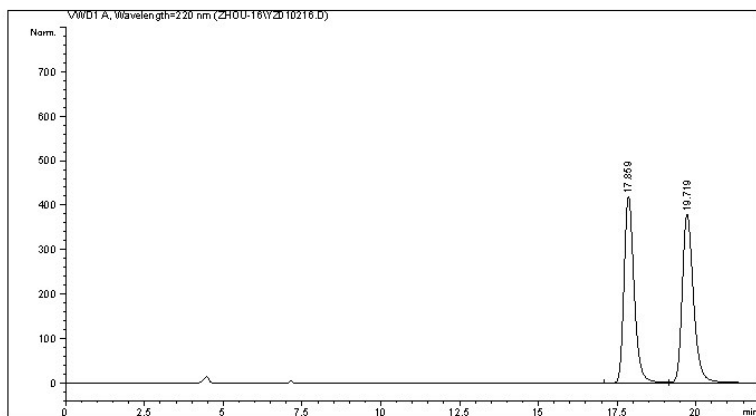

Area Percent Report

```

=====
Sorted By      :      Signal
Multiplier:    :      1.0000
Dilution:      :      1.0000
Sample Amount: :      1.00000 [ng/ul] (not used in calc.)
Use Multiplier & Dilution Factor with ISTDs
=====
  
```

Signal 1: VWD1 A, Wavelength=220 nm

| Peak # | RetTime [min] | Type | Width [min] | Area [MAU] | Height [%s] | Area %  |
|--------|---------------|------|-------------|------------|-------------|---------|
| 1      | 17.859        | BV   | 0.3422      | 9393.56641 | 420.48749   | 49.6179 |
| 2      | 19.719        | VB   | 0.3848      | 9538.24805 | 379.71072   | 50.3821 |

Totals : 1.89318e4 800.19821

\*\*\* End of Report \*\*\*

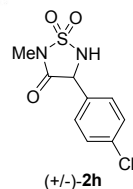

Data File C:\CHEM32\1\DATA\ZHOU-16\YZ010321.D  
 Sample Name: ZZ-1-38

```

=====
Acq. Operator   :
Acq. Instrument : Instrument 1          Location : Vial 1
Injection Date  : 4/10/2016 11:56:20 AM
Acq. Method     : C:\HPCHEM\1\METHODS\DEF.LC.M
Last changed    : 4/10/2016 11:31:46 AM by
                  (modified after loading)
Analysis Method : C:\CHEM32\1\METHODS\DEF.LC.M
Last changed    : 5/9/2016 3:05:36 PM
                  (modified after loading)
Sample Info     : AD-H, H/i-PrOH = 90/10, 0.7 mL/min, 30 oC, 220 nm
=====
  
```

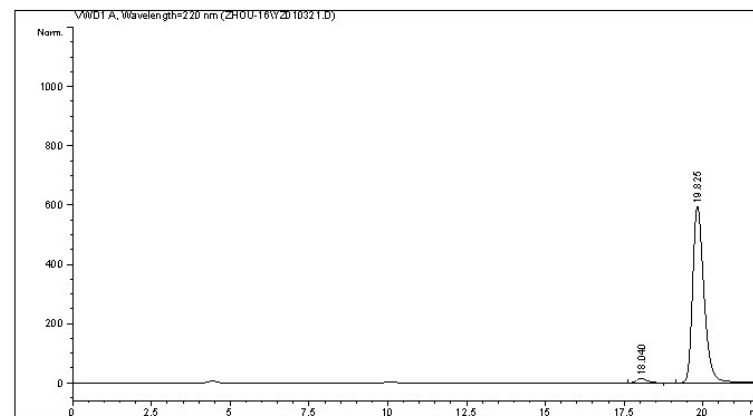

Area Percent Report

```

=====
Sorted By      :      Signal
Multiplier:    :      1.0000
Dilution:      :      1.0000
Sample Amount: :      1.00000 [ng/ul] (not used in calc.)
Use Multiplier & Dilution Factor with ISTDs
=====
  
```

Signal 1: VWD1 A, Wavelength=220 nm

| Peak # | RetTime [min] | Type | Width [min] | Area [MAU] | Height [%s] | Area %  |
|--------|---------------|------|-------------|------------|-------------|---------|
| 1      | 18.040        | BE   | 0.3507      | 335.21701  | 14.68941    | 2.2012  |
| 2      | 19.825        | BE   | 0.3816      | 1.48934e4  | 596.35004   | 97.7988 |

Totals : 1.52286e4 611.03945

\*\*\* End of Report \*\*\*

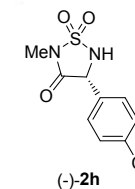

Data File C:\CHEM32\1\DATA\ZHOU-16\YZ010337.D  
 Sample Name: ZZ-1-39(+)

```

=====
Acq. Operator   :
Acq. Instrument : Instrument 1           Location : Vial 1
Injection Date  : 4/13/2016 4:49:31 AM
Acq. Method     : C:\HPCHEM\1\METHODS\DEF_LC.M
Last changed    : 4/13/2016 4:38:35 AM by
                  (modified after loading)
Analysis Method : C:\CHEM32\1\METHODS\DEF_LC.M
Last changed    : 5/9/2016 3:51:26 PM
                  (modified after loading)
Sample Info     : AD-H, H/i-PrOH = 90/10, 0.7 mL/min, 30 oC, 220 nm
  
```

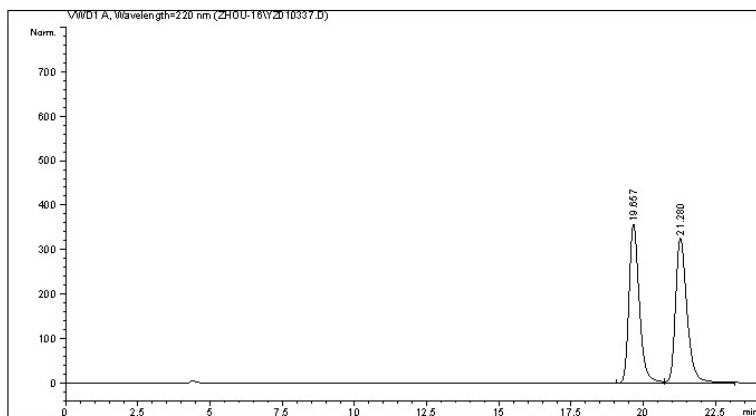

Area Percent Report

```

=====
Sorted By      :          Sigma
Multiplier:    :          1.0000
Dilution:      :          1.0000
Sample Amount: :          1.00000 [ng/ul] (not used in calc.)
Use Multiplier & Dilution Factor with ISTDs
  
```

Signal 1: VWD1 A, Wavelength=220 nm

| Peak # | RetTime [min] | Type | Width [min] | Area [mAU] | Height [%s] | Area %  |
|--------|---------------|------|-------------|------------|-------------|---------|
| 1      | 19.657        | BV   | 0.3784      | 8827.71484 | 357.42062   | 49.6512 |
| 2      | 21.280        | WB   | 0.4202      | 8951.73926 | 325.16458   | 50.3488 |

Totals : 1.77795e4 682.58521

\*\*\* End of Report \*\*\*

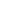

Data File C:\CHEM32\1\DATA\ZHOU-16\YZ010337.D  
 Sample Name: ZZ-1-40

```

=====
Acq. Operator   :
Acq. Instrument : Instrument 1           Location : Vial 1
Injection Date  : 4/13/2016 2:12:00 AM
Acq. Method     : C:\HPCHEM\1\METHODS\DEF_LC.M
Last changed    : 4/13/2016 1:26:30 AM by
                  (modified after loading)
Analysis Method : C:\CHEM32\1\METHODS\DEF_LC.M
Last changed    : 5/9/2016 3:52:20 PM
                  (modified after loading)
Sample Info     : AD-H, H/i-PrOH = 90/10, 0.7 mL/min, 30 oC, 220 nm
  
```

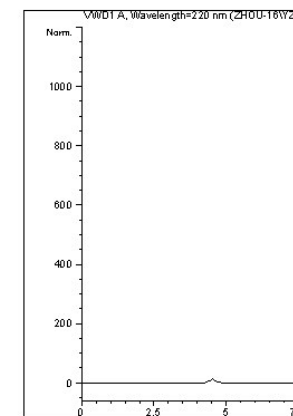

Area Percent Report

```

=====
Sorted By      :          Sigma
Multiplier:    :          1.0000
Dilution:      :          1.0000
Sample Amount: :          1.00000 [ng/ul] (not used in calc.)
Use Multiplier & Dilution Factor with ISTDs
  
```

Signal 1: VWD1 A, Wavelength=220 nm

| Peak # | RetTime [min] | Type | Width [min] | Area [mAU] | Height [%s] | Area %  |
|--------|---------------|------|-------------|------------|-------------|---------|
| 1      | 19.838        | VV   | 0.4066      | 504.597    | 325.16458   | 50.3488 |
| 2      | 21.380        | WB   | 0.4285      | 1.71497    | 325.16458   | 50.3488 |

Totals : 1.76543e4

\*\*\* End of Report \*\*\*

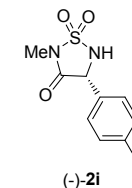

Data File C:\CHEM32\1\DATA\ZHOU-16\YZ010312.D  
 Sample Name: ZZ-1-36A(+)

```

=====
Acq. Operator   :
Acq. Instrument : Instrument 1          Location : Vial 1
Injection Date  : 4/9/2016 10:13:50 AM
Acq. Method     : C:\HPCHEM\1\METHODS\DEF_LC.M
Last changed    : 4/9/2016 9:24:32 AM by
                  (modified after loading)
Analysis Method : C:\CHEM32\1\METHODS\DEF_LC.M
Last changed    : 5/9/2016 3:45:20 PM
                  (modified after loading)
Sample Info     : AD-H, H/i-PrOH = 85/15, 0.7 mL/min, 30 oC, 220 nm
  
```

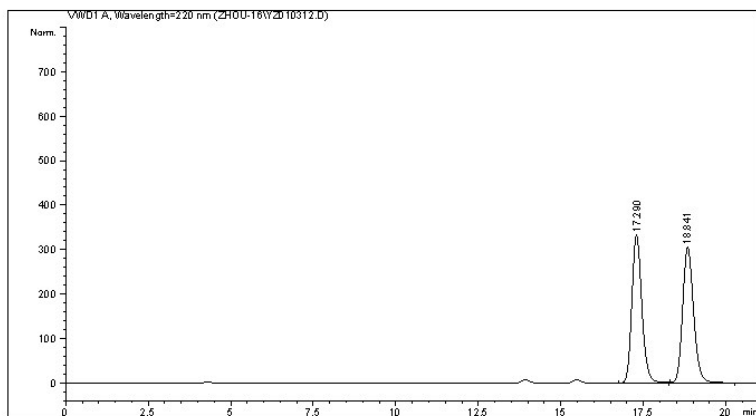

Area Percent Report

```

=====
Sorted By      :      Signal
Multiplier:    :      1.0000
Dilution:      :      1.0000
Sample Amount: :      1.00000 [ng/ul] (not used in calc.)
Use Multiplier & Dilution Factor with ISTDs
  
```

Signal 1: VWD1 A, Wavelength=220 nm

| Peak #   | RetTime [min] | Type | Width [min] | Area mAU   | Height %s | Area %  |
|----------|---------------|------|-------------|------------|-----------|---------|
| 1        | 17.290        | BB   | 0.3251      | 7039.30420 | 333.15082 | 49.8774 |
| 2        | 18.841        | BB   | 0.3564      | 7073.91309 | 305.12646 | 50.1226 |
| Totals : |               |      |             | 1.41132e4  | 638.27728 |         |

\*\*\* End of Report \*\*\*



Data File C:\CHEM32\1\DATA\ZHOU-16\YZ010317.D  
 Sample Name: ZZ-1-57

```

=====
Acq. Operator   :
Acq. Instrument : Instrument 1          Location : Vial 1
Injection Date  : 5/1/2016 5:28:30 AM
Acq. Method     : C:\HPCHEM\1\METHODS\DEF_LC.M
Last changed    : 5/1/2016 5:06:30 AM by
                  (modified after loading)
Analysis Method : C:\CHEM32\1\METHODS\DEF_LC.M
Last changed    : 5/9/2016 3:47:32 PM
                  (modified after loading)
Sample Info     : AD-H, H/i-PrOH = 85/15, 0.7 mL/min, 30 oC, 220 nm
  
```

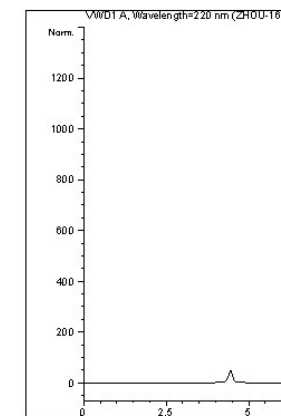

Area Percent Report

```

=====
Sorted By      :      Signal
Multiplier:    :      1.0000
Dilution:      :      1.0000
Sample Amount: :      1.00000 [ng/ul] (not used in calc.)
Use Multiplier & Dilution Factor with ISTDs
  
```

Signal 1: VWD1 A, Wavelength=220 nm

| Peak #   | RetTime [min] | Type | Width [min] | Area mAU | Height %s | Area %   |
|----------|---------------|------|-------------|----------|-----------|----------|
| 1        | 17.080        | BB   | 0.3453      | 251.5082 | 305.12646 | 251.5082 |
| 2        | 18.572        | BB   | 0.3516      | 1.47810  |           |          |
| Totals : |               |      |             | 1.50328  |           |          |

\*\*\* End of Report \*\*\*

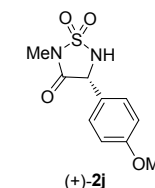



Data File C:\CHEM32\1\DATA\ZHOU-16\YZN001265.D  
 Sample Name: ZZ-1-56A(+)

=====  
 Acq. Operator :  
 Acq. Instrument : Instrument 1 Location : Vial 1  
 Injection Date : 5/4/2016 6:49:36 PM  
 Acq. Method : C:\CHEM32\1\METHODS\DEF\_LC.M  
 Last changed : 5/4/2016 5:51:32 PM  
 (modified after loading)  
 Analysis Method : C:\CHEM32\1\METHODS\DEF\_LC.M  
 Last changed : 5/9/2016 4:03:07 PM  
 (modified after loading)  
 Sample Info : 0J-H, Hex/i-PrOH = 70/30, 0.7 mL/min, 30oC, 220 nm

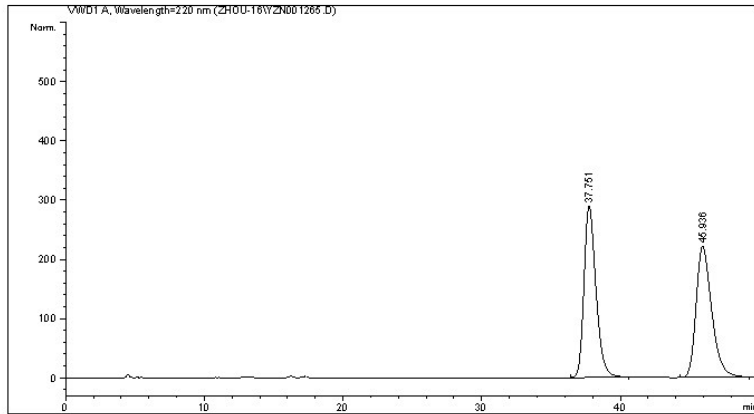

=====  
 Area Percent Report  
 =====

Sorted By : Signal  
 Multiplier: : 1.0000  
 Dilution: : 1.0000  
 Use Multiplier & Dilution Factor with ISTDs

Signal 1: VWD1 A, Wavelength=220 nm

| Peak #   | RetTime [min] | Type | Width [min] | Area [mAU] | Height [%] | Area %  |
|----------|---------------|------|-------------|------------|------------|---------|
| 1        | 37.751        | BB   | 0.9156      | 1.73535e4  | 289.18442  | 50.1100 |
| 2        | 45.936        | BB   | 1.1919      | 1.72773e4  | 221.28200  | 49.8900 |
| Totals : |               |      |             | 3.46308e4  | 510.46642  |         |

=====  
 \*\*\* End of Report \*\*\*



(+/-)-2k

Data File C:\CHEM32\1\DATA\ZHOU-16  
 Sample Name: ZZ-1-56B

=====  
 Acq. Operator :  
 Acq. Instrument : Instrument 1  
 Injection Date : 5/4/2016 7:4  
 Acq. Method : C:\CHEM32\1  
 Last changed : 5/4/2016 7:4  
 (modified af  
 Analysis Method : C:\CHEM32\1  
 Last changed : 5/9/2016 4:0  
 (modified af  
 Sample Info : 0J-H, Hex/i-

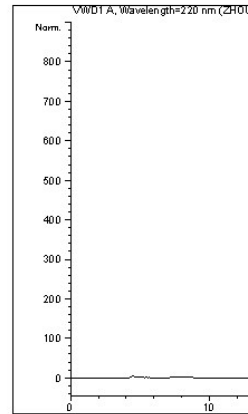

=====  
 Area  
 =====

Sorted By : S  
 Multiplier: :  
 Dilution:  
 Use Multiplier & Dilution Factor

Signal 1: VWD1 A, Wavelength=2

| Peak #   | RetTime [min] | Type | Width [min] | Area [mAU] | Height [%] | Area % |
|----------|---------------|------|-------------|------------|------------|--------|
| 1        | 37.551        | BB   | 0.9139      | 2.67       |            |        |
| 2        | 46.177        | BB   | 1.1755      | 1006       |            |        |
| Totals : |               |      |             | 2.77       |            |        |

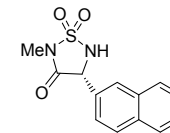

(+)-2k

=====  
 \*\*\*

Data File C:\CHEM32\1\DATA\ZHOU-16\YZN002636.D  
 Sample Name: ZZ-1-74(+)

```

=====
Acq. Operator   : 0
Acq. Instrument : Instrument 1          Location : Vial 1
Injection Date  : 10/20/2016 9:02:27 PM
Acq. Method     : C:\CHEM32\1\METHODS\DEF.LC.M
Last changed    : 10/20/2016 8:51:51 PM by 0
                  (modified after loading)
Analysis Method : C:\CHEM32\1\METHODS\DEF.LC.M
Last changed    : 10/23/2016 9:01:32 PM by 0
                  (modified after loading)
Sample Info     : AS-H, Hexane/i-PrOH = 70/30, 0.7 mL/min, 30oC, 220 nm
  
```

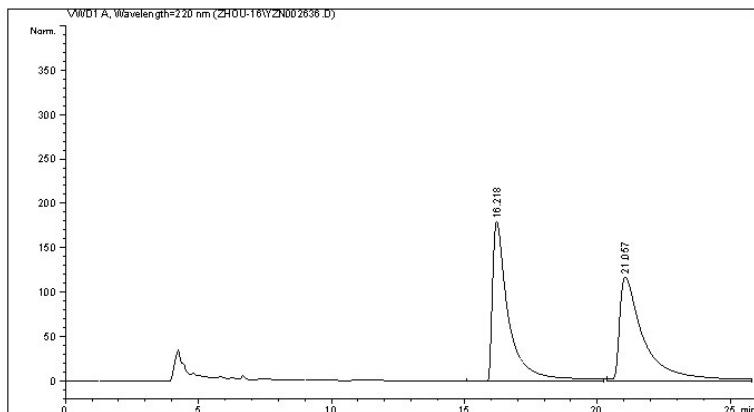

Area Percent Report

```

=====
Sorted By      : Signal
Multiplier:    : 1.0000
Dilution:      : 1.0000
Use Multiplier & Dilution Factor with ISTDs
  
```

Signal 1: VWD1 A, Wavelength=220 nm

| Peak #   | RetTime [min] | Type | Width [min] | Area [mAU*s] | Height [mAU] | Area %  |
|----------|---------------|------|-------------|--------------|--------------|---------|
| 1        | 16.218        | BB   | 0.6108      | 7678.07275   | 180.14059    | 50.3050 |
| 2        | 21.057        | BBA  | 0.9095      | 7584.95752   | 117.62991    | 49.6950 |
| Totals : |               |      |             | 1.52630e4    | 297.77051    |         |

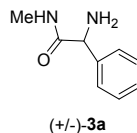

\*\*\* End of Report \*\*\*

Data File C:\CHEM32\1\DATA\ZHOU-16\YZN002636.D  
 Sample Name: ZZ-1-75

```

=====
Acq. Operator   : 0
Acq. Instrument : Instrument 1          Location : Vial 1
Injection Date  : 10/23/2016 9:03:32 PM
Acq. Method     : C:\CHEM32\1\METHODS\DEF.LC.M
Last changed    : 10/23/2016 9:03:32 PM by 0
                  (modified after loading)
Analysis Method : C:\CHEM32\1\METHODS\DEF.LC.M
Last changed    : 10/23/2016 9:03:32 PM by 0
                  (modified after loading)
Sample Info     : AS, Hexane/i-PrOH = 70/30, 0.7 mL/min, 30oC, 220 nm
  
```

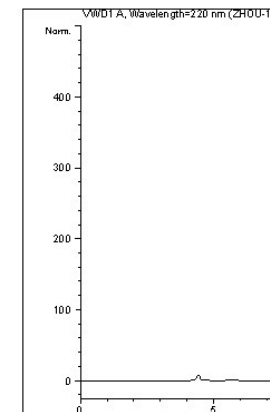

Area Percent Report

```

=====
Sorted By      : Signal
Multiplier:    : 1.0000
Dilution:      : 1.0000
Use Multiplier & Dilution Factor with ISTDs
  
```

Signal 1: VWD1 A, Wavelength=220 nm

| Peak #   | RetTime [min] | Type | Width [min] | Area [mAU*s] | Height [mAU] | Area % |
|----------|---------------|------|-------------|--------------|--------------|--------|
| 1        | 16.321        | BV   | 0.6321      | 1.622        | 1.622        | 1.622  |
| 2        | 23.266        | VB   | 1.4371      | 450.1        | 450.1        | 450.1  |
| Totals : |               |      |             | 1.667        |              |        |

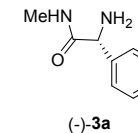

\*\*\* End of Report \*\*\*
